# Supplementary material for: Effects of high-intensity training on the quality of life of cancer patients and survivors: a systematic review with meta-analysis
Source: PubMed Central journal article supplement (PMC8302720; doi:10.1038/s41598-021-94476-y), 2021-07-23

# Effects of high-intensity training on the quality of life of cancer patients and survivors: a systematic review with meta-analysis

Lavín-Pérez, Ana Myriam; Collado-Mateo, Daniel; Mayo, Xian; Liguori, Gary; Humphreys, Liam; Copeland, Robert James; Jiménez, Alfonso

SUPPLEMENTARY TABLE S1. Additional characteristics from the meta-analysis participants.

| Study                   | Group  | Stage (%)                            | Physical activity level                                        | Study                   | Group                     | Stage (%)                           | Physical activity level                                                                                    |    |
|-------------------------|--------|--------------------------------------|----------------------------------------------------------------|-------------------------|---------------------------|-------------------------------------|------------------------------------------------------------------------------------------------------------|----|
| Egegaard et al. (2019)  | CG     | IIIa (28.6%) IIIb (57.1%) IV (14.3%) | NR                                                             | Martin et al. (2015) c) | CG                        | I (3.5%) II (54.28%) III (34.28%)   | Total Activity 51.1% Moderate 4.7% Vigorous 2.6%                                                           |    |
|                         | HIEG   | IIIa (37.5%) IIIb (50.0%) IV (12.5%) | NR                                                             |                         | HIEG                      | I (11.1%) II (62.96%) III (25.92%)  | Total Activity 32.5.8% Moderate 1.9% Vigorous 0.8%                                                         |    |
| Mijwel et al. (2018)    | CG     | I-IIa                                | MVPA: 8.5 % of wear time SED: 66.6 % of wear time              | Martin et al. (2015) a) | LIEG                      | I (20%) II (68%) III (12%)          | Total Activity 30% Moderate 2.7% Vigorous 1.4%                                                             |    |
|                         | HIEG-R |                                      | MVPA: 9.6 % of wear time SED: 63.7 % of wear time              |                         | CG                        | I (42%) II (50%) III (8%)           | Total Activity 35.3% Moderate 3.1% Vigorous 1.6%                                                           |    |
|                         | HIEG-A |                                      | MVPA: 8.3 ± 2.8 % of wear time SED: 65.6 ± 6.2 % of wear time  |                         | HIEG                      | I (46%) II (54%)                    | Total Activity 20% Moderate 1.5% Vigorous 0.8 %                                                            |    |
| Adams et al. (2018)     | CG     | NR                                   | Aerobic 25% Resistance 35.7%                                   | Van Waart et al. (2015) | LIEG                      | I (42%) II (50%) III (8%)           | Total Activity 32.2% Moderate 3.4% Vigorous 0.8%                                                           |    |
|                         | HIEG   | NR                                   | Aerobic 45.7% Resistance 20%                                   |                         | CG                        | I (6%) II (48%) III (46%)           | Not following a formal exercise program (sedentary and active)                                             |    |
| Van Waart et al. (2017) | CG     | II (13%) III (75%) IV (13%)          | Not following a formal exercise program (sedentary and active) | HIEG                    | I (7%) II (42%) III (51%) | CG                                  |                                                                                                            | NR |
|                         | HIEG   | II (14%) III (86%) IV (0%)           |                                                                | LIEG-H                  | I (3%) II (52%) III (45%) |                                     |                                                                                                            |    |
|                         | LIEG-H | II (13%) III (75%) IV (13%)          |                                                                |                         |                           |                                     |                                                                                                            |    |
| Persoon et al. (2017)   | CG     | NR                                   | Sports history (66%)                                           | Møller et al. (2015)    | HIEG                      | NR                                  | <150 min moderate activity/week (42.85%) >150 min/week (57.14%) <2×20 min strenuous activity / week (100%) |    |
|                         | HIEG   | NR                                   | Sports history (61%)                                           |                         | LIEG                      | NR                                  | <150 min moderate activity/week (26.66%) >150 min/week (78.57%) <2×20 min strenuous activity / week (100%) |    |
| Mijwel et al. (2017)    | CG     | I-IIa                                | MVPA: 68 min/day SED: 548 min/day                              | Edvardsen et al. (2015) | CG                        | I (48%) II (39%) III (7%) V (3%)    | NR                                                                                                         |    |
|                         | HIEG-R |                                      | MVPA: 79. min/day SED:530min/day                               |                         | HIEG                      | I (60%) II (23%) III (17%)          | NR                                                                                                         |    |
|                         | HIEG-A |                                      | MVPA: 71 min/day SED: 544. min/day                             |                         | CG                        | I (31.6) II (47.3%) III (21.1%)     | NR                                                                                                         |    |
| Toohey et al. (2016)    | HIEG   | NR                                   | NR                                                             | Cornie et al. (2013)    | HIEG                      | I (9.1%) II (81.8%) III (9.1%)      | NR                                                                                                         |    |
|                         | MIEG   | NR                                   | NR                                                             |                         | LIEG                      | I (23.8%) II (47.6%) III (28.6%)    | NR                                                                                                         |    |
| Schmitt et al. (2016)   | HIEG   | NR                                   | NR                                                             | Andersen et al. (2013)  | CG                        | NR                                  | Sedentary (16.3%) For pleasure (25%) Regular exercise (61.5%) Intense exercise (5.8%)                      |    |
|                         | LIEG   | NR                                   | NR                                                             |                         | HIEG                      | NR                                  | Sedentary (17.3%) For pleasure (56.7%) Regular exercise (23.1%) Intense exercise (2.9%)                    |    |
| Dunne et al. (2016)     | CG     | NR                                   | NR                                                             | Hwang et al. (2012)     | CG                        | II A (9.1%) IV (90.9%)              | NR                                                                                                         |    |
|                         | HIEG   | NR                                   | NR                                                             |                         | HIEG                      | II A (7.7%) II B (15.4%) IV (76.9%) | NR                                                                                                         |    |
| Kampshoff et al. (2015) | CG     | I-II (68%) II-IV (32%)               | Sport history (54%) Exercise during chemotherapy (11%)         | Adamsen et al. (2009)   | CG                        | NR                                  | Sedentary (19.8%) For pleasure (38.1%) Regular exercise (37.3%) Intense activity (4.8%)                    |    |
|                         | HIEG   | I-II (75%) II-IV (25%)               | Sport history (50%) Exercise during chemotherapy (23%)         |                         | HIEG                      | NR                                  | Sedentary (17.4%) For pleasure (56.8%) Regular (22.7%) Intense physical activity (3.0%)                    |    |
|                         | LMIEG  | I-II (60%) II-IV (40%)               | Sport history (65%) Exercise during chemotherapy (22%)         |                         |                           |                                     |                                                                                                            |    |

CG: (inactive) control group; HIEG: high-intensity exercise group; HIEG-R: high-intensity exercise group with resistance component; HIEG-A: high-intensity exercise group with aerobic component; MIEG: moderate intensity exercise group; LIEG: low intensity exercise group; LMIEG: low to intensity exercise group; MVPA: moderate to vigorous physical activity; NR: not reported

SUPPLEMENTARY TABLE S2. Characteristics of the participants included only in the systematic-review.

| Study                     | Design                                | Group | Sample size (% of females) | Age (SD)    | Cancer type (%)                                                                                   | Stage (%)                                                 | Treatment                                                                           | Timing         | BMI        | Physical activity level                                                                                             |
|---------------------------|---------------------------------------|-------|----------------------------|-------------|---------------------------------------------------------------------------------------------------|-----------------------------------------------------------|-------------------------------------------------------------------------------------|----------------|------------|---------------------------------------------------------------------------------------------------------------------|
| Pereira et al. (2020)     | Randomized Control Trial              | CG    | n=66 (100%)                | 53 (7)      | Breast cancer                                                                                     | II                                                        | Surgery (14%) Chemotherapy (60%)<br>Radiation therapy (70%) Hormone therapy (43%)   | After          | 30 (4.2)   | Sedentary                                                                                                           |
|                           |                                       | HIEG  | n=70 (100%)                | 55 (5)      |                                                                                                   |                                                           |                                                                                     |                | 31 (3.9)   |                                                                                                                     |
|                           |                                       | MIEG  | n=80 (100%)                | 51 (4)      |                                                                                                   |                                                           |                                                                                     |                | 29 (5.4)   |                                                                                                                     |
| Christensen et al. (2018) | Safety and feasibility study          | CG    | n= 29 (6.89%)              | 27.8 (5.5)  | Adenocarcinoma                                                                                    | 0 (3%) I (17%) II (62%) III (17%)                         | Surgery (79.31%) Chemotherapy (89.65%)                                              | During         | 27.8 (5.5) | NR                                                                                                                  |
|                           |                                       | HIEG  | n= 21 (14.28%)             | 28.4 (5.6)  |                                                                                                   | 0 (14%) I (33%) II (38%) III (14%)                        | Surgery (90.47%) Chemotherapy (95.24%)                                              | During         | 28.4 (5.6) | NR                                                                                                                  |
| Toohey et al. (2018)      | Randomized Clinical Trial             | CG    | n=25(100%)                 | 57(11.5)    | Breast (83%), Ovarian (8.5%), Appedix, Cervical (8.5%)                                            | I-II (83%) II-IV (17%)                                    | Surgery (100%) Radiation therapy (83%)<br>Hormone therapy (75%) Chemotherapy, (66%) | After          | NR         | Sedentary                                                                                                           |
|                           |                                       | HIEG  | n= 25(100%)                | 48 (11.9)   | Breast (88%), Cervical (4%), Liver (4%), Esophageal (4%)                                          | I-II (19%) II-IV (21%)                                    | Surgery (88%) Radiation therapy (75%)<br>Hormone therapy (79%) Chemotherapy (82%)   | After          | NR         | Sedentary                                                                                                           |
|                           |                                       | LIEG  | n= 25 (100%)               | 52 (12.4)   | Breast (75%), Ovarian (5%), Appedix (5%), Malenoma (5%), Leiomyosarcoma (5%), Unknow primary (5%) | I-II (76%) II-IV (24%)                                    | Surgery (95%) Radiation therapy (62%)<br>Hormone therapy (71%) Chemotherapy (71%)   | After          | NR         | Sedentary                                                                                                           |
| Brunet at al. (2017)      | Non-randomized controlled pilot trial | CG    | n= 13 (31%)                | 72          | Rectal cancer                                                                                     | ≥T2/N+                                                    | Chemoradiation (100%)                                                               | Before surgery | 24.9 (3.9) | NR                                                                                                                  |
|                           |                                       | HIEG  | n= 22 (36%)                | 64          | Rectal cancer                                                                                     | ≥T2/N+                                                    | Chemoradiation (100%)                                                               | Before surgery | 27.4 (5.1) | NR                                                                                                                  |
| Waked et al. (2016)       | Randomized control trial              | CG    | n=23 (100%)                | 48.3(8.9)   | Breast cancer                                                                                     | Local (30.4%)<br>Loco-regional (30.4%) Metastasis (39.1%) | Surgery (56.5%) Chemotherapy (34.8%)<br>Radiation (8.7%)                            | After          | NR         | NR                                                                                                                  |
|                           |                                       | HIEG  | n=23 (100%)                | 49.82 (9.9) |                                                                                                   | Local (21.7%)<br>Loco-regional (39.1%) Metastasis (39.1%) | Surgery (47.8%) Chemotherapy (39.1%)<br>Radiation (13.0%)                           | After          | NR         | NR                                                                                                                  |
| Midtgaard et al. (2013)   | Randomised controlled trial           | CG    | n =106 (83%)               | 46.2 (11.6) | Breast (60.2%) Bowel (5%) Ovaries (2%)<br>Uterus (2%) Testicles (8%)                              | NR                                                        | Surgery (82.07%) Chemotherapy (100%)<br>Radiation (68.86%) Homonotherapy (47.17%)   | After          | 25.1 (3.8) | Sedentary (13%)<br>Walking or cycling for pleasure (60.2%)<br>Regular physical exercise at least 3 h/week (25%)     |
|                           |                                       | HIEG  | n= 108 (83.3%)             | 48.2 (10.1) | Breast (61.1%) Bowel (6%) Ovaries (6%)<br>Uterus (5%) Testicles (3%)                              | NR                                                        | Surgery (77.77%) Chemotherapy (100%)<br>Radiation (60.18%) Homonotherapy (45.37%)   | After          | 24.6 (3.8) | Sedentary (10.2%)<br>Walking or cycling for pleasure (63.9%)<br>Regular physical exercise at least 3 h/week (25.9%) |

CG: (inactive) control group; HIEG: high-intensity exercise group; HIEG-R: high-intensity exercise group with resistance training; HIEG-A: high-intensity exercise group with aerobic training; MIEG: moderate intensity exercise group; LIEG: low intensity exercise group; LIEG-H: low intensity exercise group at home; NR: not reported; BMI: Body Mass Index.

SUPPLEMENTARY TABLE S3. Characteristics of the exercise interventions included only in the systematic-review.

| Study                     | Group | Duration   | Sessions duration                   | Weekly frequency       | Setting                                | Exercise description                                                                                                                                               | Intensity progression and control                                                                                                                                                                                              | Attendance      |
|---------------------------|-------|------------|-------------------------------------|------------------------|----------------------------------------|--------------------------------------------------------------------------------------------------------------------------------------------------------------------|--------------------------------------------------------------------------------------------------------------------------------------------------------------------------------------------------------------------------------|-----------------|
| Pereira et al. (2020)     | CG    |            |                                     |                        |                                        |                                                                                                                                                                    |                                                                                                                                                                                                                                |                 |
|                           | HIEG  | 36 weeks   | 70 min                              | 3 times/week           | NR                                     | 10 min warm-up<br>30 min aerobic: 30 s intervals<br>20 min resistance<br>10 min cool-down                                                                          | Aerobic: intercalated intervals of 60-80 % (HRmax) and 80-90% (hrmax)<br>Resistance: 60% RM<br>Additional control: RPE                                                                                                         |                 |
|                           | MIEG  | 36 weeks   | 70 min                              | 3 times/week           | NR                                     | 10 min warm-up<br>30 min aerobic<br>20 min resistance<br>10 min cool-down                                                                                          | Aerobic: 60-80 % (HRmax)<br>Resistance: 60% RM<br><br>Additional control: RPE                                                                                                                                                  |                 |
| Christensen et al. (2018) | CG    | 3-20 weeks |                                     |                        |                                        |                                                                                                                                                                    |                                                                                                                                                                                                                                |                 |
|                           | HIEG  | 3-20 weeks | 75 min                              | 2 times/week           | Centre for Physical Activity Research, | 10 min cycle warm-up<br>Aerobic:4x4 min intervals with 3 min active recovery between/ Resistance: four exercises major muscle groups: 3 series of 8-12 repetitions | Intervals: high intensity<br>Recovery: low intensity                                                                                                                                                                           | 68.7%           |
| Toohey et al. (2018)      | CG    | 12 weeks   |                                     |                        |                                        |                                                                                                                                                                    |                                                                                                                                                                                                                                | Compliance: 92% |
|                           | HIEG  | 12 weeks   | 20-30 min                           | 3 times/week           | Supervised                             | 5 min warm-up<br>7x30s intervals with 1min rest<br>5 min cool-down                                                                                                 | Intervals ≥85% (HRmax)<br>From 3 intervals in the first session to 7 intervals in week 5<br>Additional control: Blood pressure                                                                                                 |                 |
|                           | MIEG  | 12 weeks   | 30 min                              | 3 times/week           | Supervised                             | 5 min warm-up<br>20 min cycle continuous Aerobic<br>5 min cool-down                                                                                                | ≤ 55% predicted maximal heart rate                                                                                                                                                                                             |                 |
| Brunet et al. (2017)      | HIEG  | 6 weeks    | 30 min (first 3 sessions)<br>40 min | 3 times/week           | Hospital                               | 5 min warm-up<br>3 min braked cycle ergometer intervals with 2 min intervals<br>5 min cool-down                                                                    | 3 min Intervals: moderate intensity (80% of oxygen uptake at lactate threshold)<br>2 min intervals: vigorous intensity (50% of the difference in work rates between peak oxygen uptake and oxygen uptake at lactate threshold) | 96% (5.0)       |
| Waked et al. (2016)       | CG    | 8 weeks    |                                     |                        |                                        |                                                                                                                                                                    |                                                                                                                                                                                                                                |                 |
|                           | HIEG  | 8 weeks    | 90 min                              | 3 times/week           | National Cancer Institute              | 30 min warm-up: dynamic exercises<br>45 min resistance: 6 exercise 3 series 5-8 rep<br>15 min aerobic cycling                                                      | Resistance: 70-100% RM (5.5 METs)<br>Aerobic: 70-250 W 85-95% (HRmax) (15 METs)                                                                                                                                                |                 |
| Midtgaard et al. (2013)   | CG    | 12 months  |                                     |                        |                                        |                                                                                                                                                                    |                                                                                                                                                                                                                                |                 |
|                           | HIEG  | 12 months  | 90 min                              | 3h/week<br>1 time/week | Supervised                             | Aerobic:<br>30s-6 min cycle ergometers intervals with a recovery ratio of 1:2 3:1<br>Resistance: 3 series of 8-10 repetitions                                      | Intervals: 30 s (maximum intensity) 6 min 90-95% (HRmáx)<br>Resistance: 70%- 90% (RM)<br>Resistance increased when 12 repetitions could be done                                                                                | 66.6%           |

CG: (inactive) control group; HIEG: high-intensity exercise group; HIEG-R: high-intensity exercise group with resistance component; HIEG-A: high-intensity exercise group with aerobic component; MIEG: moderate intensity exercise group; W: watiots; PP: power peak; RM: repetition maximum; METs: Metabolic equivalent; RPE: rate of perceived exertion; HR: heart rate; CPET: Cardiopulmonary exercise test; NR. Not reported.

SUPPLEMENTARY TABLE S4. HRQoL outcomes not included in the meta-analysis because not having enough data to compare.

|                | Study                         | Group | Variable                | Mean pre           | SD pre | Mean post   | SD post | p value                      |              |
|----------------|-------------------------------|-------|-------------------------|--------------------|--------|-------------|---------|------------------------------|--------------|
| EORTC QLQ- C30 | Pereira et al. (2020)         | CG    | Global QoL              | 64.5               | 12.9   | 63.3        | 13.4    | SDBG p=0.002                 |              |
|                |                               | HIEG  |                         | 58.6               | 17     | 125         | 11.8    |                              |              |
|                |                               | MIEG  |                         | 60.7               | 16.7   | 68.7        | 13.6    |                              | SDBG p<0.001 |
|                | Mijwel et al (2017)           | HIAG  | Insomnia                | 31.85              | 25.58  | 27.51       | 28.92   | NSDIG                        |              |
|                |                               | HIAG  | Appetite loss           | 24.5               | 26.7   | 19.53       | 24.97   | NSDIG                        |              |
|                |                               | HIAG  | Diarrhoea               | 13.15              | 22.87  | 17.74       | 26.42   | NSDIG                        |              |
|                |                               | CG    | Financial difficulties, | 20.11              | 31.95  | 18.67       | 32.53   | NSDIG                        |              |
|                |                               | HIRG  |                         | 21.73              | 31.75  | 25.45       | 34.71   | SDIG p<0.05                  |              |
|                |                               | HIAG  |                         | 16.54              | 26.85  | 23.19       | 33.54   |                              |              |
|                | Persoon et al (2017)          | CG    | Disease symptomsd       | 19.8               | 14.6   | 18.8        | 17.1    | NSDIG ;NSDBG                 |              |
|                |                               | EG    |                         | 16.6               | 13.1   | 18.7        | 12.8    | NSDIG;NSDBG                  |              |
|                |                               | CG    | Side effects            | 21.9               | 11.8   | 12.1        | 8.9     | NSDIG;NSDBG                  |              |
|                |                               | EG    |                         | 21.5               | 9.7    | 10.6        | 8.1     | NSDIG;NSDBG                  |              |
|                | Schmitt et al. (2016)         | HIEG  | Insomnia                | 48.8               | 29.4   | 38.5        | 26.9    | SDIG p=0.02<br>NSDBG         |              |
|                |                               | MIEG  |                         | 61.5               | 26.9   | 43.5        | 25.2    | SDIG p=0.01<br>NSDBG         |              |
|                |                               | HIEG  | Appetite loss           | 7.7                | 20     | 2.5         | 9.2     | NSDIG ; NSDBG                |              |
|                |                               | MIEG  |                         | 20.5               | 25.6   | 7.6         | 14.5    | SDIG p=0.04<br>NSDBG         |              |
|                |                               | HIEG  | Diarrhoea               | 5.1                | 12.4   | 5.1         | 12.4    | NSDIG                        |              |
|                |                               | MIEG  |                         | 33.3               | 33.4   | 15.3        | 29.2    | NSDBG                        |              |
|                |                               | HIEG  | Financial difficulties  | 28.2               | 42.7   | 25.6        | 33.8    | NSDIG<br>NSDBG               |              |
|                |                               | MIEG  |                         | 38.5               | 35.7   | 40.5        | 38.1    | NSDIG<br>NSDBG               |              |
|                | Moller et al (2015) (a)       | CG    | Financial difficulties  | 30.3               | 34.82  | 25.93       | 40.06   | NR                           |              |
|                |                               | HIEG  |                         | 15.15              | 22.92  | 14.81       | 29.4    | NR                           |              |
|                |                               | LIEG  |                         | 30.3               | 34.82  | 25.93       | 40.06   | NR                           |              |
|                | Moller et al (2015) (b)       | CG    | Financial difficulties  | 0                  | 0      | 0           | 0       | NR                           |              |
|                |                               | HIEG  |                         | 41.67              | 50     | 25          | 31.91   | NR                           |              |
|                |                               | LIEG  |                         | 0                  | 0      | 11.11       | 19.25   | NR                           |              |
|                | Adamsen (2009)                | CG    | Financial difficulties  | 14.3               | 27.7   | 13          | 25.9    | NSDBG                        |              |
| EG             |                               | 11.1  |                         | 21.5               | 10.8   | 19.3        | NSDBG   |                              |              |
| SF 36          | Dunne (2016)                  | CG    | Overall QoL             | 71                 | 200    | 71          | 220     | NSDIG                        |              |
|                |                               | EG    |                         | 65                 | 230    | 77          | 180     | SDIG p=0.002<br>SDBG p=0.028 |              |
|                | Adamsen (2009)                | CG    | Mental component        | 46.9               | 10.2   | 47.3        | 10      | SDBG p=0.004                 |              |
|                |                               | HIEG  |                         | 44.2               | 8.4    | 47.4        | 6.7     |                              |              |
|                | Adamsen (2009)                | CG    | Physical component      | 44.3               | 8.3    | 45.1        | 8.5     | SDBG p=0.02                  |              |
|                |                               | HIEG  |                         | 46.5               | 9.7    | 50.5        | 9.4     |                              |              |
|                | Moller (2015) (a)             | CG    | Role emotional          | 70.5               | 19.3   | 66.2        | 20.6    | NR                           |              |
|                |                               | HIEG  |                         | 76                 | 21.6   | 75.1        | 20.4    | NR                           |              |
|                |                               | LMIEG |                         | 69.7               | 43.35  | 70.37       | 42.31   | NR                           |              |
|                | Moller (2015) Prostate cancer | CG    | Role emotional          | 66.67              | 33.33  | 16.67       | 23.57   | NR                           |              |
|                |                               | HIEG  |                         | 11.11              | 19.25  | 33.33       | 47.14   | NR                           |              |
|                |                               | LMIEG |                         | 0                  | 0      | 22.22       | 19.25   | NR                           |              |
| FACT G         | Andersen (2013)               | CG    | General score           | 78.84              | 13.97  | 81.45       | 13.33   | NSDBG p=0.21                 |              |
|                |                               | HIEG  |                         | 81.14              | 14.51  | 84.41       | 12.88   |                              |              |
|                |                               | CG    | Physical wellbeing      | 19.77              | 5.44   | 20.59       | 5.19    |                              |              |
|                |                               | HIEG  |                         | 20.64              | 5.41   | 21.92       | 4.59    |                              | NSDBG p=0.13 |
|                | Toohey et al. (2016)          | CG    | Functional wellbeing    | 17.85              | 5.81   | 18.67       | 5.1     | NSDBG p=0.26                 |              |
|                |                               | HIEG  |                         | 18.93              | 4.97   | 19.92       | 4.88    |                              |              |
|                |                               | HIEG  | General score           | 77.63              | 13.59  | 89.50       | 6.82    |                              | SDBG p<0.05  |
|                |                               | MIEG  |                         | 81.25              | 9.45   | 85.88       | 7.38    |                              |              |
|                |                               | HIEG  |                         | Physical wellbeing | 22.63  | 5.93        | 24.75   |                              | 1.39         |
| MIEG           |                               | 21.63 | 3.16                    | 23.75              | 2.25   | NSDIG       |         |                              |              |
| HIEG           |                               | 18.13 | 5.94                    | 22.63              | 3.34   | SDIG p<0.05 |         |                              |              |



|              |                                        |              |                       |       |       |       |                              |                      |
|--------------|----------------------------------------|--------------|-----------------------|-------|-------|-------|------------------------------|----------------------|
| FACT -B      | Martin et al (2015)<br>Breast cancer   | MIEG         | Functional wellbeing  | 20.88 | 3.94  | 23.13 | 3.04                         | NSDIG                |
|              |                                        | CG           | General score         | 83.8  | 13.5  | 91.1  | 11.6                         | SDIG p=0.044         |
|              |                                        | HIEG         |                       | 83.8  | 13.2  | 90.9  | 9.3                          |                      |
|              |                                        | LIEG         |                       | 81.8  | 15.5  | 84    | 16.8                         |                      |
|              |                                        | CG           | Physical wellbeing    | 22.5  | 4.2   | 24.7  | 2.8                          | SDIG p=0.019         |
|              |                                        | HIEG         |                       | 21.7  | 5.6   | 24.3  | 3                            |                      |
|              |                                        | LIEG         |                       | 21.1  | 4.4   | 22.3  | 4.5                          |                      |
|              |                                        | CG           | Functional wellbeing  | 20.9  | 4.4   | 23.8  | 3.7                          | NR                   |
|              |                                        | HIEG         |                       | 20.7  | 4.4   | 23    | 3.2                          | NR                   |
|              |                                        | LIEG         |                       | 20.8  | 5     | 21.4  | 4.8                          | NR                   |
|              |                                        | CG           | FACT-B                | 107.6 | 18.5  | 116.2 | 16.9                         | NR                   |
|              |                                        | HIEG         |                       | 106.8 | 17.2  | 107.6 | 18.5                         | SDIG (CG)<br>p=0.014 |
|              | LIEG                                   | 104.1        |                       | 19.2  | 116.9 | 12.8  |                              |                      |
|              | Martin et al (2015)<br>Prostate cancer | CG           | General score         | 87.3  | 12.7  | 90.1  | 9.6                          | SDIG p=0.044         |
|              |                                        | HIEG         |                       | 84.2  | 11.8  | 86    | 12                           |                      |
|              |                                        | LIEG         |                       | 82.5  | 16.4  | 85.7  | 14.5                         |                      |
|              |                                        | CG           | Physical wellbeing    | 23.7  | 4.2   | 24    | 3.3                          | SDIG p=0.019         |
|              |                                        | HIEG         |                       | 22.9  | 3.6   | 23.9  | 3.9                          | NR                   |
|              |                                        | LIEG         |                       | 22.6  | 4.1   | 24.1  | 3.6                          | NR                   |
|              |                                        | CG           | Functional wellbeing  | 22.7  | 5.4   | 24.2  | 3.1                          | NR                   |
|              |                                        | HIEG         |                       | 21.3  | 4.2   | 21.9  | 4.3                          | NR                   |
|              |                                        | LIEG         |                       | 19.4  | 6.5   | 21    | 5.2                          | NR                   |
|              |                                        | CG           | FACT-P                | 122.2 | 17.4  | 126.0 | 14.9                         | NR                   |
|              |                                        | HIEG         |                       | 117.2 | 15.4  | 120.5 | 17.1                         | NSDIG                |
|              |                                        | LIEG         |                       | 113.9 | 22.4  | 121.5 | 18.8                         |                      |
|              | Egegaard (2019)                        | CG           | Physical well-being   | 19.2  | 8.3   | 22.0  | 4.3                          | NSDBG                |
|              |                                        | HIEG         |                       | 21.4  | 6.4   | 20.9  | 5.6                          |                      |
|              |                                        | CG           | Functional well-being | 17.4  | 7.1   | 17.4  | 4.7                          | NSDBG                |
|              |                                        | HIEG         |                       | 17.6  | 5.4   | 18.0  | 5.5                          |                      |
|              |                                        | CG           | Global score          | 80.2  | 16.4  | 83.8  | 12.9                         | NSDBG                |
|              |                                        | HIEG         |                       | 79.1  | 12.7  | 81.0  | 12.5                         |                      |
|              |                                        | CG           | FACT- L               | 99.6  | 19.0  | 106.6 | 14.3                         | NSDBG                |
|              |                                        | HIEG         |                       | 96.6  | 14.8  | 99.0  | 16.2                         |                      |
| Waked (2016) | CG                                     | Global score | 80.43                 | 10.90 | 82.86 | 12.34 | NSDIG                        |                      |
|              | HIEG                                   |              | 78.13                 | 12.14 | 112.1 | 11.08 | SDIG p<0.001<br>SDBG p<0.001 |                      |

CG: (Inactive) control group; HIEG: High-intensity exercise group; HIEG-A: High-intensity exercise group with aerobic component; MIEG: moderate intensity exercise group; SDIG: Significant difference inside group; SDBG: Significant difference between groups; NSDIG: Not significant difference inside group; NSDBG: Not significant difference between groups, NR. Not reported.

SUPPLEMENTARY TABLE S5. HRQoL outcomes not included in the meta-analysis because not reporting the necessary statistic data.

| EORTC-QLQ-C30 | Study            | Group                               | Outcome measure        | Statistic results                                                          | p value            |
|---------------|------------------|-------------------------------------|------------------------|----------------------------------------------------------------------------|--------------------|
|               | Midtgaard (2013) | CG                                  | Global quality of life | Mean before 67.16 CI: 62.65 - 71.52<br>Mean after: 77.44 CI: 72.74 - 81.82 | SDIG p<0.001       |
|               |                  | HIEG                                |                        | Mean before 67.21 CI: 62.70 - 71.56<br>Mean after: 81.71 CI: 77.16 - 85.85 | SDIG p<0.001 NSDBG |
|               |                  | CG                                  | Physical functioning   | Mean before 67.21 CI: 62.70 - 71.56<br>Mean after: 81.71 CI: 77.16 - 85.85 | SDIG p<0.001       |
|               |                  | HIEG                                |                        | Mean before 90.97 CI: 88.54 - 93.13<br>Mean after: 95.94 CI: 93.97-57      | SDIG p<0.001 NSDBG |
|               |                  | CG                                  | Role functioning       | Mean before 82.51 CI: 77.05 - 87.37<br>Mean after: 90.93 CI: 85.87 - 94.96 | SDIG p<0.001       |
|               |                  | HIEG                                |                        | Mean before 79.82 CI: 74.10 - 84.99<br>Mean after: 95.35 CI: 91.24 - 98.20 | SDIG p<0.01 NSDBG  |
|               |                  | CG                                  | Emotional functioning  | Mean before 84.13 CI: 76.96 - 85.17<br>Mean after: 88.59 CI: 84.47 - 92.15 | SDIG p<0.01        |
|               |                  | HIEG                                |                        | Mean before 81.24 CI: 80.09 - 87.79<br>Mean after: 77.44 CI: 86.55 - 93.91 | SDIG p<0.001 NSDBG |
|               |                  | CG                                  | Cognitive functioning  | Mean before 85.43 CI: 80.99 - 89.38<br>Mean after: 90.55 CI: 78.65 - 88.58 | NSDIG              |
| HIEG          |                  | Mean before 89.14 CI: 85.17 - 92.56 |                        | SDIG p<0.05 NSDBG                                                          |                    |

|       |                    |                                                                             |                                     |                                                                                     |                    |
|-------|--------------------|-----------------------------------------------------------------------------|-------------------------------------|-------------------------------------------------------------------------------------|--------------------|
| SF-36 | Midtgaard<br>2013  |                                                                             | Mean after: 93.29 CI: 80.99 - 89.38 |                                                                                     |                    |
|       |                    | CG                                                                          | Social functioning                  | Mean before 86.84 CI: 82.20 - 90.88<br>Mean after: 94.65 CI: 90.77 - 97.51          | SDIG p<0.001       |
|       |                    | HIEG                                                                        |                                     | Mean before 86.55 CI: 81.88 - 90.63<br>Mean after: 96.3 CI: 92.90 - 98.71           | SDIG p<0.01 NSDBG  |
|       |                    | CG                                                                          | Fatigue                             | Mean before: 34.56 CI: 29.46 - 39.85<br>Mean after: 22.68 CI: 17.62 - 28.18         | SDIG p<0.001       |
|       |                    | HIEG                                                                        |                                     | Mean before: 38.50 CI: 33.26 - 43.87<br>Mean after: 21.88 CI: 16.74 - 27.49         | SDIG p<0.01 NSDBG  |
|       |                    | CG                                                                          | Nausea and vomiting                 | Mean before 1.03 CI: 0.48 - 1.80<br>Mean after: 0.54 CI: 0.12 - 1.26                | NSDIG              |
|       |                    | HIEG                                                                        |                                     | Mean before 1.06 CI: 0.49 - 1.83<br>Mean after: 0.19 CI: 0.00 - 0.71                | SDIG p<0.05 NSDBG  |
|       |                    | CG                                                                          | Pain                                | Mean before 11.16 CI: 7.53 - 15.40<br>Mean after: 10.38 CI: 6.41 - 15.19            | NSDIG              |
|       |                    | HIEG                                                                        |                                     | Mean before: 10 CI: 6.58 - 14.05<br>Mean after: 6.4 CI: 3.24 - 10.54                | NSDIG; NSDBG       |
|       |                    | CG                                                                          | Dyspnoea                            | Mean before 8.51 CI: 5.61 - 11.93<br>Mean after: 2.01 CI: 0.57 - 4.30               | SDIG p<0.001 NSDBG |
|       |                    | HIEG                                                                        |                                     | Mean before 4.2 CI: 2.23 - 6.77<br>Mean after: 1.57 CI: 0.32 - 3.75                 | SDIG p<0.05        |
|       |                    | CG                                                                          | Diarrhoea                           | Mean before 4.83 CI: 2.45 - 7.97<br>Mean after: 2.06 CI: 0.45 - 4.81                | NSDIG              |
|       |                    | HIEG                                                                        |                                     | Mean before: 3.43 CI: 1.47 - 6.17<br>Mean after: 0.83 CI: 0.01 - 2.89               | SDIG p<0.05 NSDBG  |
|       |                    | CG                                                                          | Constipation                        | Mean before 2.22 CI: 0.91 - 4.09<br>Mean after: 0.92 CI: 0.11 - 2.51                | NSDIG              |
|       |                    | HIEG                                                                        |                                     | Mean before 2.98 CI: 1.42 - 5.09<br>Mean after: 0.45 CI: 0.00 - 1.73                | SDIG p<0.01 NSDBG  |
|       |                    | CG                                                                          | Appetite loss                       | Mean before: 0.93 CI: 0.29 - 1.94<br>Mean after: 0.80 CI: 0.15 - 1.97               | NSDIG              |
|       |                    | HIEG                                                                        |                                     | Mean before: 1.75 CI: 0.80 - 3.06<br>Mean after: 0.03 CI: 1.33 - 0.49               | SDIG p<0.001 NSDBG |
|       |                    | CG                                                                          | Insomnia                            | Mean before 23.82 CI: 16.72 - 32.54<br>Mean after: 18.02 CI: 11.10 - 26.20          | SDIG p<0.001 NSDBG |
|       |                    | HIEG                                                                        |                                     | Mean before 22.07 CI: 15.36 - 29.62<br>Mean after: 18.65 CI: 11.39 - 27.21          | NSDIG              |
|       |                    | CG                                                                          | Financial difficulties              | Mean before 9.84 CI: 5.35 - 15.49<br>Mean after: 8.79 CI: 4.17 - 14.90              | NSDIG              |
|       |                    | HIEG                                                                        |                                     | Mean before 4.55 CI: 1.67 - 8.75<br>Mean after: 0.98 CI: 0.00 - 3.85                | SDIG p<0.05 NSDBG  |
|       |                    | CG                                                                          | Psysical functioning                | Mean before: 87.86 CI: 85.10 - 90.38<br>Mean after: 93.71 CI: 91.37 - 95.70         | SDIG p<0.01        |
|       |                    | HIEG                                                                        |                                     | Mean before 4.55 CI: 1.67 - 8.75<br>Mean after: 95.44 CI: 93.29 - 97.20             | SDIG p<0.001 NSDBG |
|       |                    | CG                                                                          | Role Physical                       | Mean before 35.16 CI: 24.87 - 46.21<br>Mean after: 73.80 CI: 61.72 - 84.28          | SDIG p<0.01        |
|       |                    | HIEG                                                                        |                                     | Mean before 31.71 CI: 21.74 - 42.61<br>Mean after: 80.03 CI: 68.10 - 89.73          | SDIG p<0.001 NSDBG |
|       |                    | CG                                                                          | Bodily pain                         | Mean before: 80.43 CI: 75.05 - 85.29<br>Mean after: 84.35 CI: 78.67 - 89.30         | NSDIG              |
|       |                    | HIEG                                                                        |                                     | Mean before: 83.89 CI: 78.89 - 88.34<br>Mean after: 89.81 CI: 84.85 - 94.01         | SDIG p<0.05 NSDBG  |
|       |                    | CG                                                                          | General health perceptions          | Mean before: 68.51 - 77.86 CI: 61.08 - 69.61<br>Mean after: 71.01 CI: 66.40 - 75.41 | SDIG p<0.001       |
| HIEG  |                    | Mean before: 69.02 CI: 64.77 - 73.11<br>Mean after: 73.32 CI: 68.51 - 77.86 | SDIG p<0.001 NSDBG                  |                                                                                     |                    |
| CG    | Vitality           | Mean before: 54.76 CI: 50.39 - 59.10<br>Mean after: 66.54 CI: 61.80 - 71.11 | SDIG p<0.001                        |                                                                                     |                    |
| HIEG  |                    | Mean before: 54.23 CI: 49.83 - 58.59<br>Mean after: 71.81 CI: 67.00 - 76.38 | SDIG p<0.001 NSDBG                  |                                                                                     |                    |
| CG    | Social functioning | Mean before: 61.42 CI: 58.31 - 64.50<br>Mean after: 69.20 CI: 65.80 - 72.49 | SDIG p<0.001                        |                                                                                     |                    |
| HIEG  |                    | Mean before: 64.97 CI: 61.89 - 67.98<br>Mean after: 73.4 CI: 69.98 - 76.81  | SDIG p<0.001 NSDBG                  |                                                                                     |                    |
| CG    | Role emotional     | Mean before: 64.49 CI: 53.80 - 74.49<br>Mean after: 69.20 CI: 65.80 - 72.49 | SDIG p<0.001                        |                                                                                     |                    |
| HIEG  |                    | Mean before: 71.46 CI: 61.16 - 80.75<br>Mean after: 93.1 CI: 84.98 - 98.32  | SDIG p<0.001 NSDBG                  |                                                                                     |                    |
| CG    | Mental health      | Mean before: 75.26 CI: 72.06 - 78.33                                        | SDIG p<0.05                         |                                                                                     |                    |

|                                                                                                                                                                                                                                                                                                                                                                                                               |                         |                                                            |                                                            |                                                                                                                   |                    |
|---------------------------------------------------------------------------------------------------------------------------------------------------------------------------------------------------------------------------------------------------------------------------------------------------------------------------------------------------------------------------------------------------------------|-------------------------|------------------------------------------------------------|------------------------------------------------------------|-------------------------------------------------------------------------------------------------------------------|--------------------|
| FACT-G                                                                                                                                                                                                                                                                                                                                                                                                        | Toohey et al. (2018)    | HIEG                                                       |                                                            | Mean after: 80.29 CI: 76.94 - 83.45<br>Mean before 74.73 CI: 71.49 - 77.84<br>Mean after: 82.48 CI: 79.07 - 85.65 | SDIG p<0.001 NSDBG |
|                                                                                                                                                                                                                                                                                                                                                                                                               |                         | CG                                                         | Physical component scale                                   | Mean before: 45.81 CI: 44.33 - 47.29<br>Mean after: 49.38 CI: 47.73 - 51.02                                       | SDIG p<0.001       |
|                                                                                                                                                                                                                                                                                                                                                                                                               |                         | HIEG                                                       |                                                            | Mean before: 46.68 CI: 45.19 - 52.26<br>Mean after: 50.50 CI: 48.74 - 52.26                                       | SDIG p<0.001 NSDBG |
|                                                                                                                                                                                                                                                                                                                                                                                                               |                         | CG                                                         | Mental component scale                                     | Mean before 44.9873 CI: 43.13 - 46.85<br>Mean after: 48.70 CI: 46.60 - 50.80                                      | SDIG p<0.01        |
|                                                                                                                                                                                                                                                                                                                                                                                                               |                         | HIEG                                                       |                                                            | Mean before: 45.3077 CI: 43.43 - 47.19<br>Mean after: 50.71 CI: 48.45 - 52.98                                     | SDIG p<0.001 NSDBG |
|                                                                                                                                                                                                                                                                                                                                                                                                               |                         | CG                                                         | Physical wellbeing                                         | Mean after: 21.5 Mean difference: -0.3<br>CI: -1.09-0.51                                                          |                    |
|                                                                                                                                                                                                                                                                                                                                                                                                               | HIEG                    | Mean after: 25 Mean difference: 0.89 CI:<br>0.30-1.48      |                                                            | SDBG (CG) p=0.02                                                                                                  |                    |
|                                                                                                                                                                                                                                                                                                                                                                                                               | MIEG                    | Mean after: 22.48 Mean difference: 0.61<br>CI: -0.001-1.23 |                                                            | SDBG (CG) p=0.02                                                                                                  |                    |
|                                                                                                                                                                                                                                                                                                                                                                                                               | CG                      | Social wellbeing                                           | Mean after: 22.33 Mean difference: 0.2<br>CI: -0.85-0.75   |                                                                                                                   |                    |
|                                                                                                                                                                                                                                                                                                                                                                                                               | HIEG                    |                                                            | Mean after: 22.04 Mean difference: 0.35<br>CI: -0.22-0.92  | NSDBG (CG) p=0.057<br>NSDBG (MIEG)<br>p=0.057                                                                     |                    |
|                                                                                                                                                                                                                                                                                                                                                                                                               | MIEG                    |                                                            | Mean after: 22.04 Mean difference: 0.2<br>CI: -0.40-0.80   |                                                                                                                   |                    |
|                                                                                                                                                                                                                                                                                                                                                                                                               | CG                      | Emotional wellbeing                                        | Mean after: 17.92 Mean difference: -0.11<br>CI: -0.92-0.69 |                                                                                                                   |                    |
|                                                                                                                                                                                                                                                                                                                                                                                                               | HIEG                    |                                                            | Mean after: 19.42 Mean difference: 1.04<br>CI: 0.43-1.64   | SDBG (CG) p<0.01<br>SDBG (MIEG) p<0.01                                                                            |                    |
|                                                                                                                                                                                                                                                                                                                                                                                                               | MIEG                    |                                                            | Mean after: 17.57 Mean difference: 0.15<br>CI: -0.45-0.76  |                                                                                                                   |                    |
| CG                                                                                                                                                                                                                                                                                                                                                                                                            | Functional wellbeing    | Mean after: 19.58 Mean difference: -0.02<br>CI: -0.82-0.78 |                                                            |                                                                                                                   |                    |
| HIEG                                                                                                                                                                                                                                                                                                                                                                                                          |                         | Mean after: 23.17 Mean difference: 0.96<br>CI: 0.37-1.56   | SDBG (CG) p=0.02<br>SDBG (MIEG) p=0.02                     |                                                                                                                   |                    |
| MIEG                                                                                                                                                                                                                                                                                                                                                                                                          |                         | Mean after: 21.29 Mean difference: 0.64<br>CI: 0.02-1.26   |                                                            |                                                                                                                   |                    |
| CG                                                                                                                                                                                                                                                                                                                                                                                                            | Overall quality of life | Mean difference: -0.15 CI: -0.95-0.65                      |                                                            |                                                                                                                   |                    |
| HIEG                                                                                                                                                                                                                                                                                                                                                                                                          |                         | Mean difference: 1.11 CI: 0.50- 1.72                       | SDBG (CG) p<0.01<br>SDBG (MIEG) p<0.01                     |                                                                                                                   |                    |
| MIEG                                                                                                                                                                                                                                                                                                                                                                                                          |                         | Mean difference: 0.57 CI: -0.00-1.20                       |                                                            |                                                                                                                   |                    |
| CG: (inactive) control group; HIEG: high-intensity exercise group; HIEG-A: high-intensity exercise group with aerobic component; MIEG: moderate intensity exercise group; SDIG: Significant difference inside group; SDBG: Significant difference between groups; NSDIG: not significant difference inside group; NSDBG: not significant difference between groups; NR: not reported; CI: confident interval. |                         |                                                            |                                                            |                                                                                                                   |                    |

## High Intensity Exercise Programmes Effects in Each Health-Related Quality of Life Dimension

Global health status is presented in Figure S1. HIEG presented a higher global health status in comparison with CG ( $p=0.0002$ , with SMD of 0.25 and a 95% CI from 0.12 to 0.39). Differences between HIEG and LMEG were not significant ( $p=0.12$ ). Improvements in Global health status were observed during ( $p=0.02$ , with SMD of 0.22 and a 95% CI from 0.03 to 0.40) and after ( $p=0.003$ , with SMD of 0.30 and a 95% CI from 0.10 to 0.50) cancer treatment. Regarding the type of interventions, only the following significant results could be reported: 1) only those programmes with resistance component achieved significant results ( $p=0.0008$ , with SMD of 0.25 and a 95% CI from 0.10 to 0.39); 2) interventions with a duration of eight weeks or less ( $p=0.04$ , with SMD of 0.23 and a 95% CI from 0.01 to 0.45), as well as longer ones ( $p=0.002$ , with SMD of 0.27 and a 95% CI from 0.10 to 0.45), are effective; 3) a frequency of 2 days/week ( $p=0.002$ , with a SMD of 0.26 and a 95% CI from 0.10 to 0.42) and also 3 days/week ( $p=0.03$ , with a SMD of 0.22 and a 95% CI from 0.02 to 0.42); 4) interventions should involve 120 minutes of exercise or more ( $p=0.03$ , with SMD of 0.18 and a 95% CI from 0.02, to 0.42); and, 5) the part of the session of high-intensity should be longer than 15 minutes ( $p=0.001$ , with a SMD of 0.32 and a 95% CI from 0.13 to 0.51), less than 15 minutes was reported as  $p=0.05$ .

**Supplementary Figure S1.** Meta-analysis results of the Global health dimension.

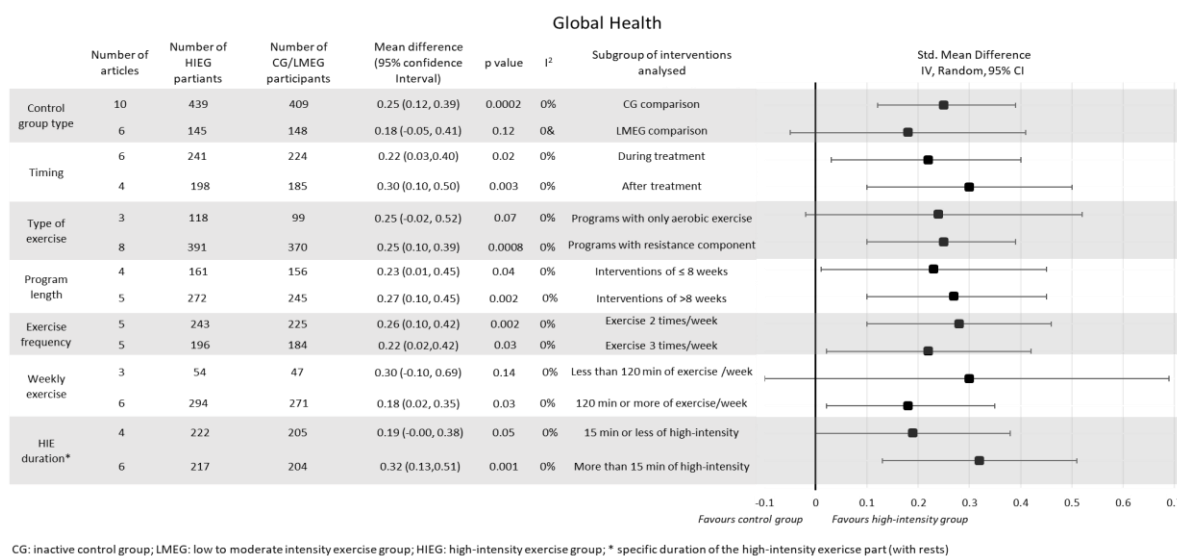

### Functional scale

Regarding physical functioning (Figure S2), HIEG significantly improved the physical component when compared to the CG ( $p=0.0009$ , with SMD of 0.30 and a 95% CI from 0.12 to 0.49). Differences between HIEG and LMEG were not significant ( $p=0.91$ ). Concerning cancer treatment timing, increases were only reached in programmes developed during treatment ( $p=0.0005$ , with SMD of 0.42 and a 95% CI from 0.18 to 0.66) but not after treatment ( $p=0.22$ ). For type of exercise, programmes with any kind of resistance training increased physical functioning significantly ( $p=0.0006$ , with SMD of 0.34 and a 95% CI from 0.15 to 0.53). In contrast, interventions with only cardiovascular training did not improve physical function ( $p=0.17$ ). The significant physical functioning improvements were dependent on the training duration: interventions of 8 weeks or less ( $p=0.04$ , with SMD of 0.04 and a 95% CI from 0.01 to 0.45), programmes with a frequency of 2 days/week ( $p=0.005$ , with SMD of 0.37 and a 95% CI from 0.11 to 0.62) and at least 120 minutes of exercise/week ( $p=0.006$ , with SMD of 0.24 and a 95% CI from 0.07 to 0.40), and work-out with a high-intensity part of the session of 15 minutes or less ( $p=0.003$ , with a SMD of 0.29 and a 95% CI from 0.10 to 0.48).

**Supplementary Figure S2.** Meta-analysis results of the Physical functioning dimension.

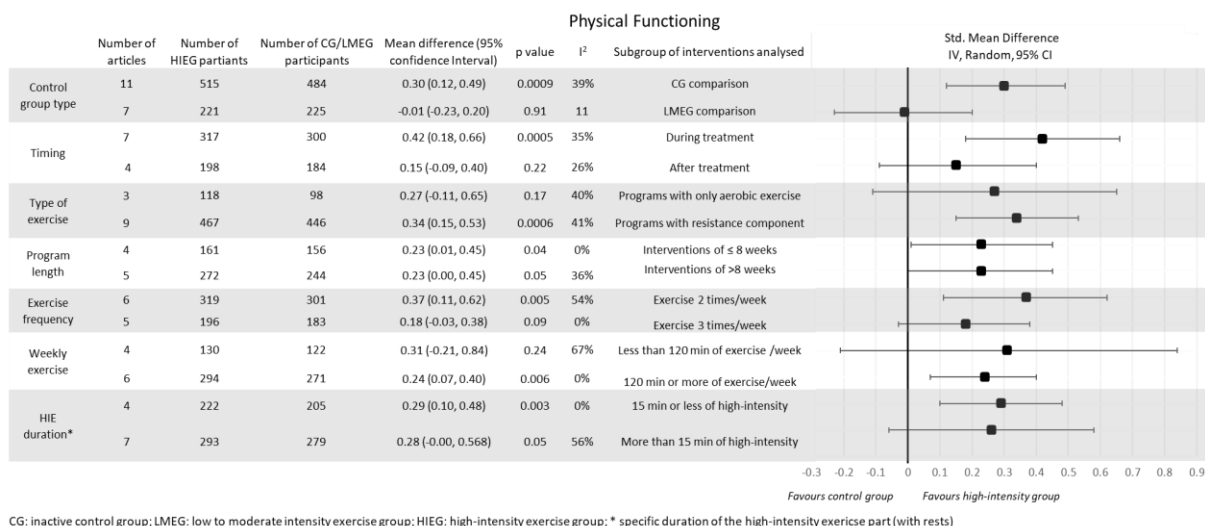

Considering the role functioning, or physical role, the HIEG showed significant enhancements versus CG ( $p=0.001$ , with SMD of 0.23 and a 95% CI from 0.09 to 0.37). Differences between HIEG and LMEG were not significant ( $p=0.15$ ) (Figure S3). As for the CG and HIEG comparison, programmes with interventions implemented during the cancer treatment had significant benefits ( $p=0.0003$ , with SMD of 0.35 and a 95% CI from 0.16 to 0.54), however, programmes that were initiated after treatment did not ( $p=0.37$ ), and only significant improvements were found in programmes of 8 weeks or less ( $P=0.02$ , with SMD of 0.26 and a 95% CI from 0.04 to 0.49), with a frequency of 3 times/week ( $P=0.04$ , with SMD of 0.21 and a 95% CI from 0.01 to 0.42) and having a high-intensity part of the session of 15 minutes or less ( $p=0.0004$ , with SMD of 0.34 and a 95% CI from 0.15 to 0.54).

**Supplementary Figure S3.** Meta-analysis results of the Role functioning/Physical role dimension.

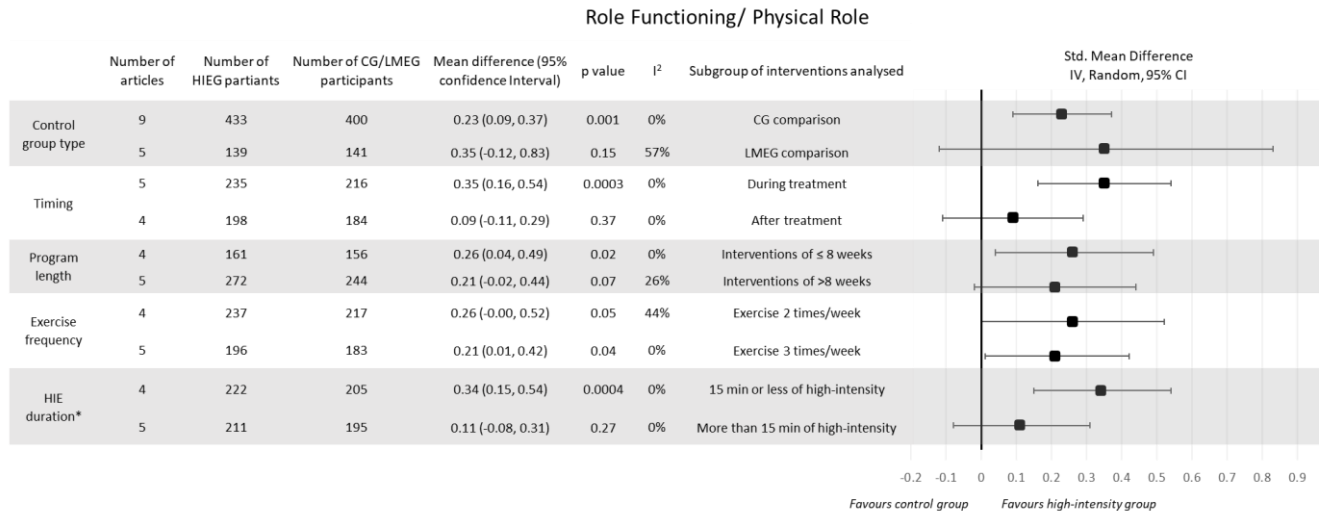

CG: inactive control group; LMEG: low to moderate intensity exercise group; HIEG: high-intensity exercise group; \* specific duration of the high-intensity exercise part (with rests)

No significant effects were noted for emotional wellbeing or mental health when comparing HIEG results with CG or with LMEG (Figure S4) as well as in the cancer treatment timing subgroup analysis. However, exercise programmes with only cardiovascular components showed positive significant differences between groups ( $p=0.007$ , with SMD of 0.36 and a 95% CI from 0.10 to 0.63) which did not occur when resistance training was used exclusively or when added ( $p=0.14$ ). No statistical differences were found in the combination of programmes according to the duration characteristics analysis done.

**Supplementary Figure S4.** Meta-analysis results of the Emotional functioning/ Wellbeing and Mental health

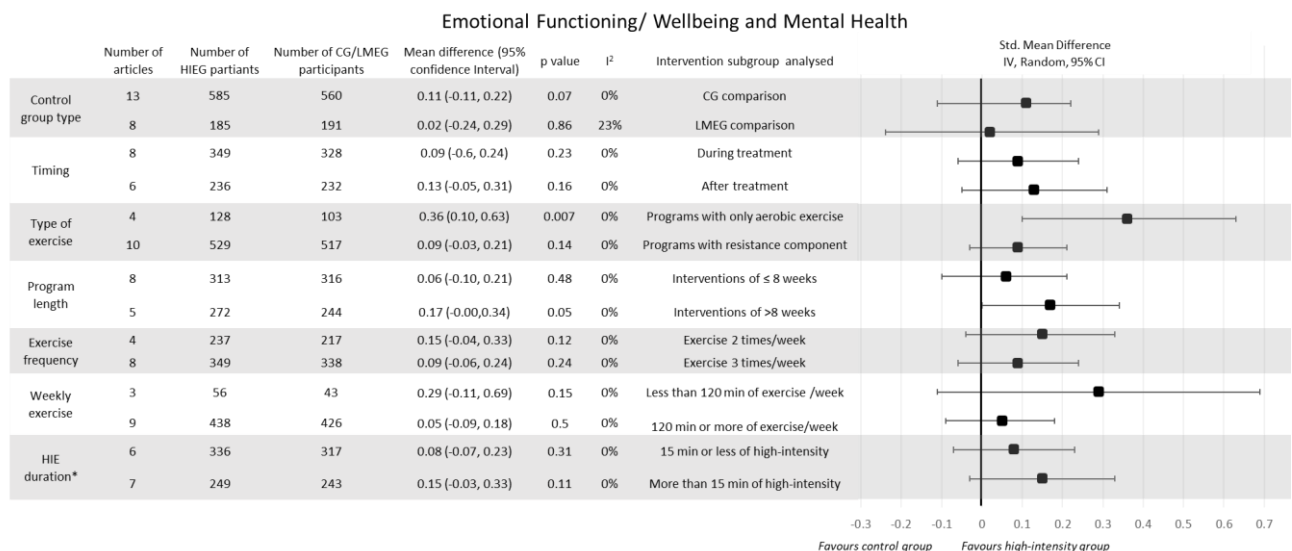

CG: inactive control group; LMEG: low to moderate intensity exercise group; HIEG: high-intensity exercise group; \* specific duration of the high-intensity exercise part (with rests)

Statistical improvements were found in cognitive functioning in the overall analysis of HIEG versus CG ( $p=0.001$ , with SMD of 0.22 and a 95% CI from -0.01 to 0.39) but not in the HIEG and LMEG comparison ( $p=0.07$ ) (Figure S5). When considering intervention duration, statistical increases were found in programmes of more than 8 weeks ( $p=0.04$ , with SMD of 0.20 and a 95% CI from 0.01 to 0.40), with an exercise frequency of 2 times/week ( $p=0.003$ , with SMD of 0.25 and a 95% CI from 0.08 to 0.42) and both, sessions with a high-intensity part of 15 minutes or less ( $p=0.04$ , with SMD of 0.20 and a 95% CI of 0.10 and a 95% CI from 0.01 to 0.39) and sessions with a longer duration of this part ( $p=0.02$ , with SMD of 0.23 and a 95% CI from 0.04 to 0.41).

**Supplementary Figure S5.** Meta-analysis results of the Cognitive functioning dimension.

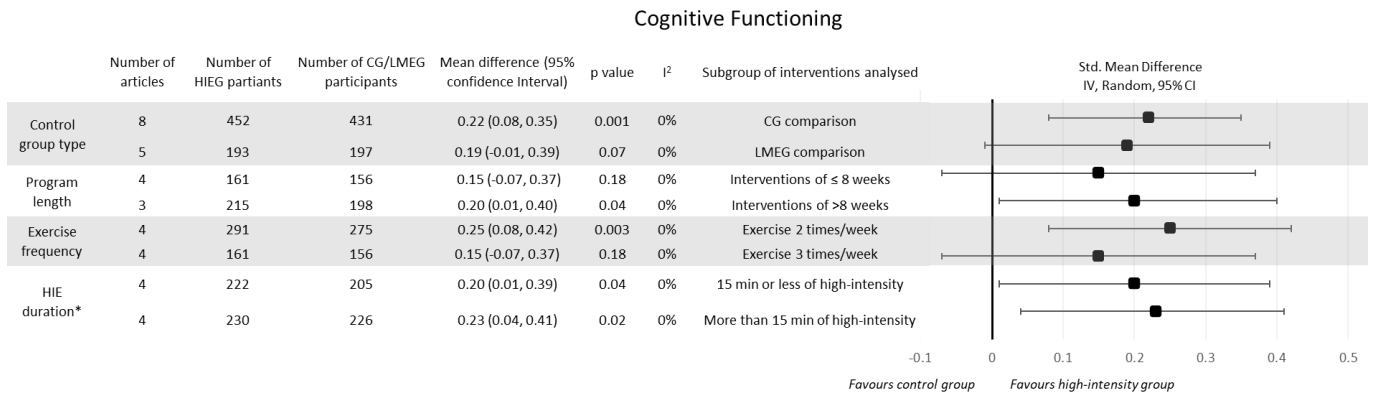

CG: inactive control group; LMEG: low to moderate intensity exercise group; HIEG: high-intensity exercise group; \* specific duration of the high-intensity exercise part (with rests)

Regarding social functioning, there were statistically significant improvements in the HIEG compared to the inactive CG ( $p=0.03$ , with SMD of 0.12 and a 95% CI from 0.01 to 0.23), but not in contrast to LMEG ( $p=0.62$ ) (Figure S6). Only those interventions carried out during the cancer treatment had significant increases ( $p=0.03$ , with SMD of 0.16 and a 95% CI from 0.01 to 0.32). Moreover, only the interventions involving just aerobic exercise reported significant enhancements in social functioning ( $p=0.03$ , with SMD of 0.29 and a 95% CI from 0.03 to 0.55). In terms of groups created based on their duration characteristics, there were no statistically significant increases in any of the analyses, except programmes with a high-intensity training component of more than 15 minutes duration ( $p=0.03$ , with SMD of 0.17 and a 95% CI from 0.01 to 0.33).

**Supplementary Figure S6.** Meta-analysis results of the Social functioning dimension.

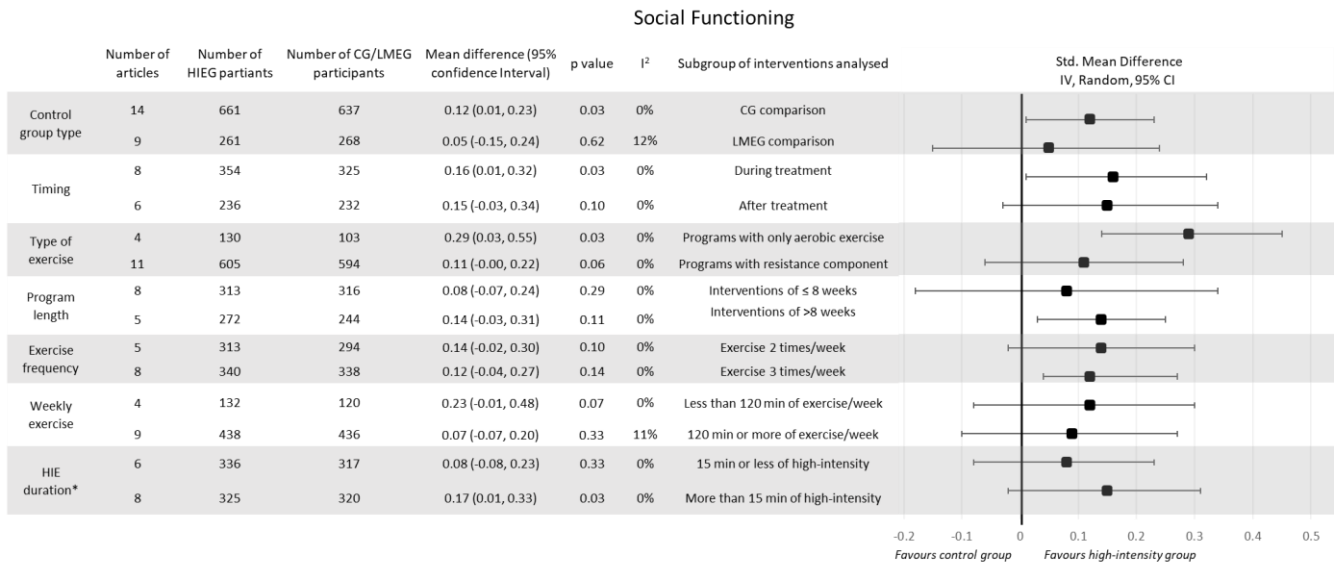

CG: inactive control group; LMEG: low to moderate intensity exercise group; HIEG: high-intensity exercise group; \* specific duration of the high-intensity exercise part (with rests)

**Symptom scale**

As for fatigue or vitality outcomes, statistical improvements were achieved when contrasting HIEG and CG outcomes ( $p<0.0001$ , with SMD of -0.32 and a 95% CI from -0.47 to -0.18) but not with the comparison to LMEG ( $p=0.62$ ) (Figure S7). All the sub-analysis related to the exercise intervention characteristic reported a significant difference between HIEG and CG. In the sub-analysis of all the comparisons related to the intervention's type of exercise and duration, statistical differences between HIEG and CG fatigue were shown. Bodily pain, dyspnea and insomnia, reported significant improvement in the overall comparison of HIEG and CG only ( $p=0.02$ , with SMD of -0.18 and a 95% CI from -0.21 to -0.02 in pain analysis;  $p=0.002$  with SMD of -0.34 and a 95% CI from -0.55 to -0.13 in the dyspnoea results and  $p=0.003$ , with SMD of -0.29 and a 95% CI from -0.47 to -0.10 in insomnia) (Figures S8 and S9). Thus, in diarrhoea, nausea, constipation and appetite loss significant increases after exercise interventions were not achieved in any of the analyses realized (Figures S9 and S10)



**Supplementary Figure S7. Meta-analysis results of the Fatigue/ Vitality dimension.**

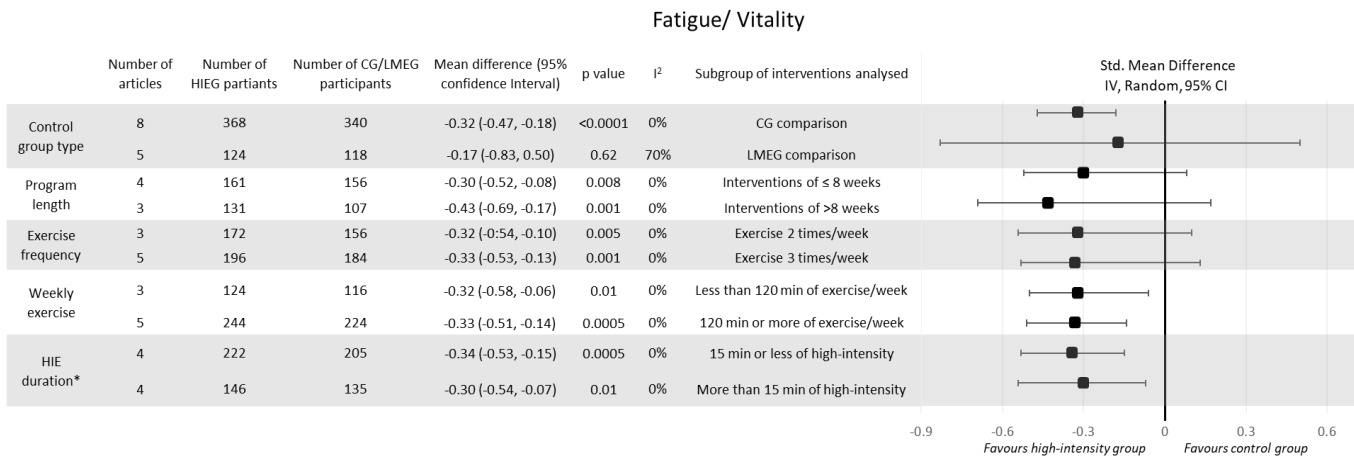

CG: inactive control group; LMEG: low to moderate intensity exercise group; HIEG: high-intensity exercise group; \* specific duration of the high-intensity exercise part (with rests)

**Supplementary Figure S8. Meta-analysis results of the Bodily Pain dimension.**

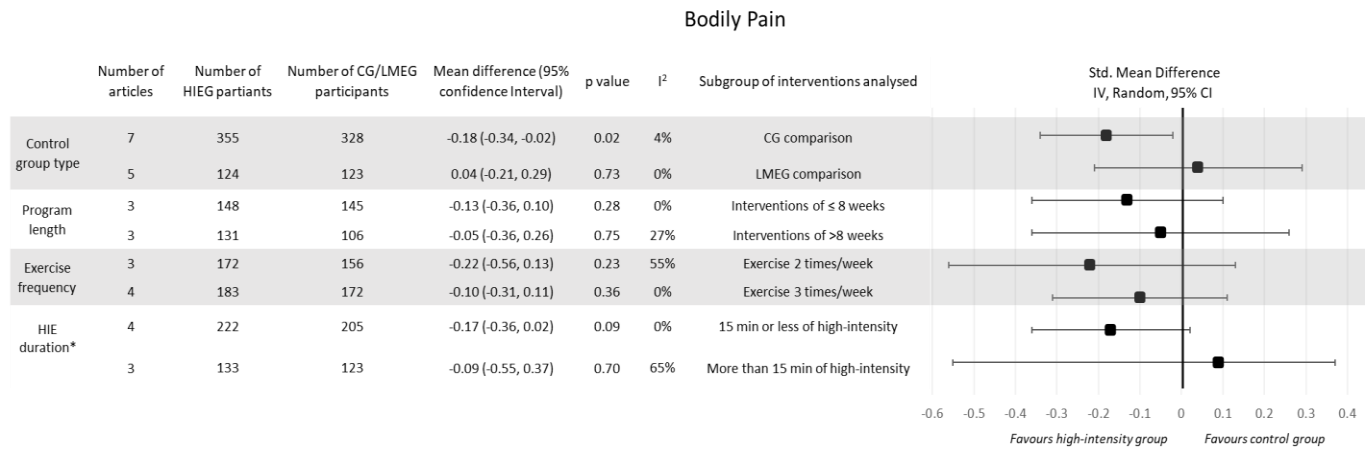

CG: inactive control group; LMEG: low to moderate intensity exercise group; HIEG: high-intensity exercise group; \* specific duration of the high-intensity exercise part (with rests)

**Supplementary Figure S9. Meta-analysis results of the Dyspnoea, Diarrhoea and Nausea and vomiting dimensions.**

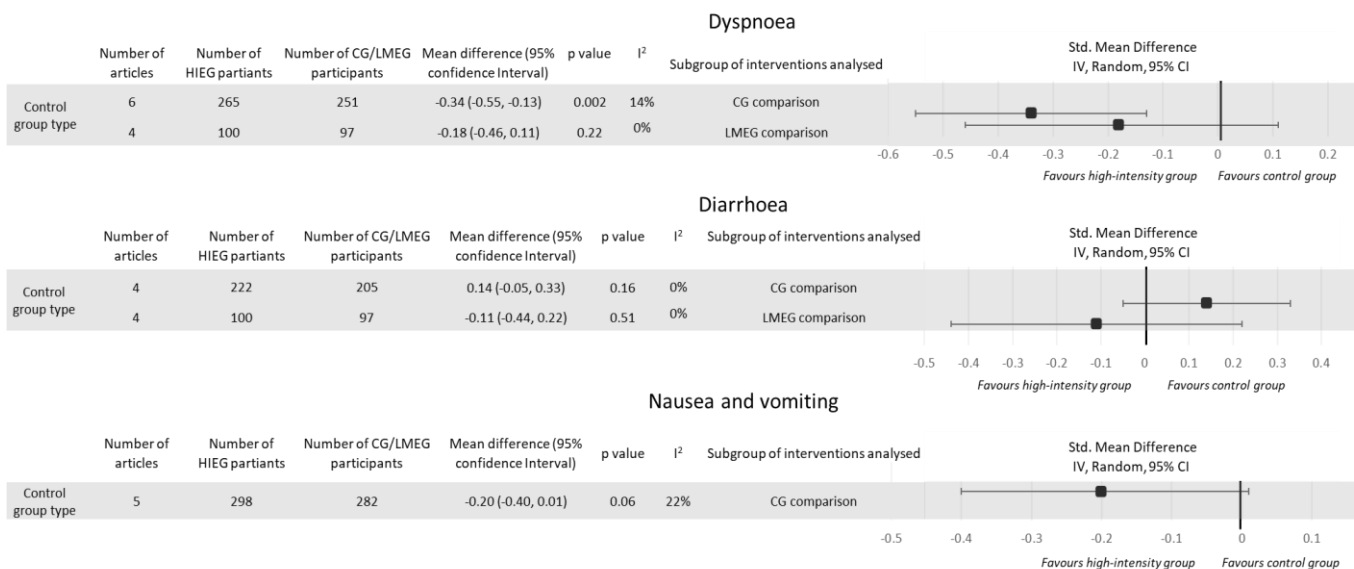

CG: inactive control group; LMEG: low to moderate intensity exercise group; HIEG: high-intensity exercise group.

## Supplementary Figure S10. Meta-analysis results of the Insomnia, Constipation and Appetite loss dimensions.

### Insomnia

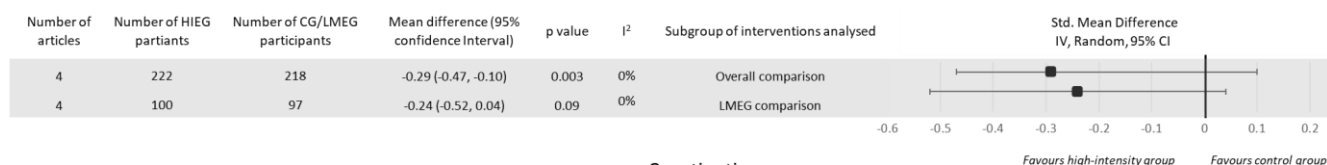

### Constipation

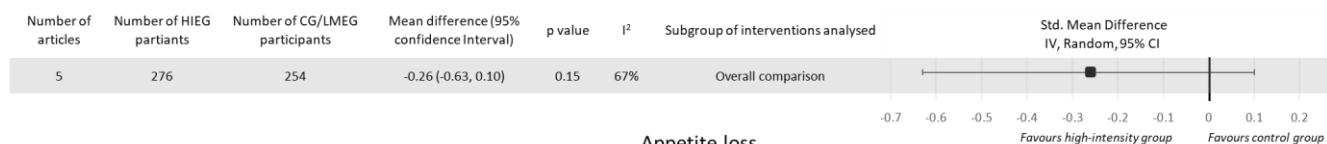

### Appetite loss

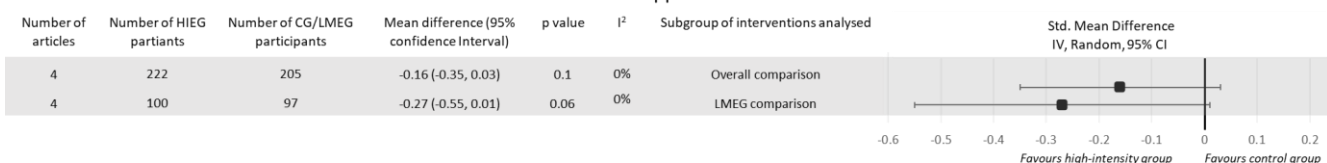

CG: inactive control group; LMEG: low to moderate intensity exercise group; HIEG: high-intensity exercise group.

## META-ANALYSIS RESULTS

**Supplementary Figure S11:** Effects in the global health dimension of the comparisons between high-intensity training group and control group, and high-intensity training group and low-intensity exercise group.

Global health dimension: Comparison between high-intensity group and control group

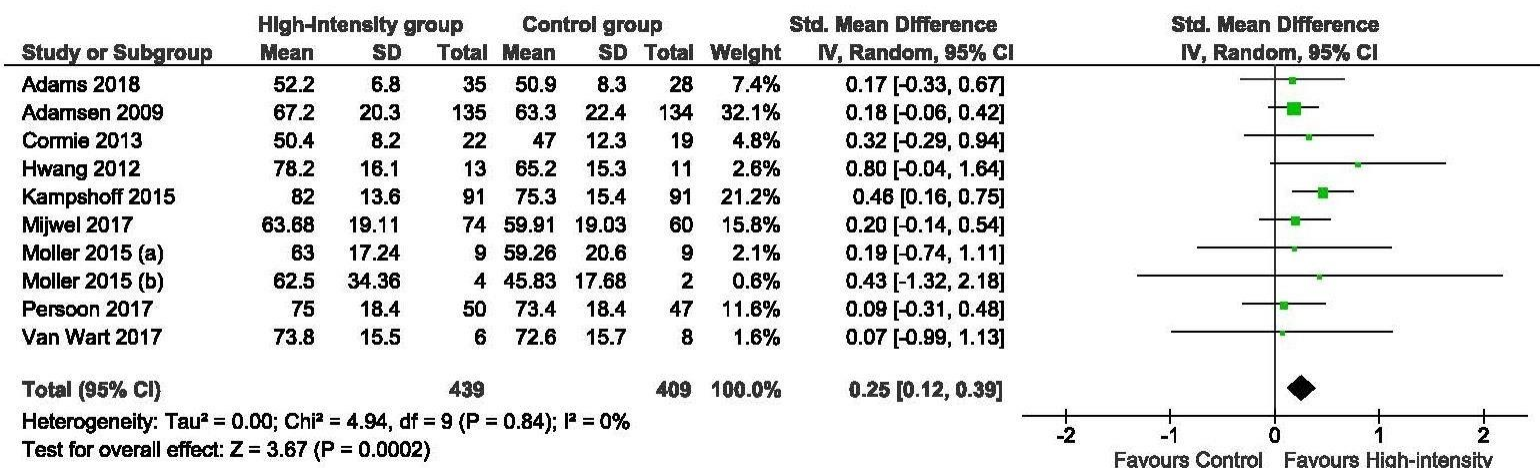

Global health dimension: Comparison between high-intensity group and low-moderate intensity group

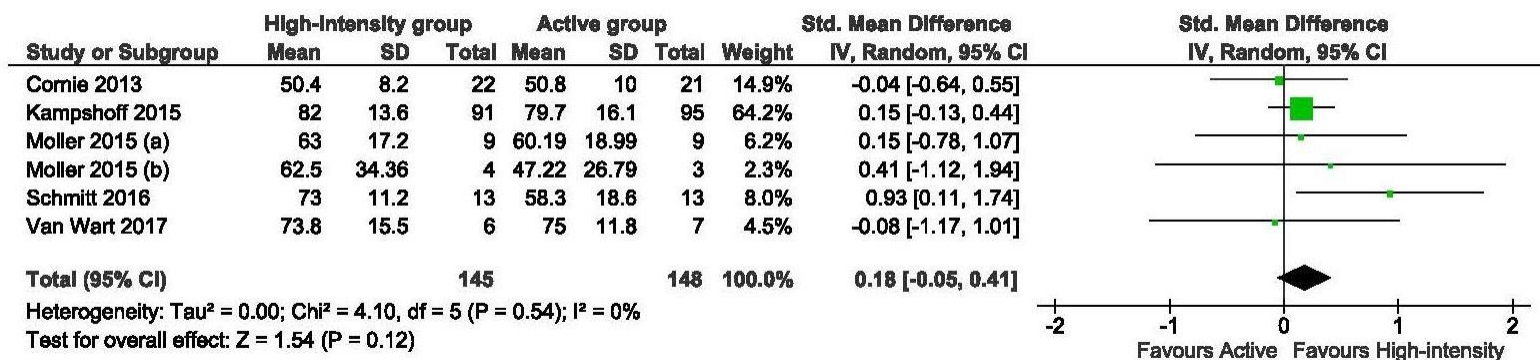

**Supplementary Figure S12:** Effects of high-intensity training in global health according to the treatment timing.

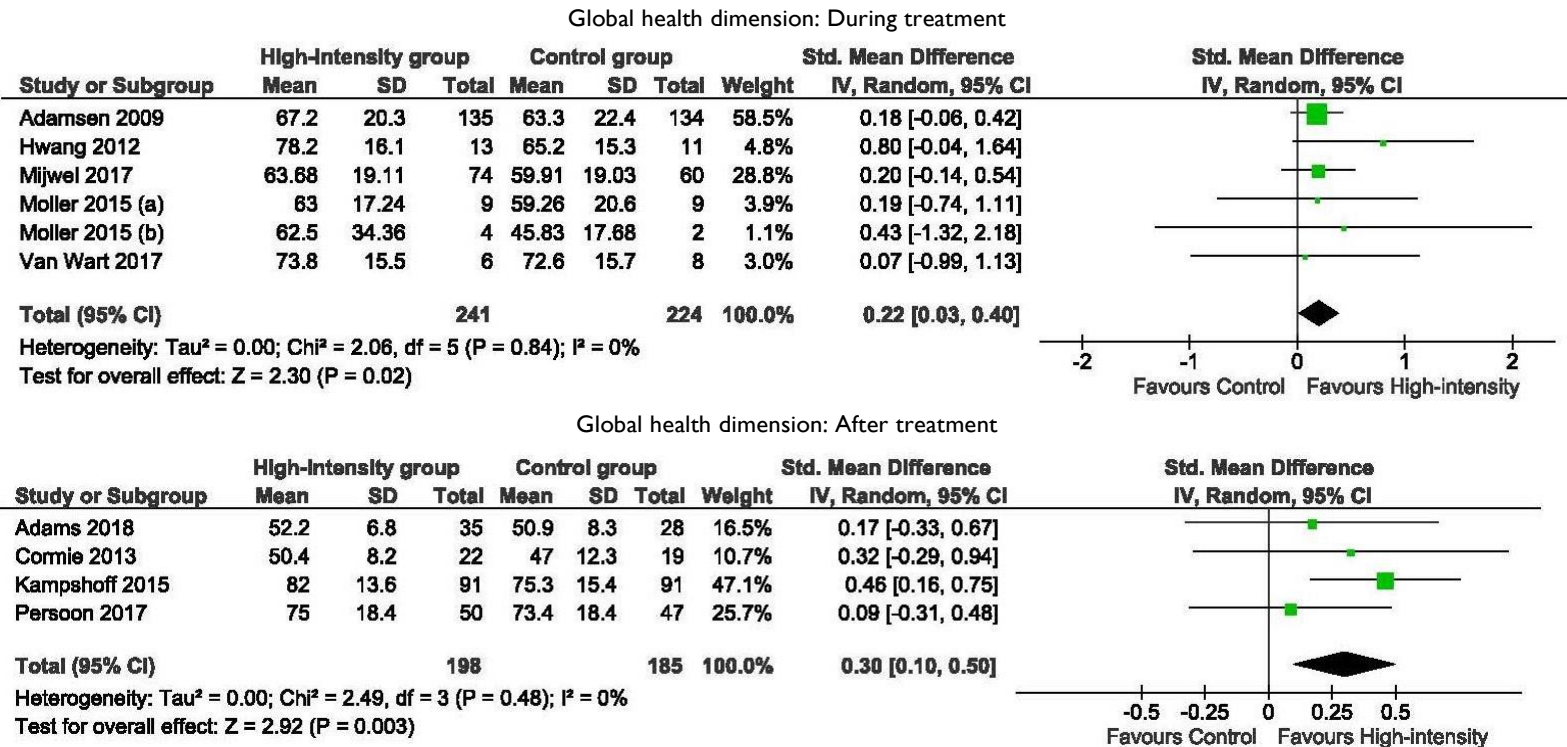

**Supplementary Figure S13:** Effects of the type of exercise in global health dimension.

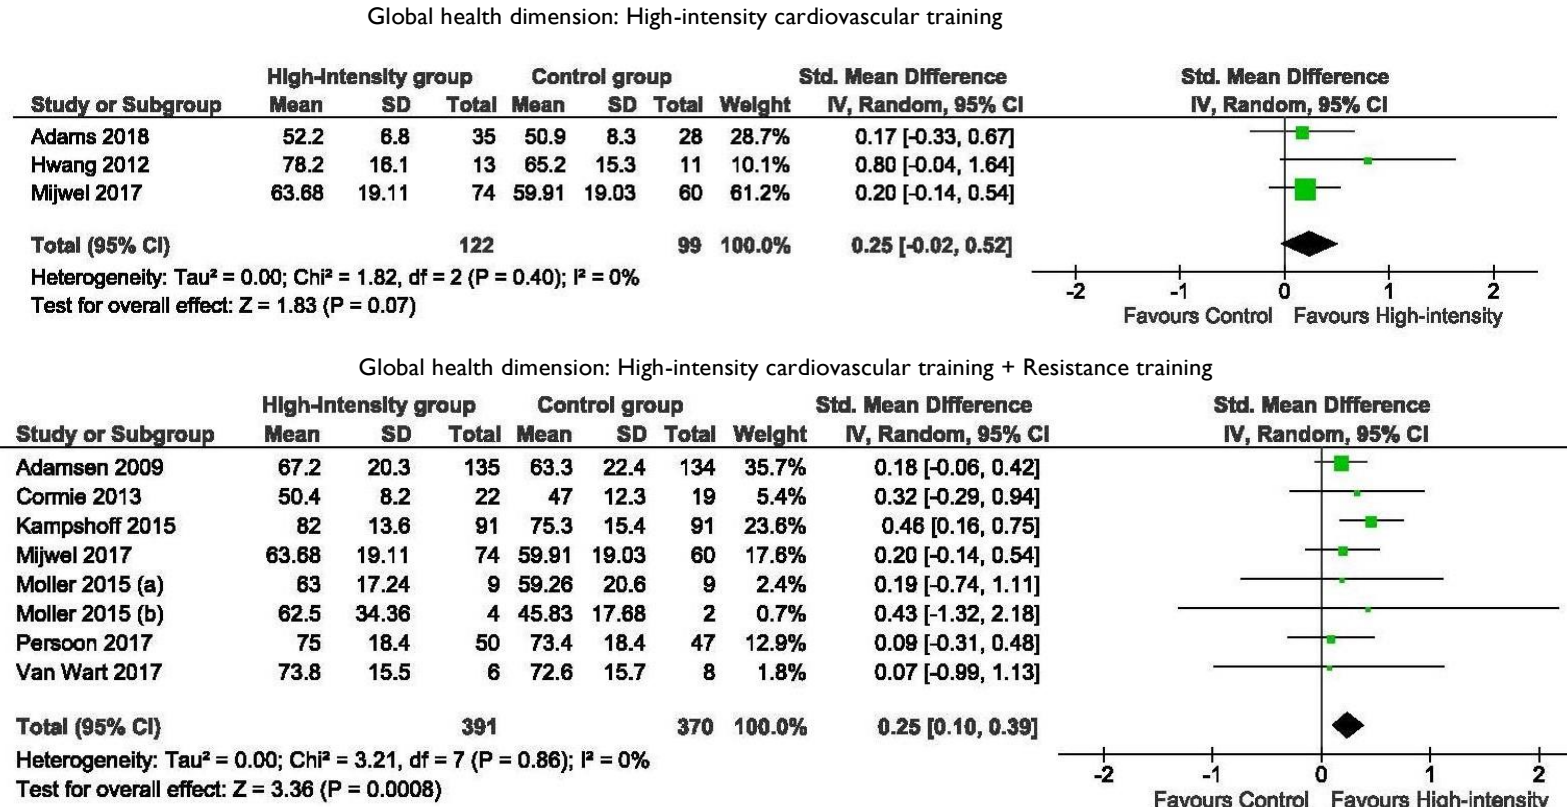



**Supplementary Figure S14:** Effects of the exercise programs length in global health dimension.

Global health dimension: Eight weeks of exercise program or less

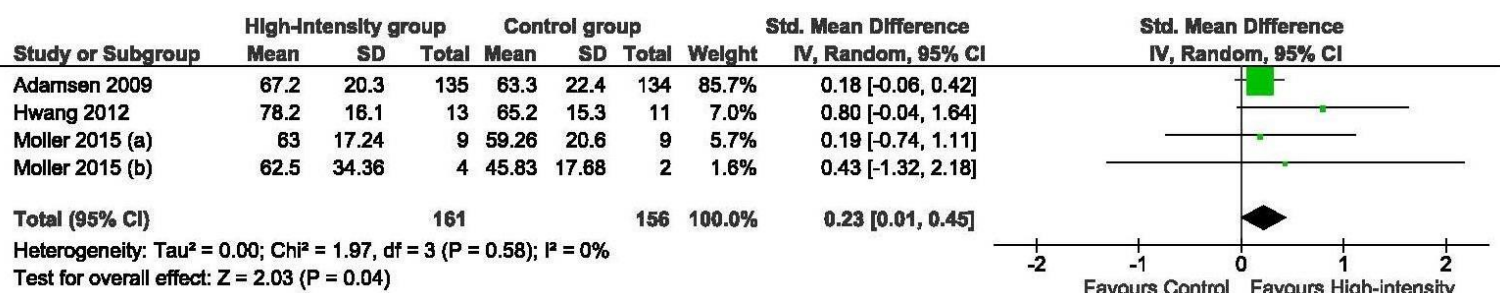

Global health dimension: More than eight weeks of exercise program

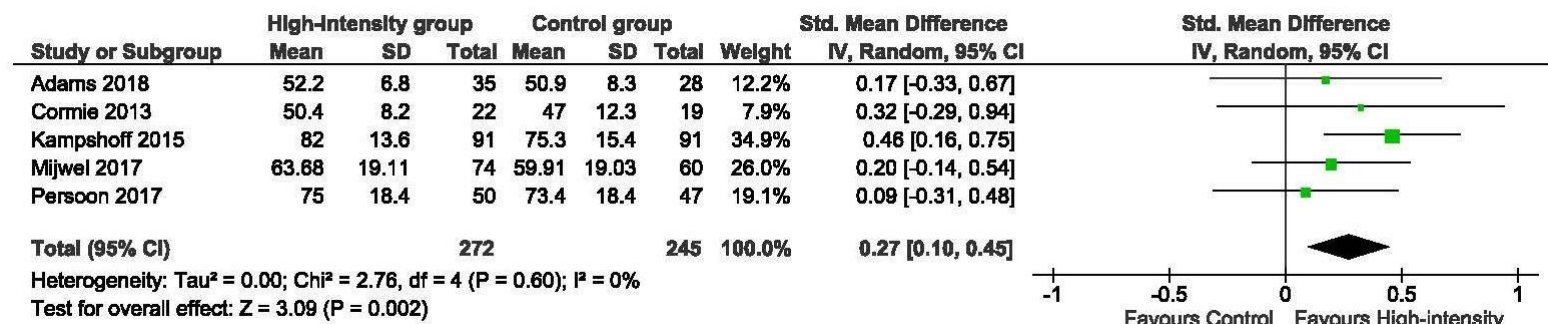

**Supplementary Figure S15:** Effects of the weekly exercise frequency in global health dimension

Global health dimension: 2 times per week

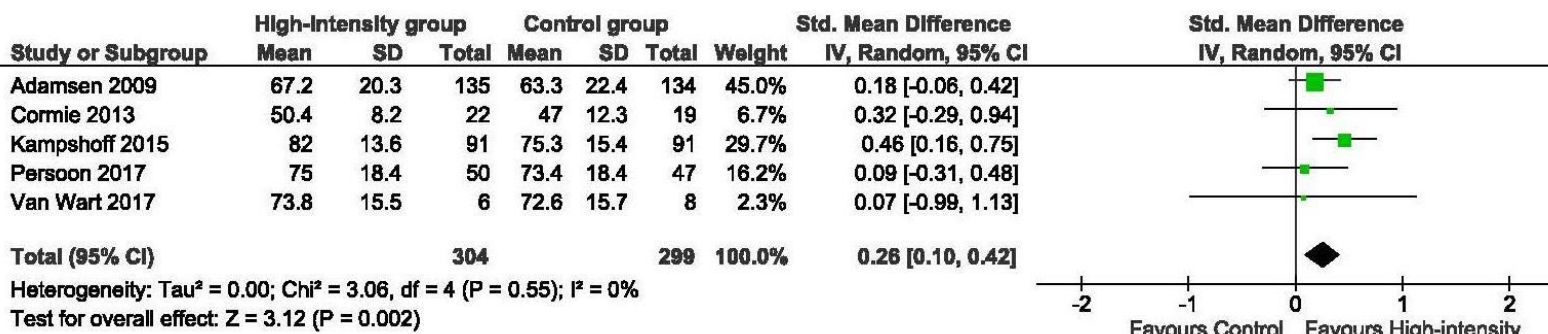

Global health dimension: 3 times per week

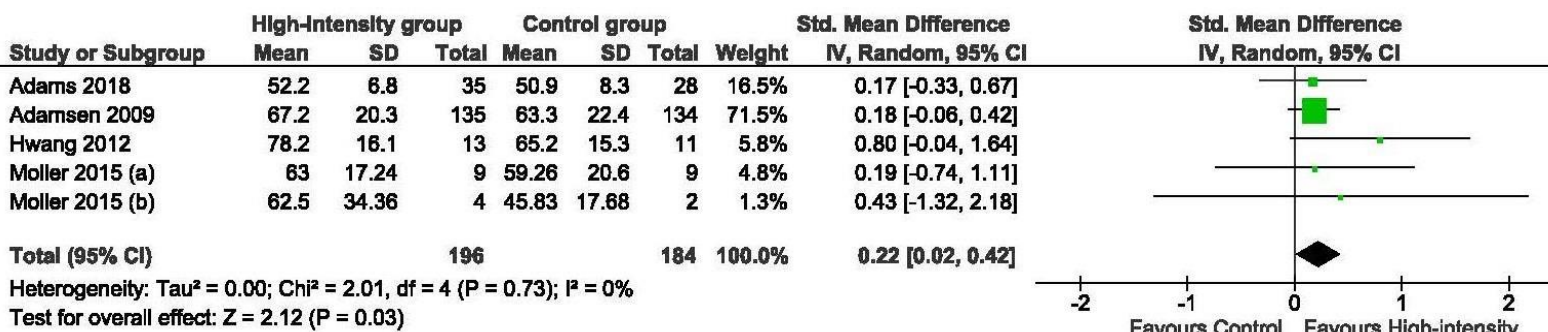

**Supplementary Figure S16:** Effects of training minutes per week in global health dimension.

Global health dimension: Less than 120 minutes of exercise per weeks

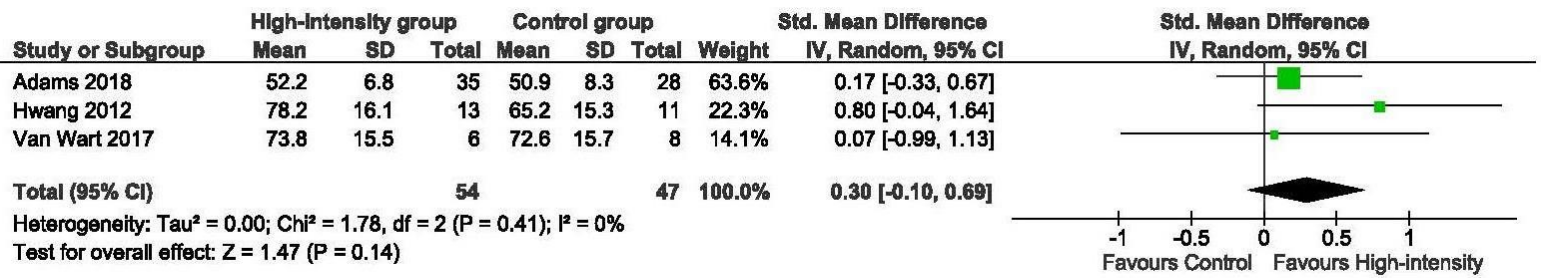

Global health dimension: 120 minutes or more of exercise per weeks

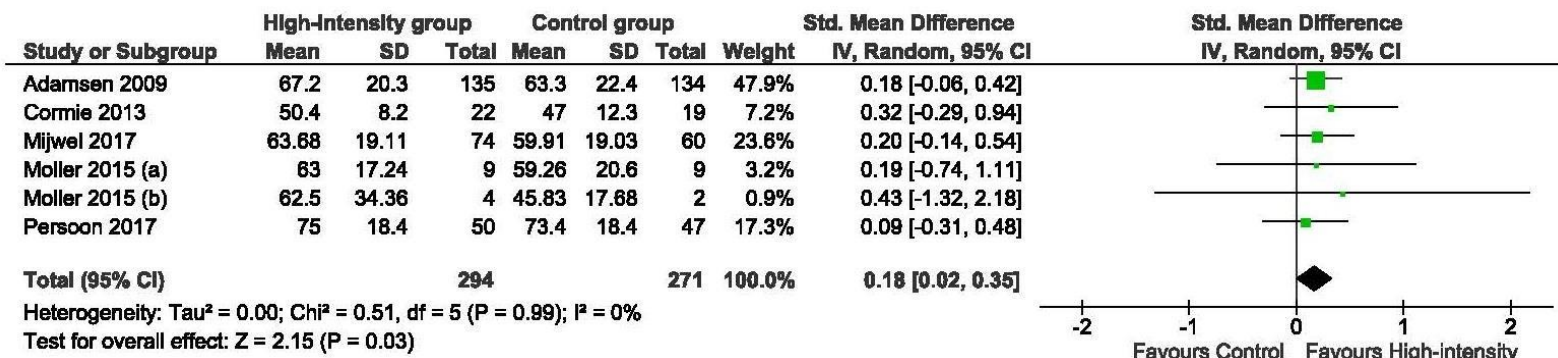

**Supplementary Figure S17:** Effects of the high-intensity training part duration in global health dimension.

Global health: 15 minutes or less of high-intensity training

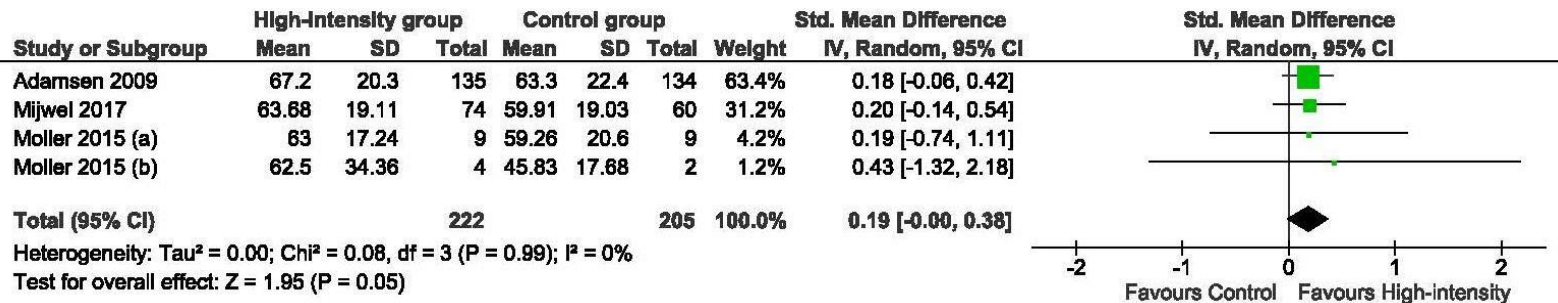

Global health: More than 15 minutes of high-intensity training

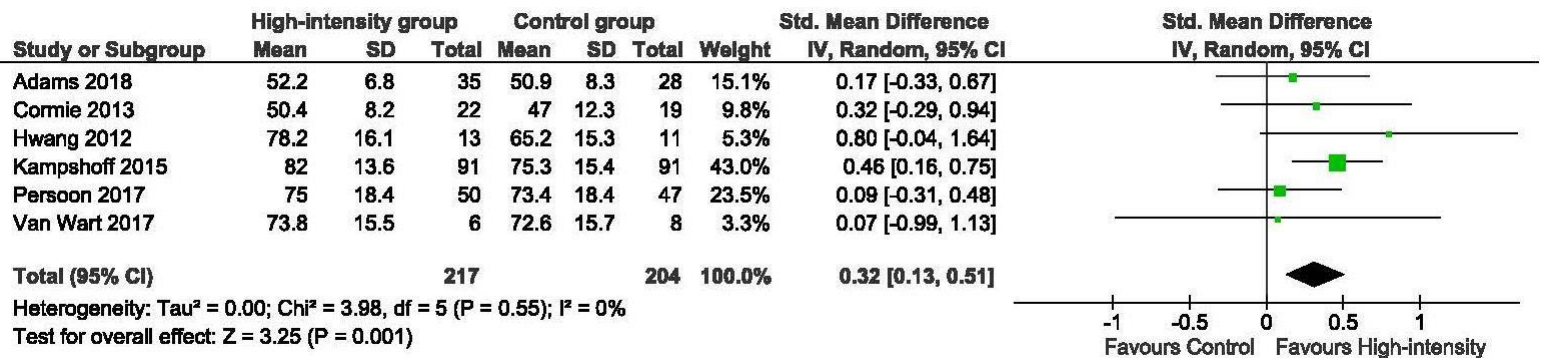



**Supplementary Figure S18:** Effects in the physical functioning dimension of the comparisons between high-intensity training group and control group, and high-intensity training group and low-intensity exercise group.

Physical functioning dimension: Comparison between high-intensity group and control group.

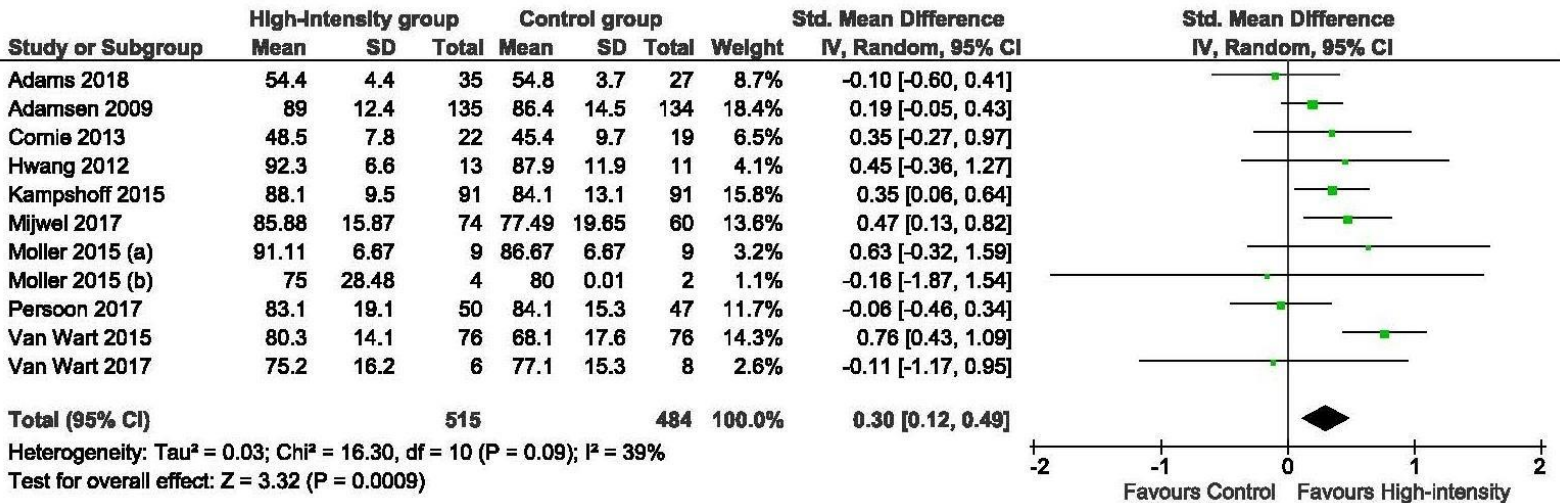

Physical functioning dimension: Comparison between high-intensity group and low-moderate intensity group

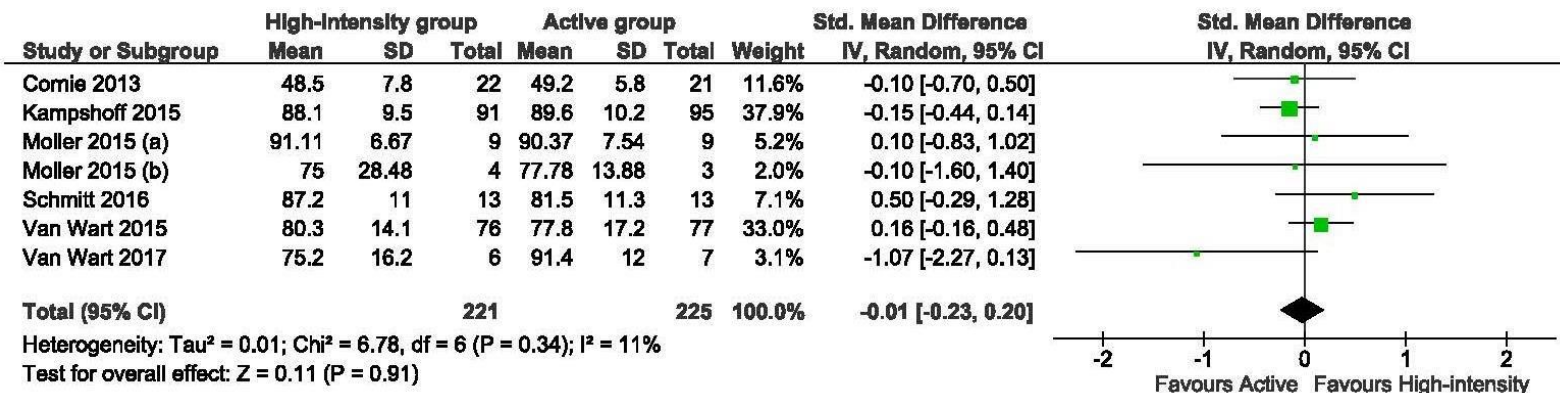

**Supplementary Figure S19:** Effects of high-intensity training in physical functioning according to the treatment timing

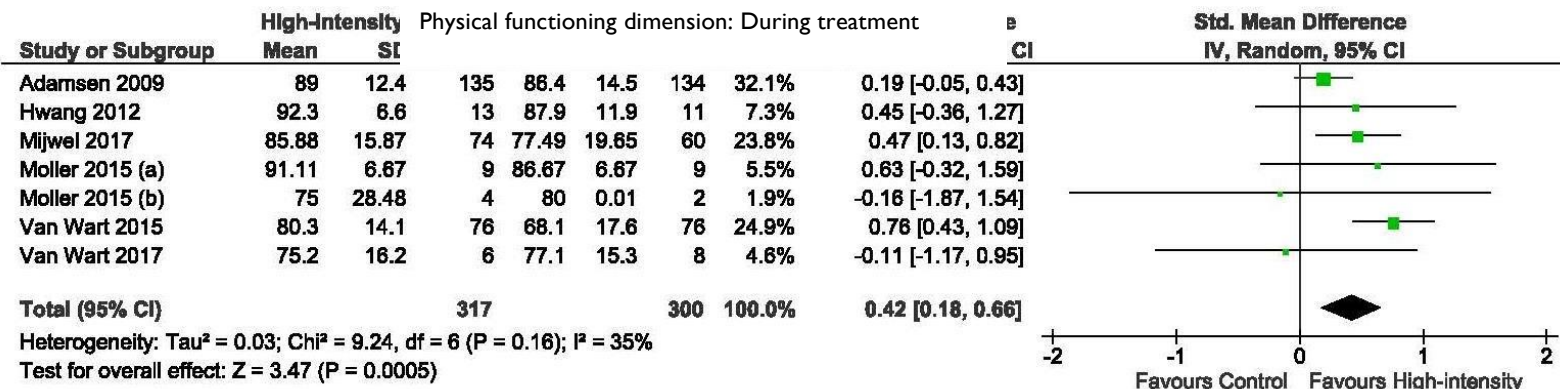

Physical functioning dimension: After treatment

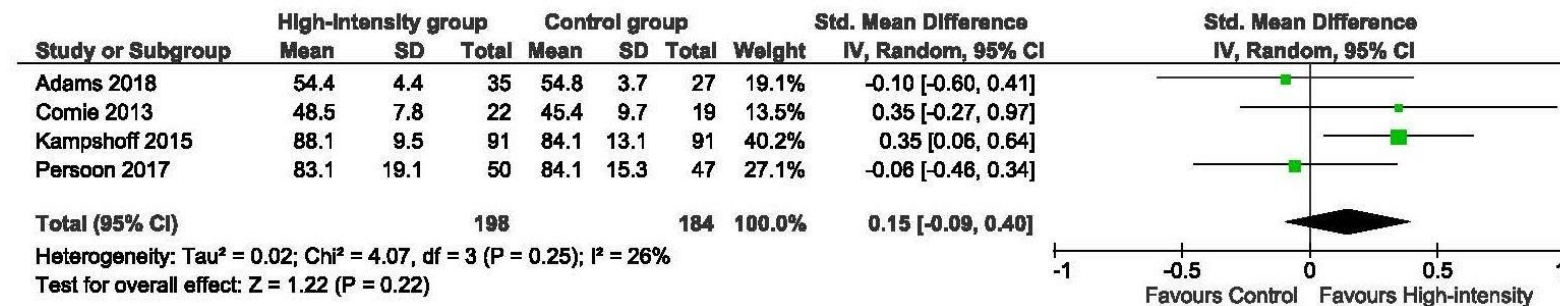



**Supplementary Figure S20:** Effects of the type of exercise in physical functioning dimension.

Physical functioning: High-intensity cardiovascular training

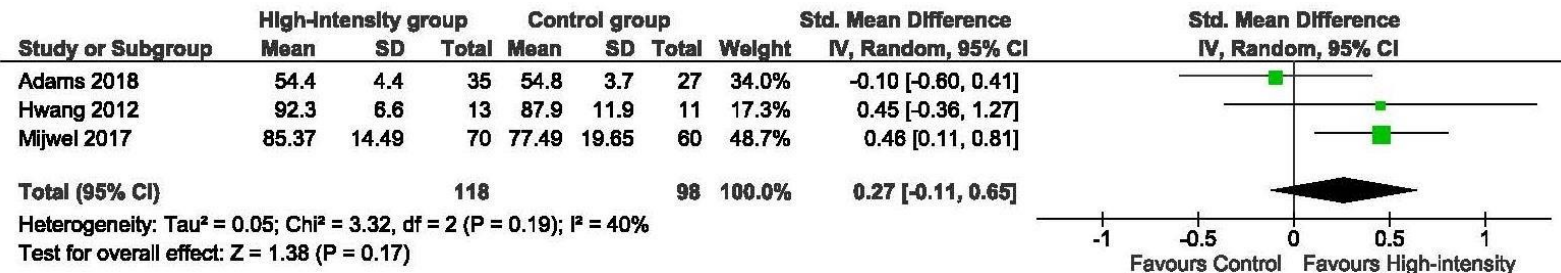

Physical functioning: High-intensity cardiovascular training + Resistance training

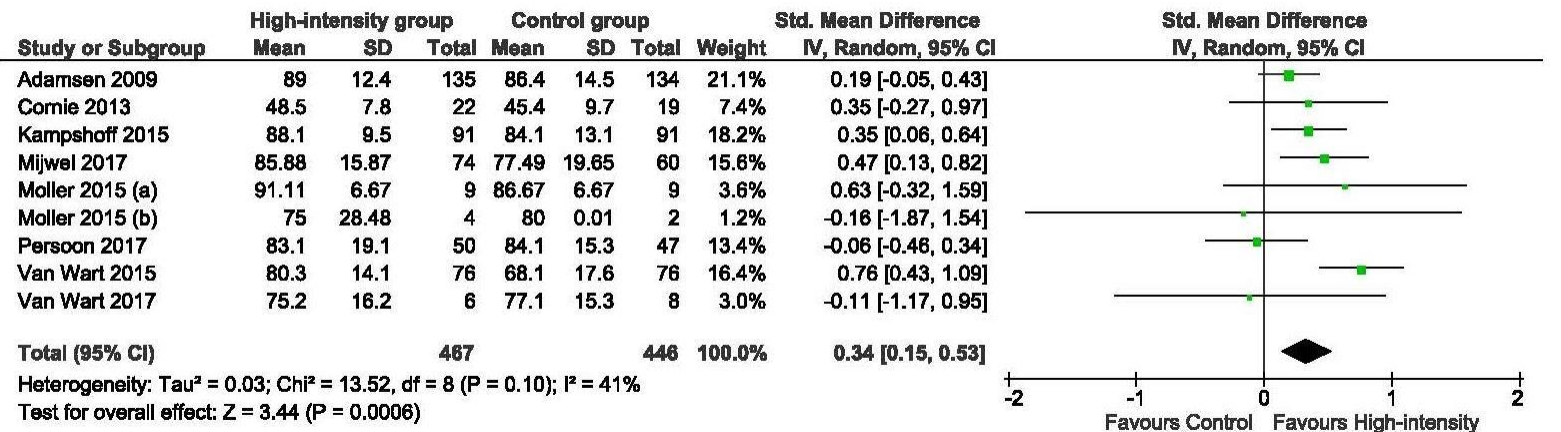

**Supplementary Figure S21:** Effects of the exercise programs length physical functioning dimension.

Physical functioning dimension: Eight weeks of exercise program or less

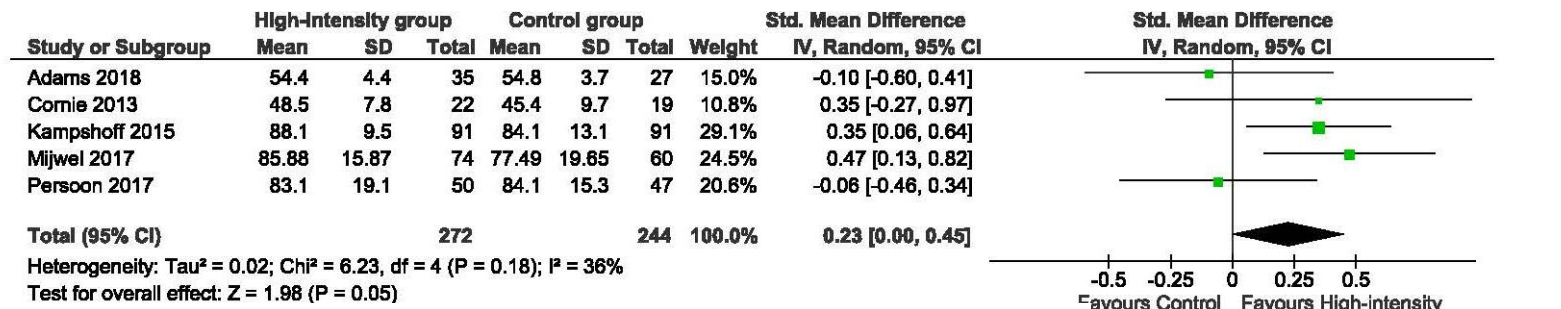

Physical functioning dimension: More than eight weeks of exercise program

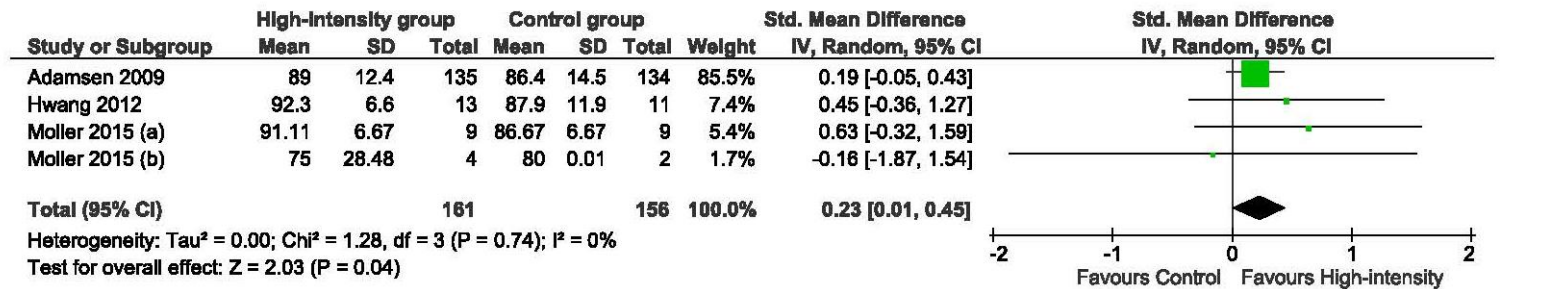

**Supplementary Figure S22:** Effects of the weekly exercise frequency in physical functioning dimension

Physical functioning dimension: 2 times per week

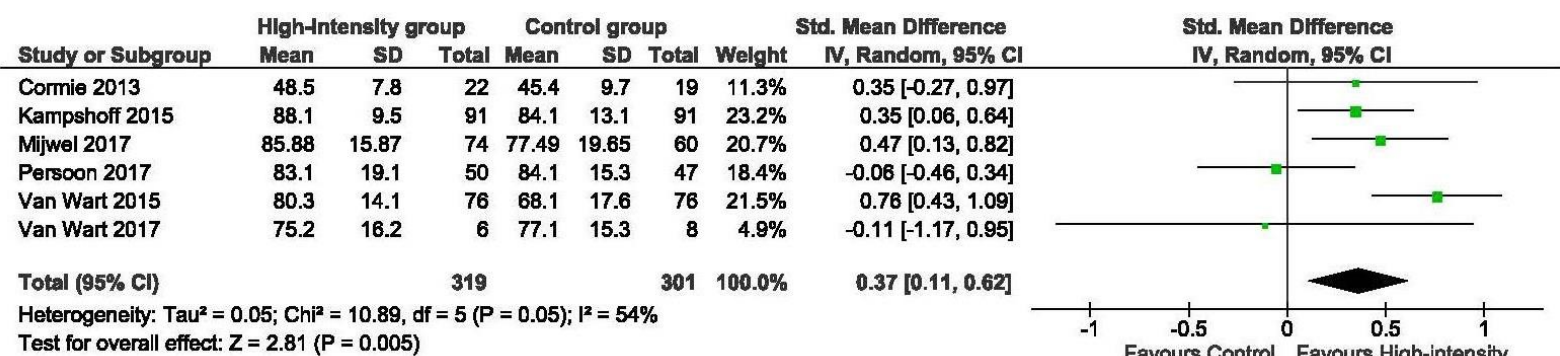

Physical functioning dimension: 3 times per week

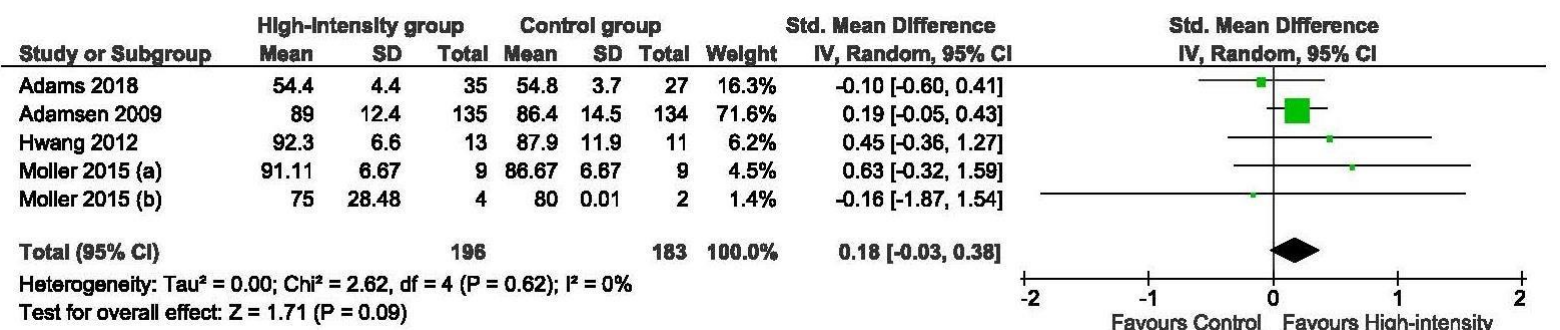

**Supplementary Figure S23:** Effects of training minutes per week in physical functioning dimension.

Physical functioning dimension: Less than 120 minutes of exercise per weeks

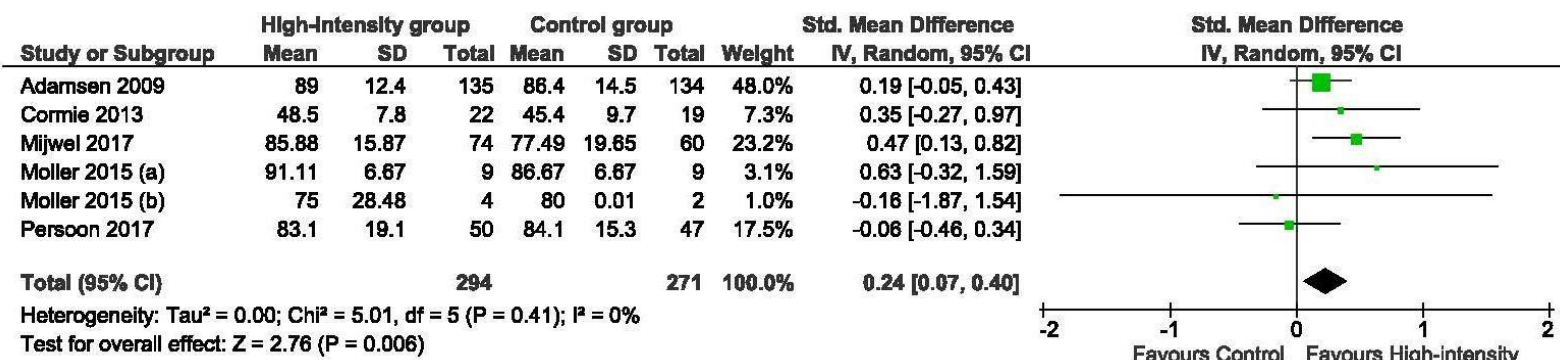

Physical functioning dimension: 120 minutes or more or exercise per weeks

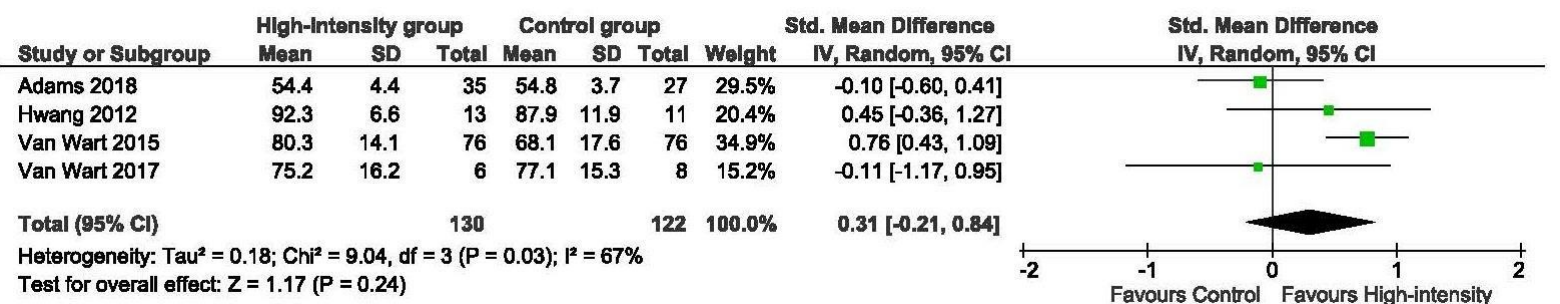



**Supplementary Figure S24:** Effects of the high-intensity training part duration in physical functioning dimension

Physical functioning dimension: 15 minutes or less of high-intensity training

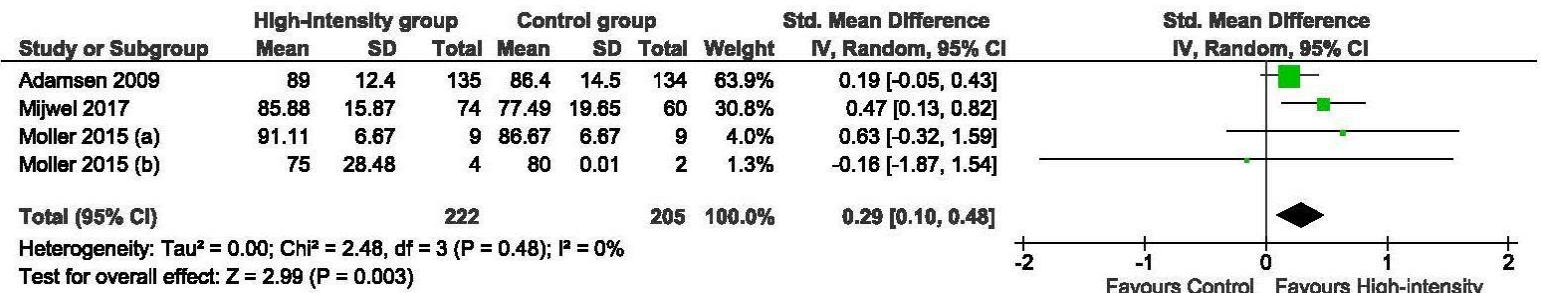

Physical functioning dimension: More than 15 minutes of high-intensity training

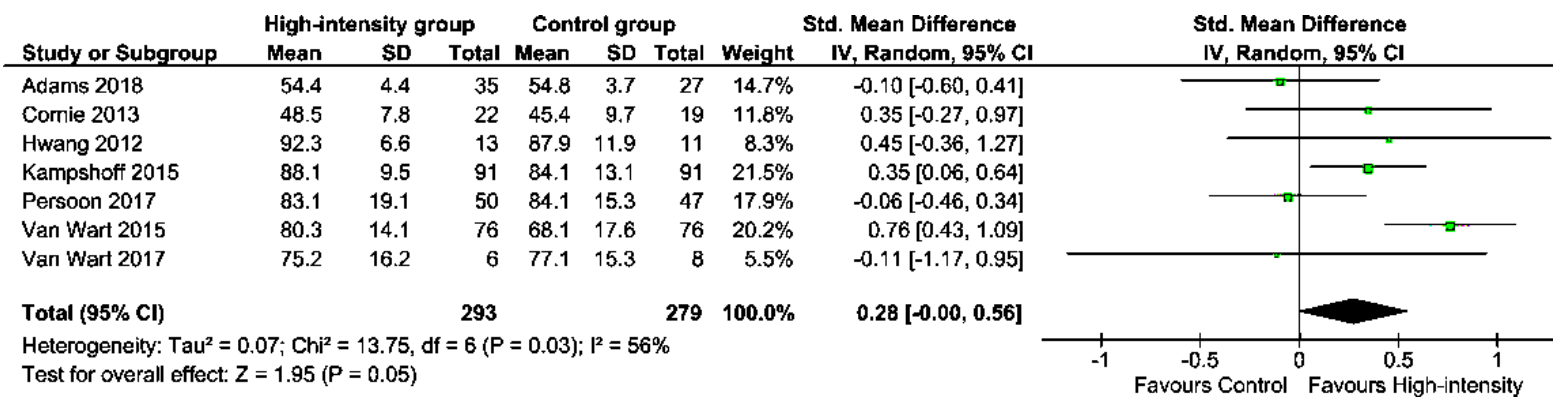

**Supplementary Figure S25:** Effects in the role functioning dimension of the comparisons between high-intensity training group and control group, and high-intensity training group and low-intensity exercise group.

Role functioning dimension: Comparison between high-intensity group and control group

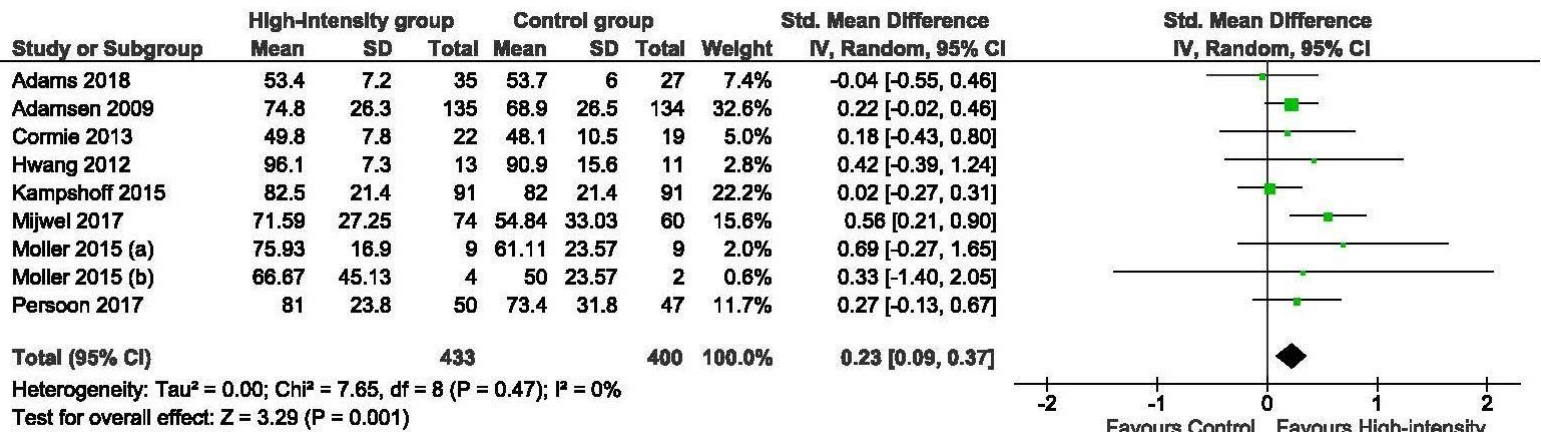

Role functioning dimension: Comparison between high-intensity group and low-moderate intensity group

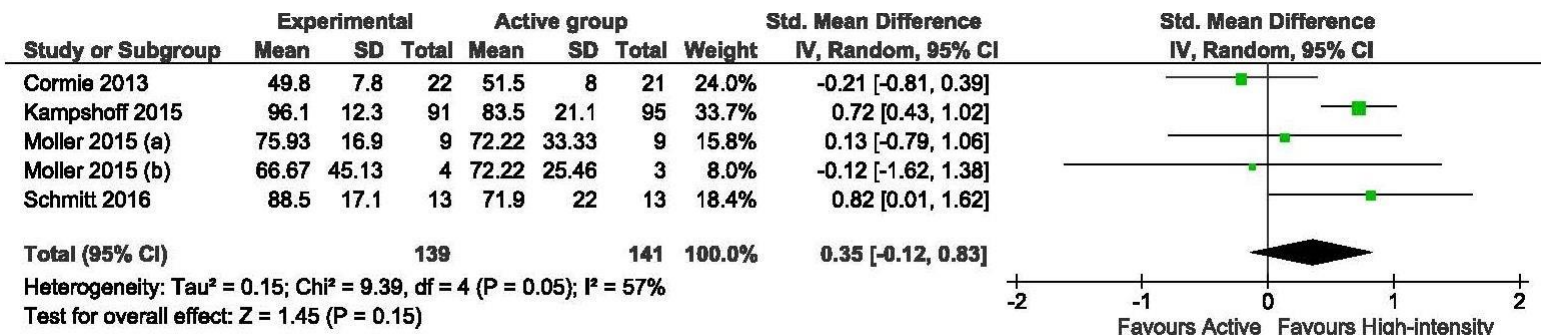

**Supplementary Figure S26:** Effects of high-intensity training in role functioning according to the treatment timing.

Role functioning dimension: During treatment

| Study or Subgroup     | High-Intensity group |      |            | Control group |      |            | Weight        | Std. Mean Difference |                      |
|-----------------------|----------------------|------|------------|---------------|------|------------|---------------|----------------------|----------------------|
|                       | Mean                 | SD   | Total      | Mean          | SD   | Total      |               | IV, Random, 95% CI   | 95% CI               |
| Adams 2018            | 53.4                 | 7.2  | 35         | 53.7          | 6    | 27         | 16.1%         | -0.04                | [-0.55, 0.46]        |
| Cornie 2013           | 49.8                 | 7.8  | 22         | 48.1          | 10.5 | 19         | 10.7%         | 0.18                 | [-0.43, 0.80]        |
| Kampshoff 2015        | 82.5                 | 21.4 | 91         | 82            | 21.4 | 91         | 48.0%         | 0.02                 | [-0.27, 0.31]        |
| Persoon 2017          | 81                   | 23.8 | 50         | 73.4          | 31.8 | 47         | 25.3%         | 0.27                 | [-0.13, 0.67]        |
| <b>Total (95% CI)</b> |                      |      | <b>198</b> |               |      | <b>184</b> | <b>100.0%</b> | <b>0.09</b>          | <b>[-0.11, 0.29]</b> |

Heterogeneity: Tau<sup>2</sup> = 0.00; Chi<sup>2</sup> = 1.34, df = 3 (P = 0.72); I<sup>2</sup> = 0%  
 Test for overall effect: Z = 0.89 (P = 0.37)

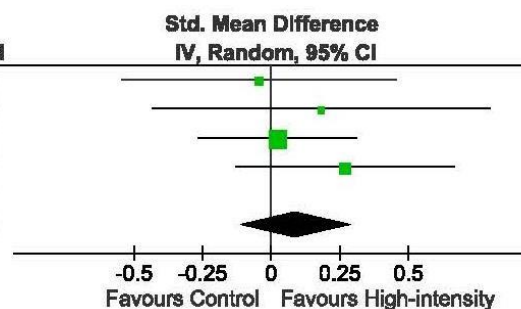

Role functioning dimension: After treatment

| Study or Subgroup     | High-Intensity group |       |            | Control group |       |            | Weight        | Std. Mean Difference |                     |
|-----------------------|----------------------|-------|------------|---------------|-------|------------|---------------|----------------------|---------------------|
|                       | Mean                 | SD    | Total      | Mean          | SD    | Total      |               | IV, Random, 95% CI   | 95% CI              |
| Adamsen 2009          | 74.8                 | 26.3  | 135        | 68.9          | 26.5  | 134        | 60.8%         | 0.22                 | [-0.02, 0.46]       |
| Hwang 2012            | 96.1                 | 7.3   | 13         | 90.9          | 15.6  | 11         | 5.3%          | 0.42                 | [-0.39, 1.24]       |
| Mijwel 2017           | 71.59                | 27.25 | 74         | 54.84         | 33.03 | 60         | 29.0%         | 0.56                 | [0.21, 0.90]        |
| Moller 2015 (a)       | 75.93                | 16.9  | 9          | 61.11         | 23.57 | 9          | 3.8%          | 0.69                 | [-0.27, 1.65]       |
| Moller 2015 (b)       | 66.67                | 45.13 | 4          | 50            | 23.57 | 2          | 1.2%          | 0.33                 | [-1.40, 2.05]       |
| <b>Total (95% CI)</b> |                      |       | <b>235</b> |               |       | <b>216</b> | <b>100.0%</b> | <b>0.35</b>          | <b>[0.16, 0.54]</b> |

Heterogeneity: Tau<sup>2</sup> = 0.00; Chi<sup>2</sup> = 2.94, df = 4 (P = 0.57); I<sup>2</sup> = 0%  
 Test for overall effect: Z = 3.66 (P = 0.0003)

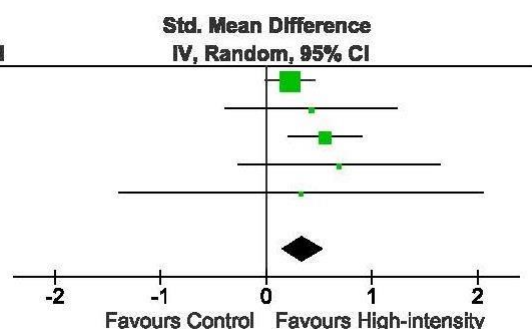

**Supplementary Figure S27:** Effects of the exercise programs length in role functioning dimension.

Role functioning dimension: Eight weeks of exercise program or less

| Study or Subgroup     | High-Intensity group |       |            | Control group |       |            | Weight        | Std. Mean Difference |                     |
|-----------------------|----------------------|-------|------------|---------------|-------|------------|---------------|----------------------|---------------------|
|                       | Mean                 | SD    | Total      | Mean          | SD    | Total      |               | IV, Random, 95% CI   | 95% CI              |
| Adamsen 2009          | 74.8                 | 26.3  | 135        | 68.9          | 26.5  | 134        | 85.6%         | 0.22                 | [-0.02, 0.46]       |
| Hwang 2012            | 96.1                 | 7.3   | 13         | 90.9          | 15.6  | 11         | 7.4%          | 0.42                 | [-0.39, 1.24]       |
| Moller 2015 (a)       | 75.93                | 16.9  | 9          | 61.11         | 23.57 | 9          | 5.4%          | 0.69                 | [-0.27, 1.65]       |
| Moller 2015 (b)       | 66.67                | 45.13 | 4          | 50            | 23.57 | 2          | 1.7%          | 0.33                 | [-1.40, 2.05]       |
| <b>Total (95% CI)</b> |                      |       | <b>161</b> |               |       | <b>156</b> | <b>100.0%</b> | <b>0.26</b>          | <b>[0.04, 0.49]</b> |

Heterogeneity: Tau<sup>2</sup> = 0.00; Chi<sup>2</sup> = 1.02, df = 3 (P = 0.80); I<sup>2</sup> = 0%  
 Test for overall effect: Z = 2.34 (P = 0.02)

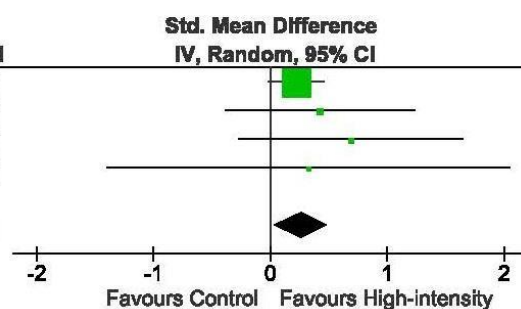

Role functioning dimension: More than eight weeks of exercise program

| Study or Subgroup     | High-Intensity group |       |            | Control group |       |            | Weight        | Std. Mean Difference |                      |
|-----------------------|----------------------|-------|------------|---------------|-------|------------|---------------|----------------------|----------------------|
|                       | Mean                 | SD    | Total      | Mean          | SD    | Total      |               | IV, Random, 95% CI   | 95% CI               |
| Adams 2018            | 53.4                 | 7.2   | 35         | 53.7          | 6     | 27         | 15.2%         | -0.04                | [-0.55, 0.46]        |
| Cornie 2013           | 49.8                 | 7.8   | 22         | 48.1          | 10.5  | 19         | 11.2%         | 0.18                 | [-0.43, 0.80]        |
| Kampshoff 2015        | 82.5                 | 21.4  | 91         | 82            | 21.4  | 91         | 29.0%         | 0.02                 | [-0.27, 0.31]        |
| Mijwel 2017           | 71.59                | 27.25 | 74         | 54.84         | 33.03 | 60         | 24.2%         | 0.56                 | [0.21, 0.90]         |
| Persoon 2017          | 81                   | 23.8  | 50         | 73.4          | 31.8  | 47         | 20.5%         | 0.27                 | [-0.13, 0.67]        |
| <b>Total (95% CI)</b> |                      |       | <b>272</b> |               |       | <b>244</b> | <b>100.0%</b> | <b>0.21</b>          | <b>[-0.02, 0.44]</b> |

Heterogeneity: Tau<sup>2</sup> = 0.03; Chi<sup>2</sup> = 6.47, df = 4 (P = 0.17); I<sup>2</sup> = 38%  
 Test for overall effect: Z = 1.78 (P = 0.07)

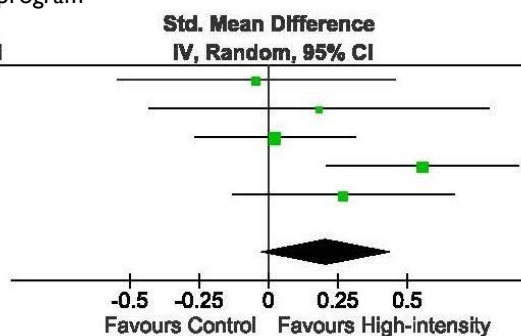



**Supplementary Figure S28:** Effects of the weekly exercise frequency in role functioning dimension.

Role functioning dimension: 2 times per week

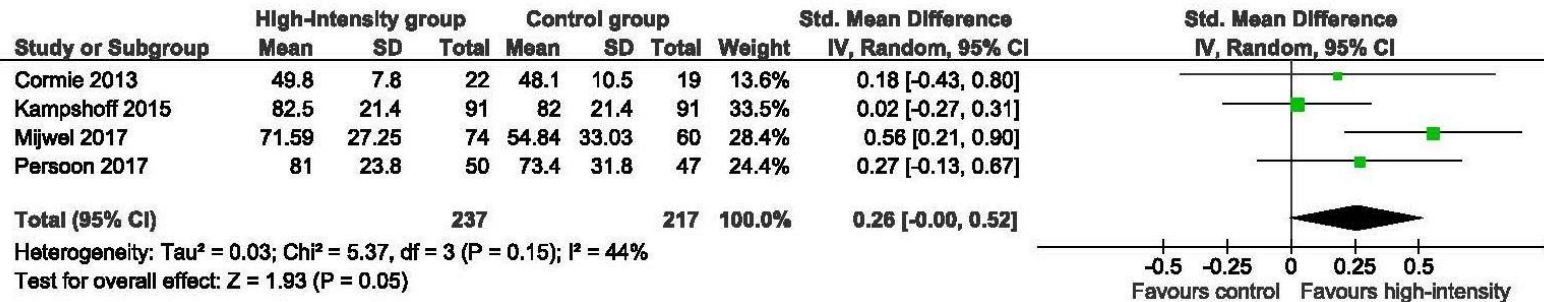

Role functioning dimension: 3 times per week

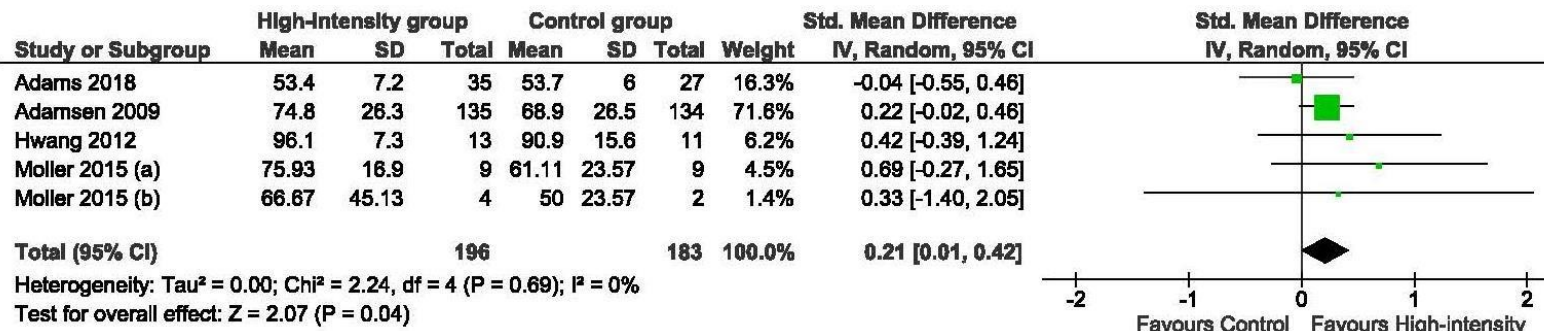

**Supplementary Figure S29:** Effects of training minutes per week in role functioning dimension.

Role functioning dimension: 15 minutes or less of high-intensity training

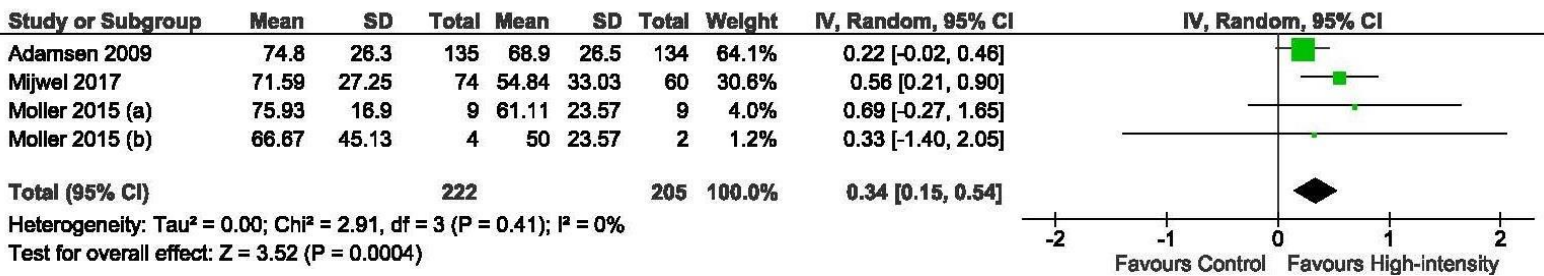

Role functioning dimension: More than 15 minutes of high-intensity training

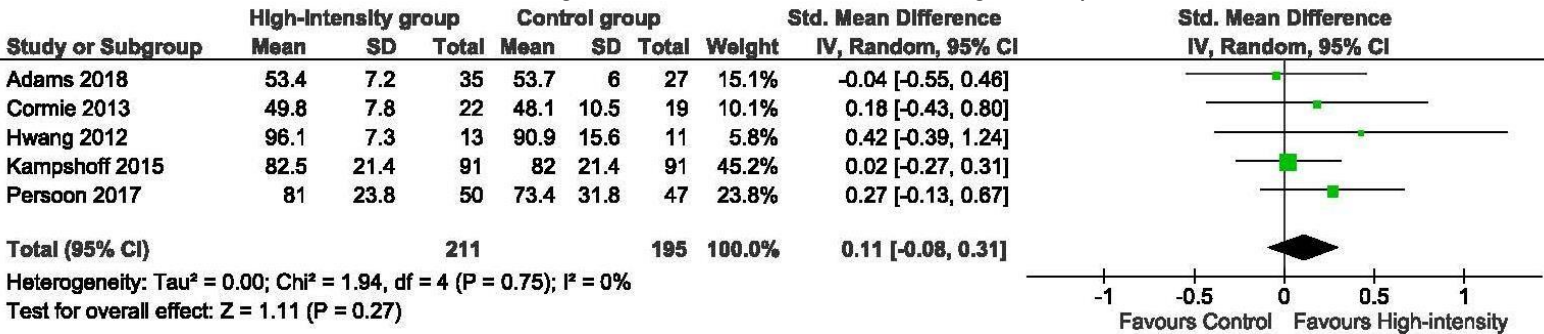

**Supplementary Figure S30:** Effects of high-intensity exercise in emotional functioning according to the treatment timing.

Emotional functioning dimension: Comparison between high-intensity group and control group.

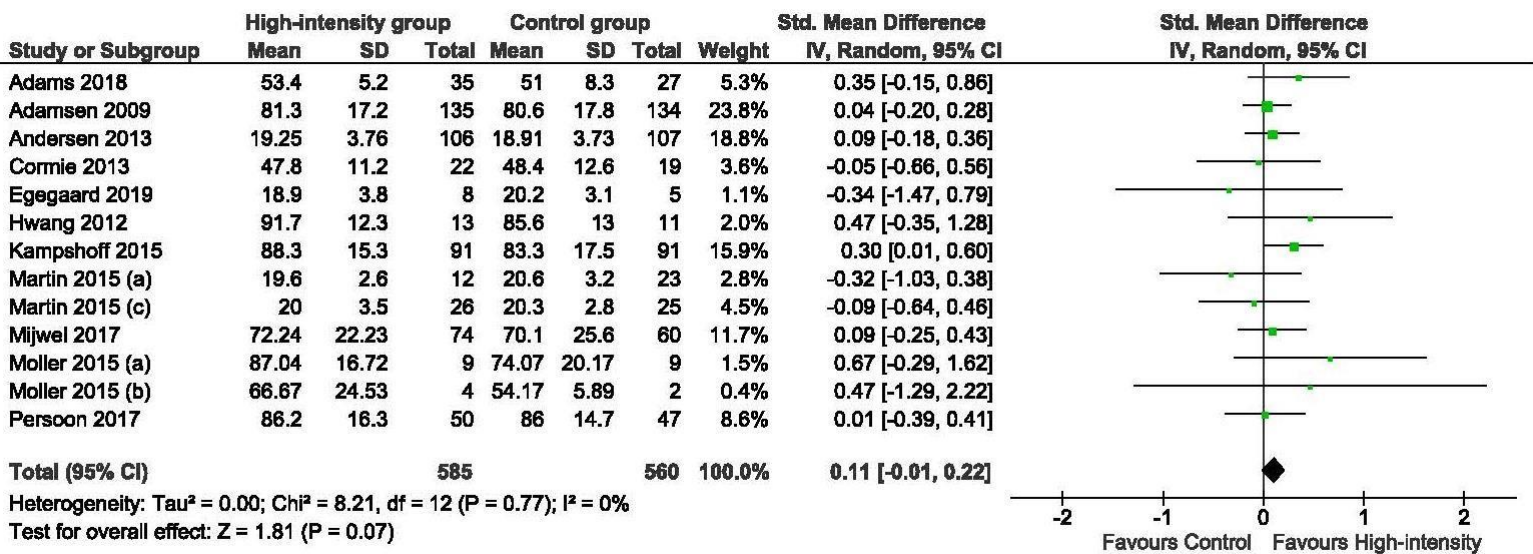

Emotional functioning dimension: Comparison between high-intensity group and low-moderate intensity group

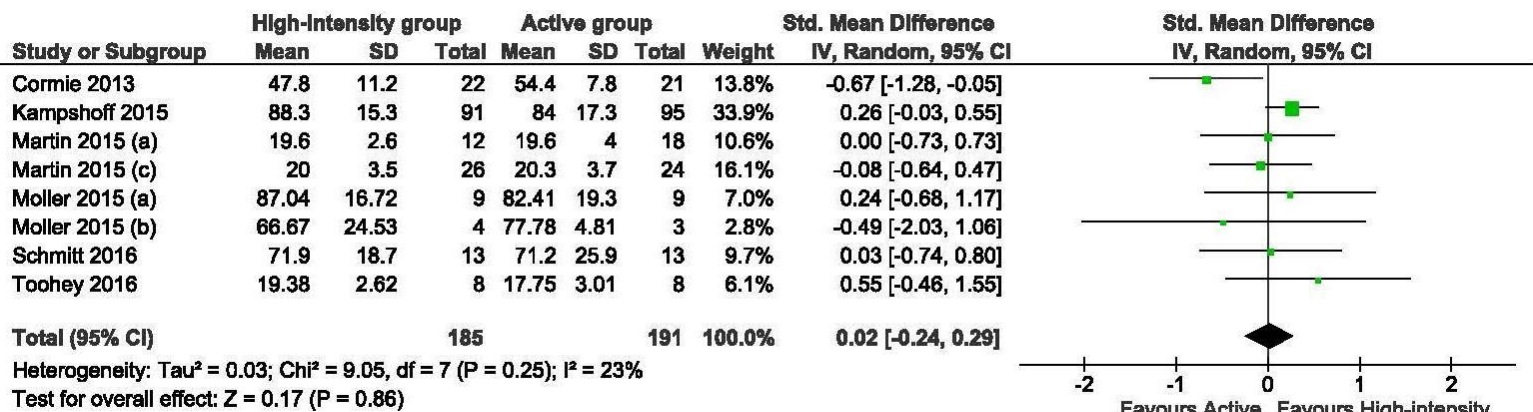

**Supplementary Figure S31:** Effects of high-intensity training in global health according to the treatment timing.

Emotional functioning dimension: During treatment

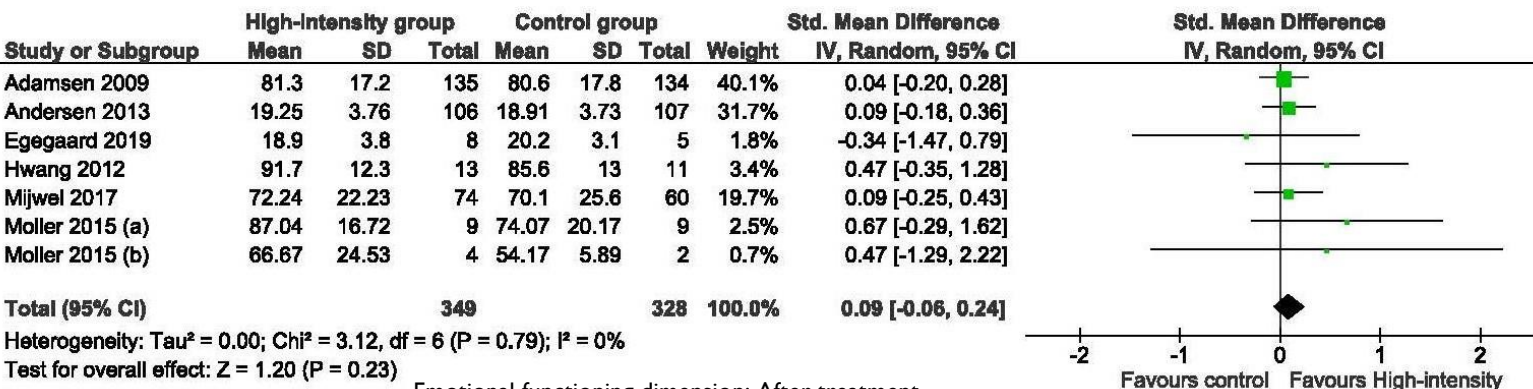

Emotional functioning dimension: After treatment

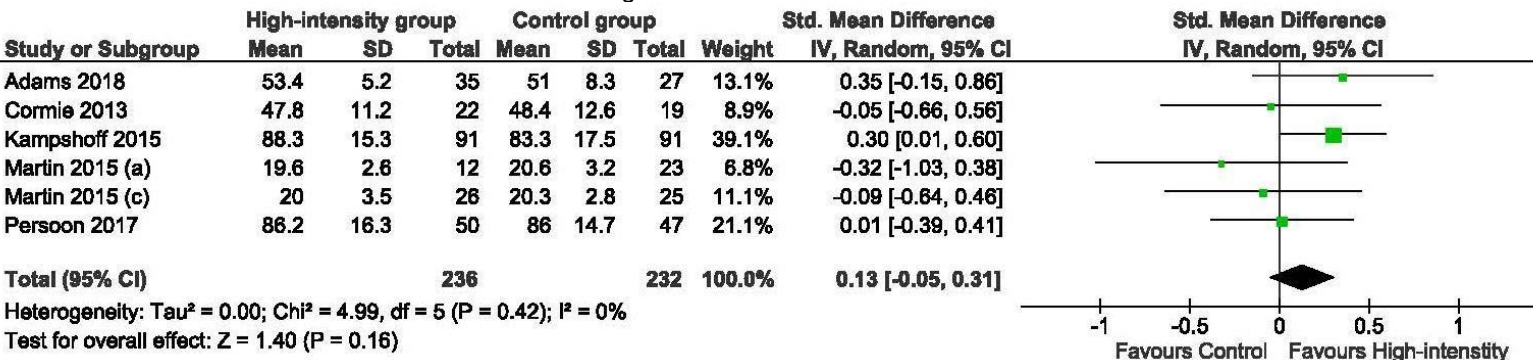



**Supplementary Figure S32:** Effects of the type pf exercise in global health dimension.

Emotional functioning dimension: High-intensity cardiovascular training

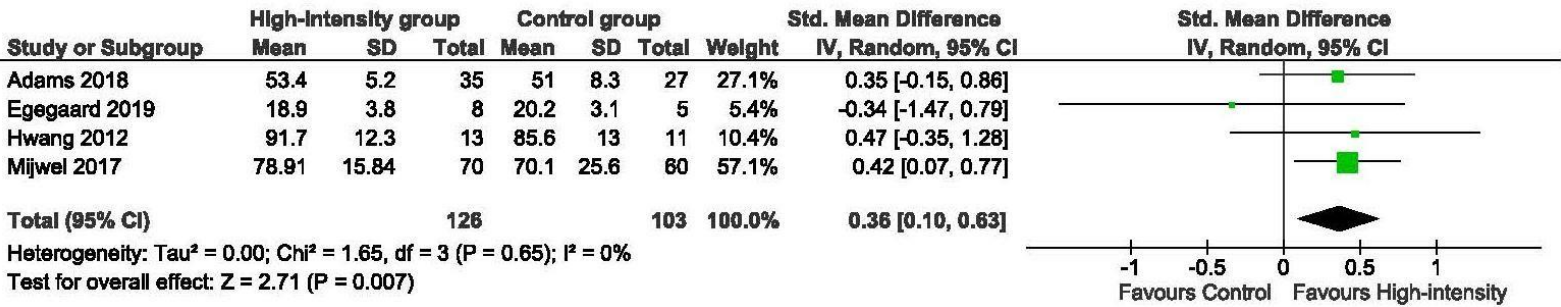

Emotional functioning dimension: High-intensity cardiovascular training + Resistance training

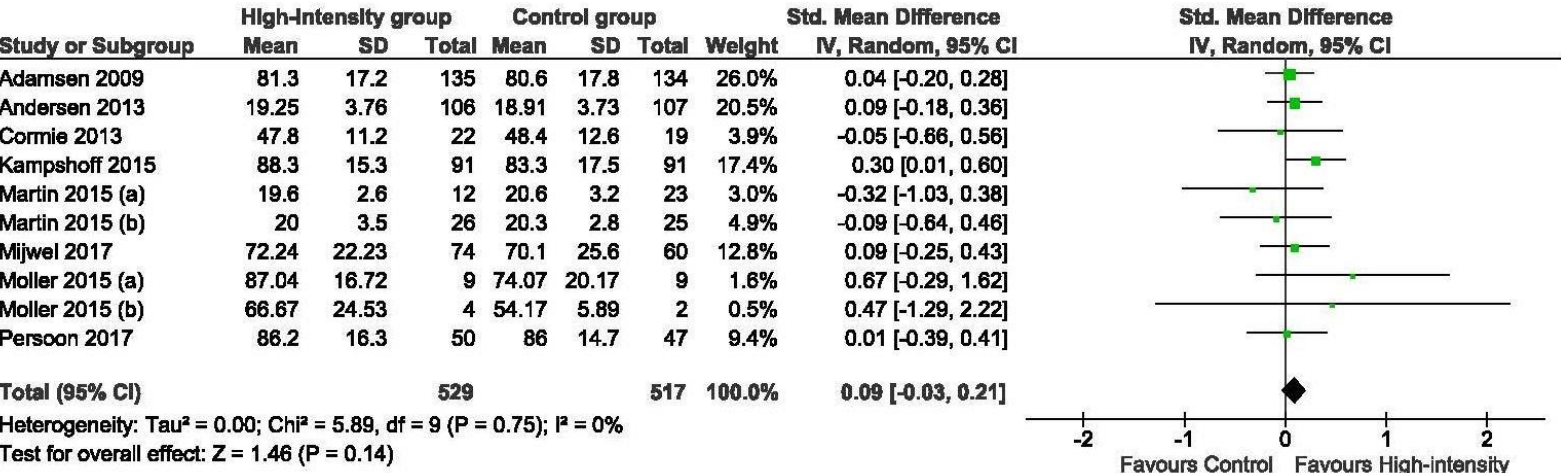

**Supplementary Figure S33** Effects of the exercise programs length in emotional functioning dimension.

Emotional functioning dimension: Eight weeks of exercise program or less

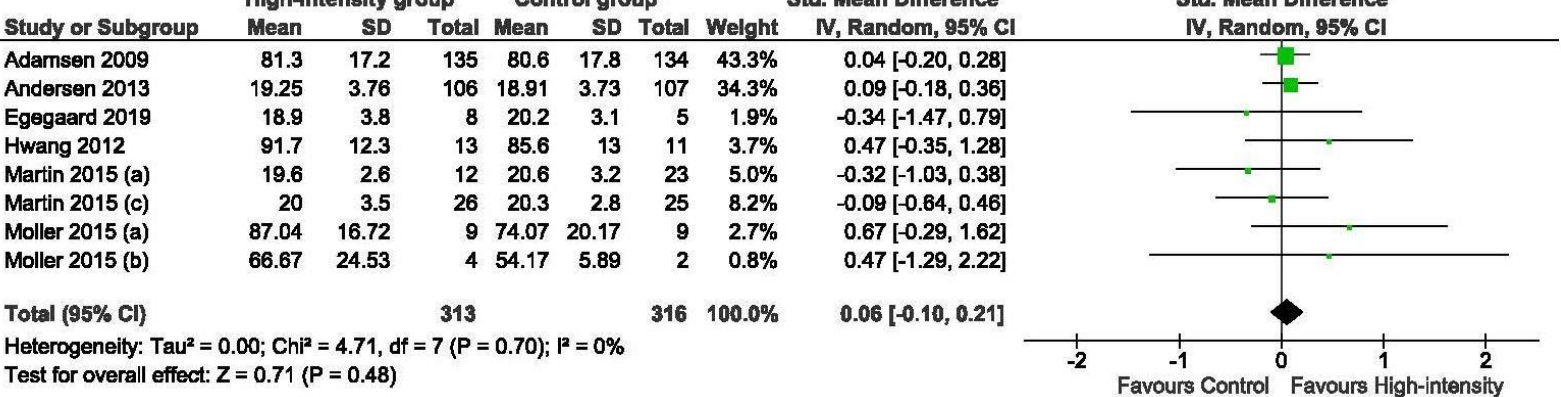

Emotional functioning dimension: More than eight weeks of exercise program

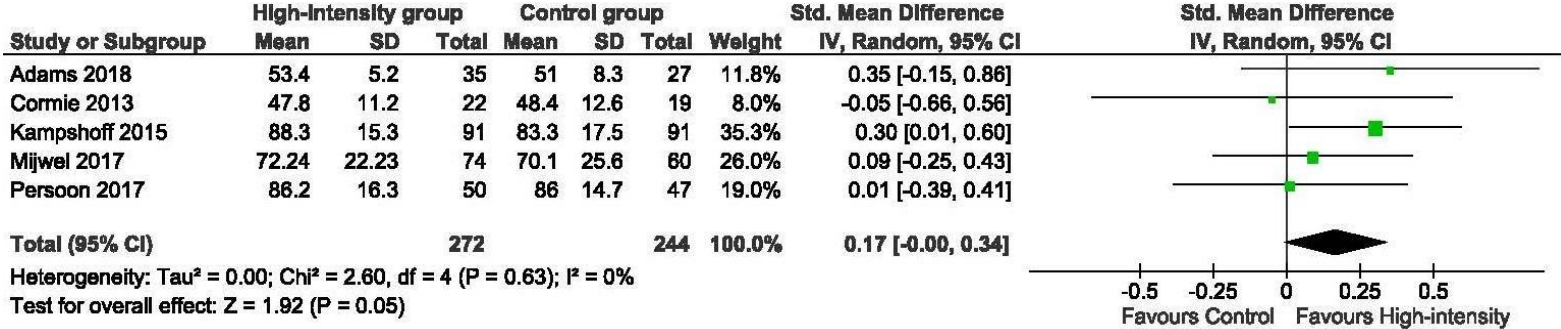

**Supplementary Figure S34:** Effects of the weekly exercise frequency in emotional functioning dimension.

Emotional functioning dimension: 2 times per week

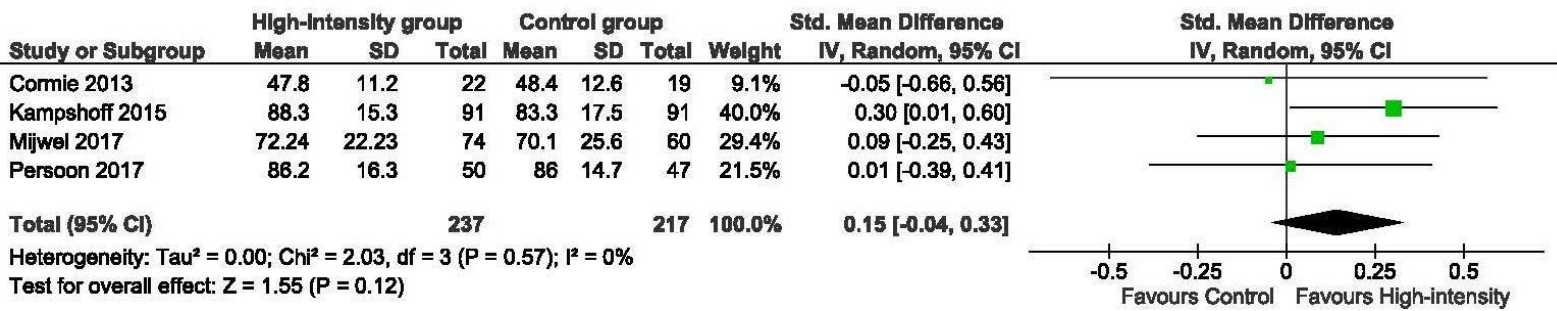

Emotional functioning dimension: 3 times per week

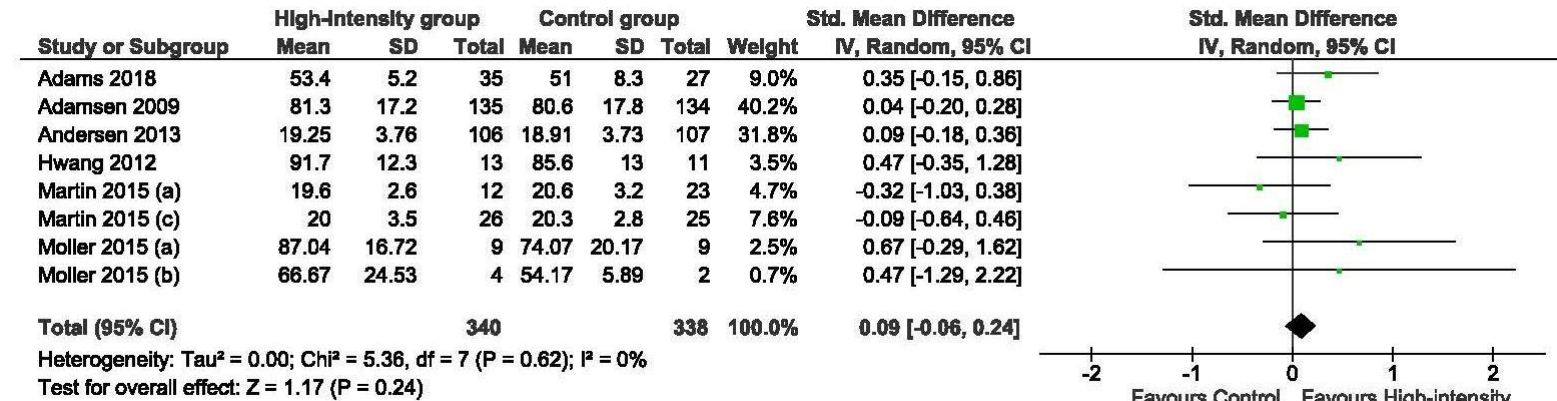

**Supplementary Figure S35:** Effects of training minutes per week in emotional functioning dimension.

Emotional functioning dimension: Less than 120 minutes of exercise per week

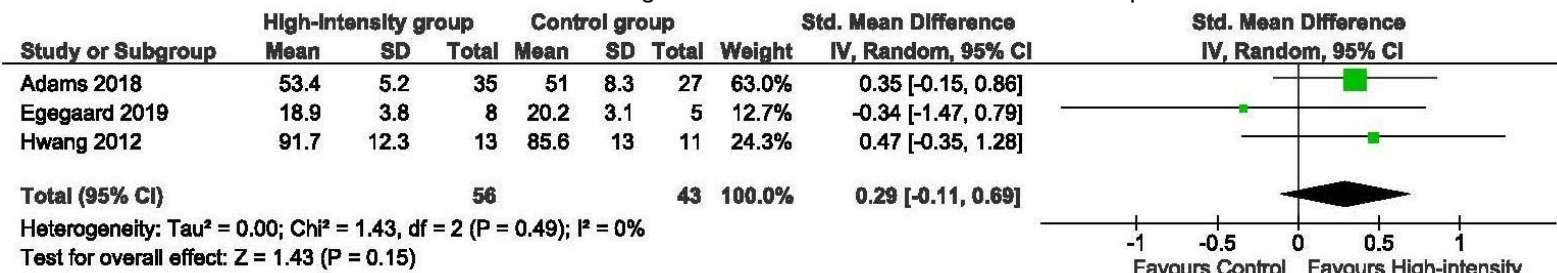

Emotional functioning dimension: 120 minutes or more or exercise per week

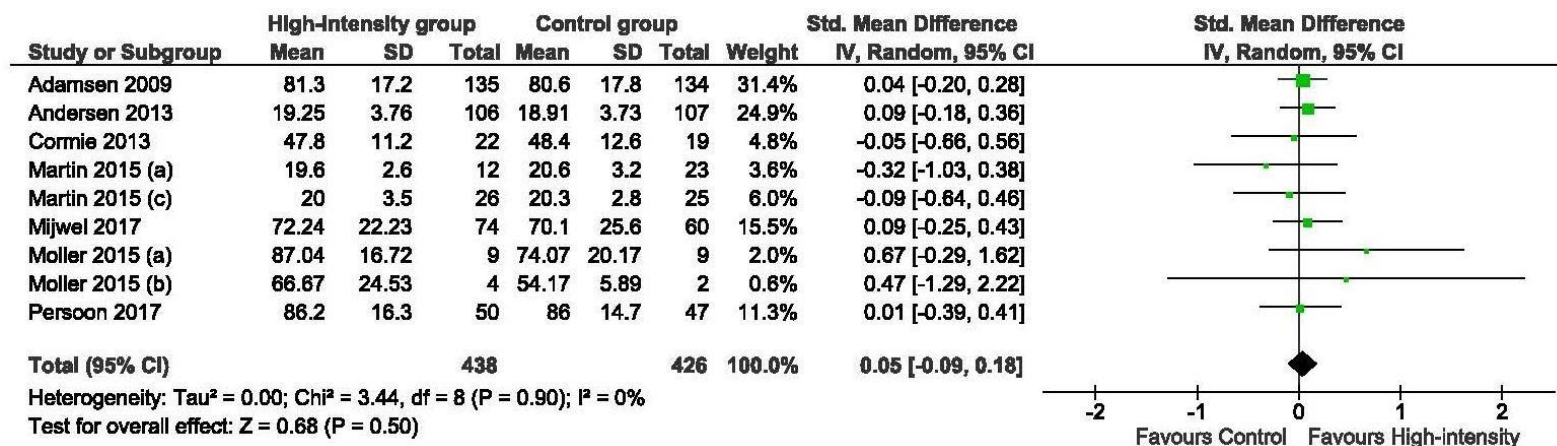



**Supplementary Figure S36:** Effects of the high-intensity training part duration in emotional functioning dimension.

Emotional functioning dimension: 15 minutes or less of high-intensity training

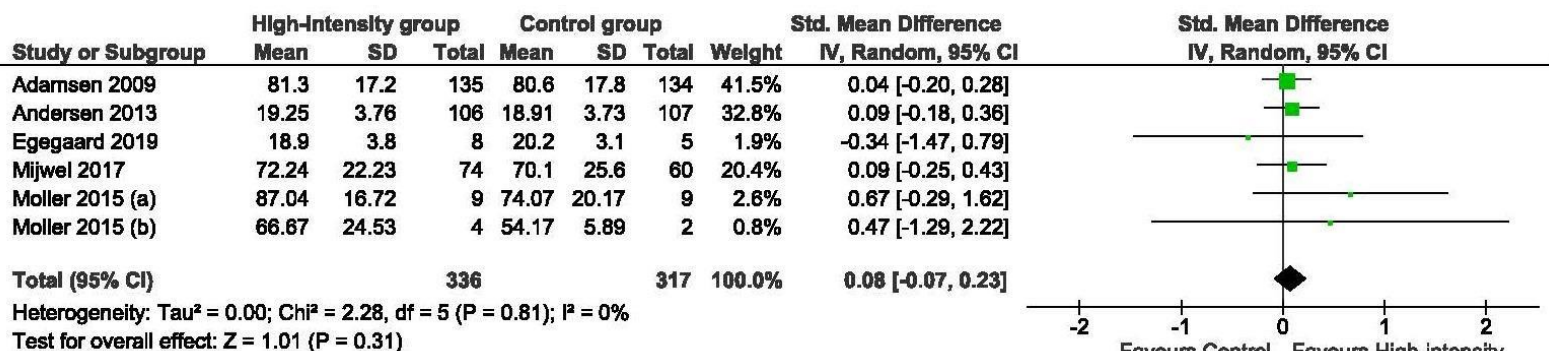

Emotional functioning dimension: More than 15 minutes of high-intensity training

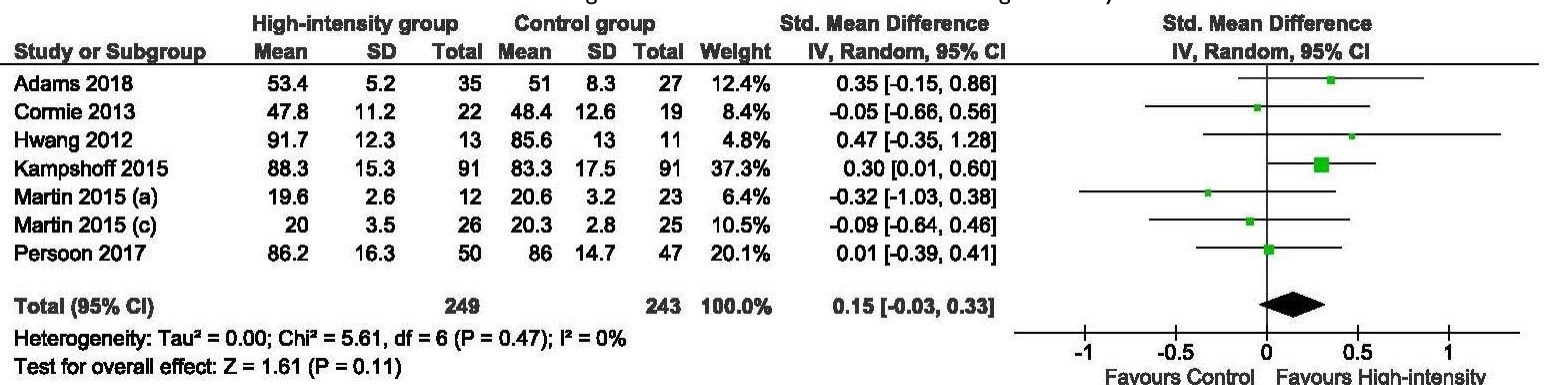

**Supplementary Figure S37:** Effects in the cognitive functioning dimension of the comparisons between high-intensity training group and control group, and high-intensity training group and low-intensity exercise group.

Cognitive functioning dimension: Comparison between high-intensity group and control group

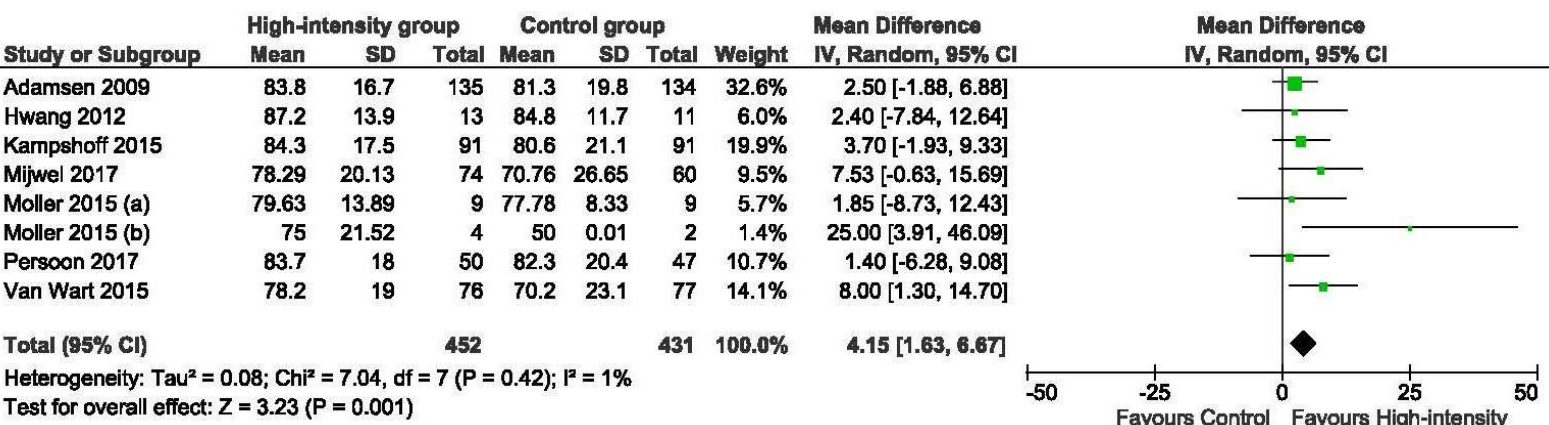

Cognitive functioning dimension: Comparison between high-intensity group and low-moderate intensity

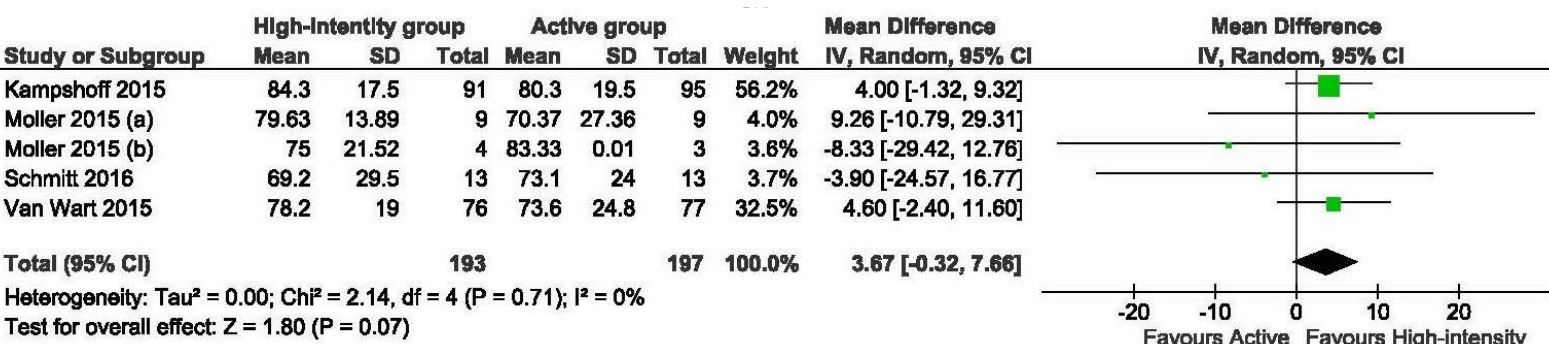

**Supplementary Figure S38:** Effects of the exercise programs length in global health dimension.

Cognitive functioning dimension: Eight weeks of exercise program or less

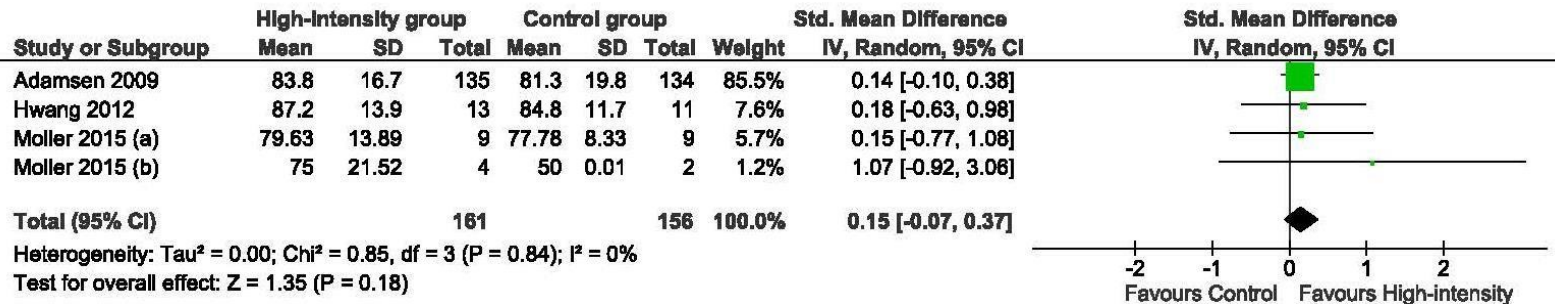

Cognitive functioning dimension: More than eight weeks of exercise program

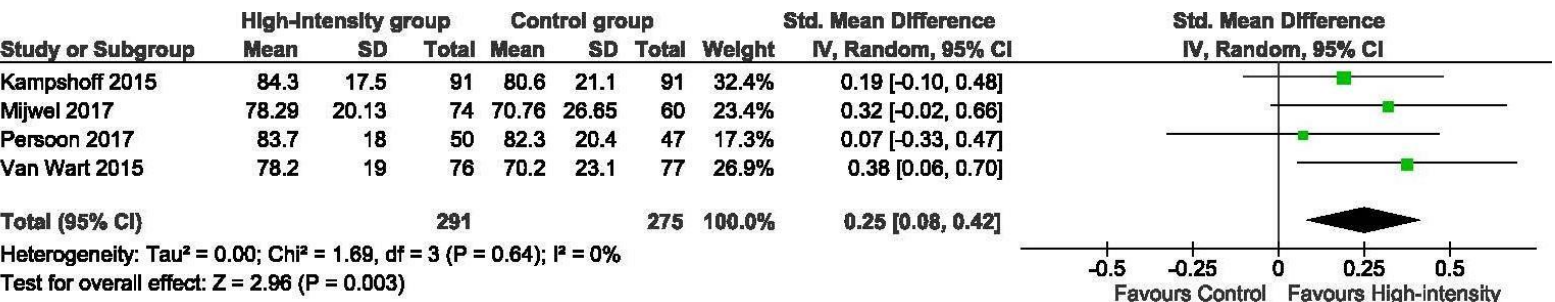

**Supplementary Figure S39:** Effects of the weekly exercise frequency in cognitive functioning dimension.

Cognitive functioning dimension: 2 times per week

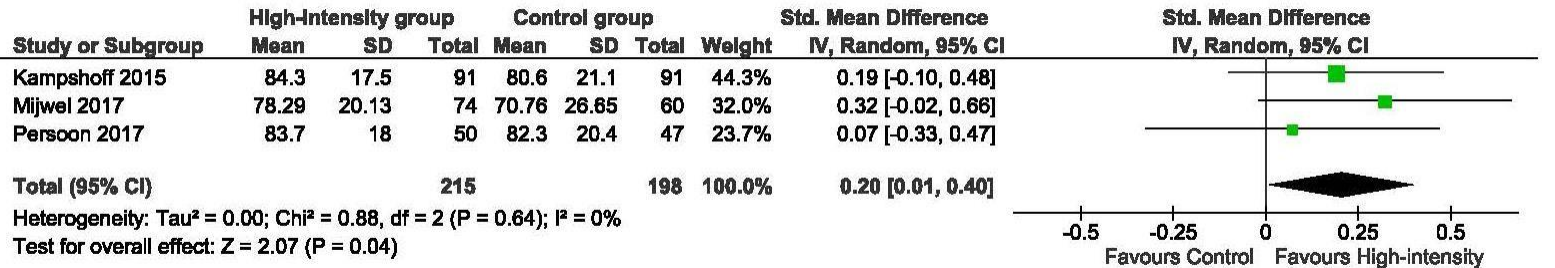

Cognitive functioning dimension: 3 times per week

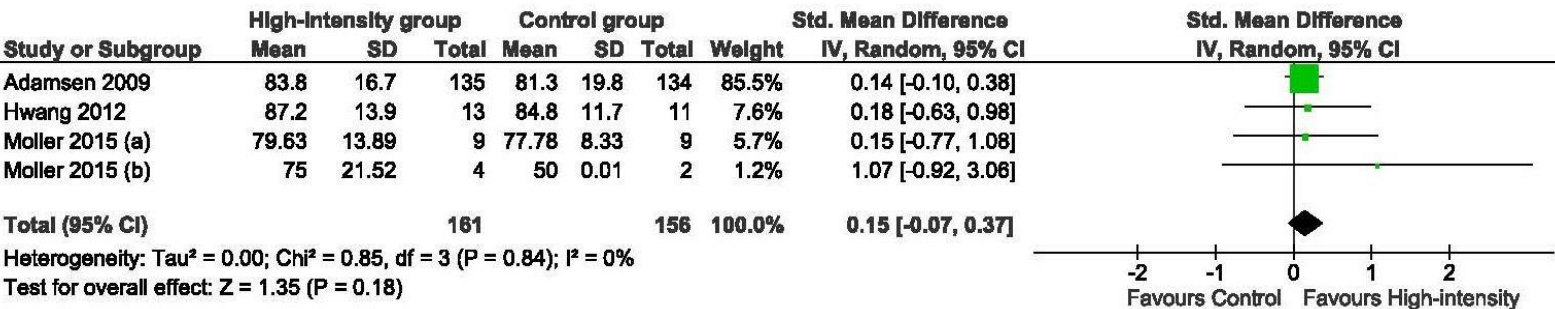



**Supplementary Figure S40:** Effects of the high-intensity training part duration in cognitive functioning dimension.

Cognitive functioning dimension: 15 minutes or less of high-intensity training

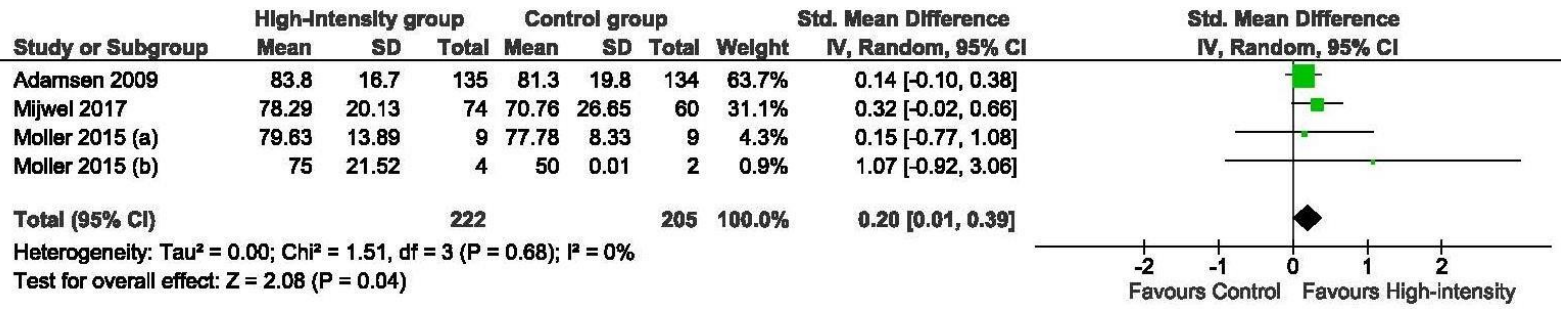

Cognitive functioning dimension: More than 15 minutes of high-intensity training

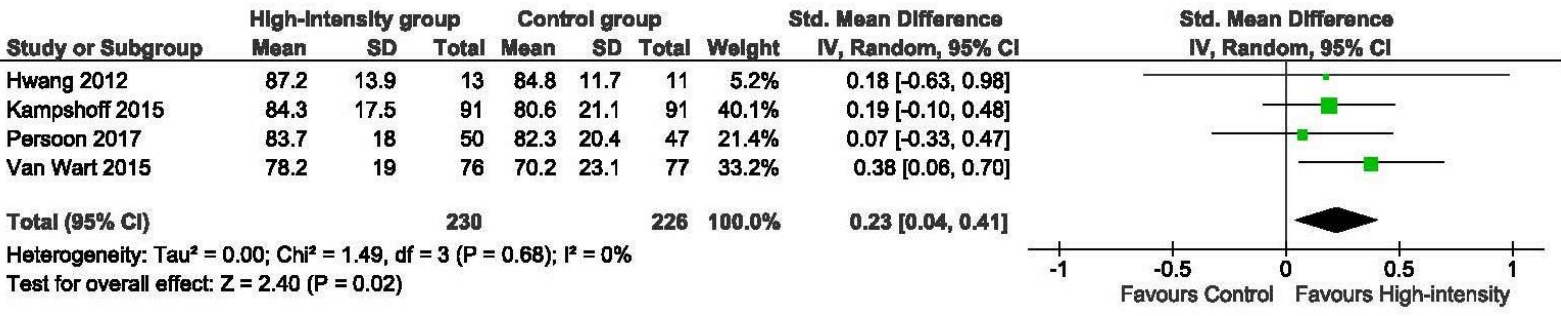

**Supplementary Figure S41:** Effects in social functioning dimension of the comparisons between high-intensity training group and control group, and high- intensity training group and low- intensity exercise group.

Social functioning dimension: Comparison between high-intensity group and control group

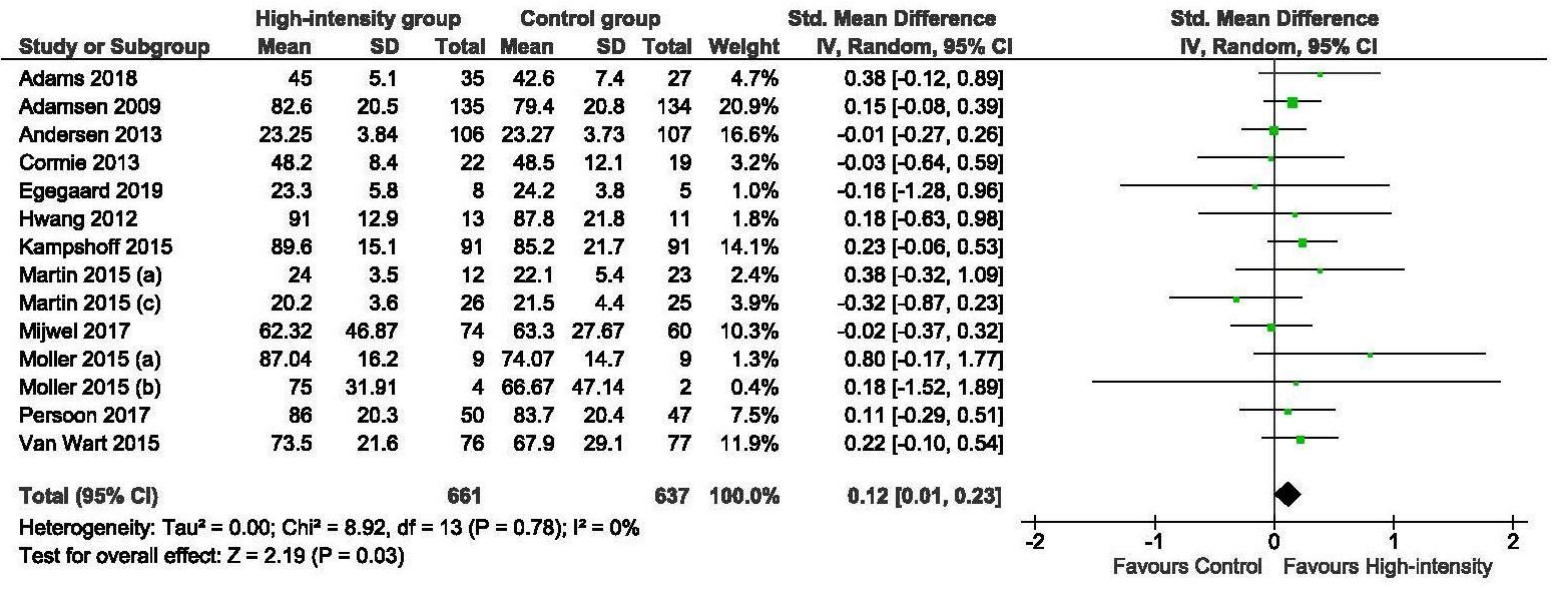

Social functioning dimension: Comparison between high-intensity group and low-moderate intensity group

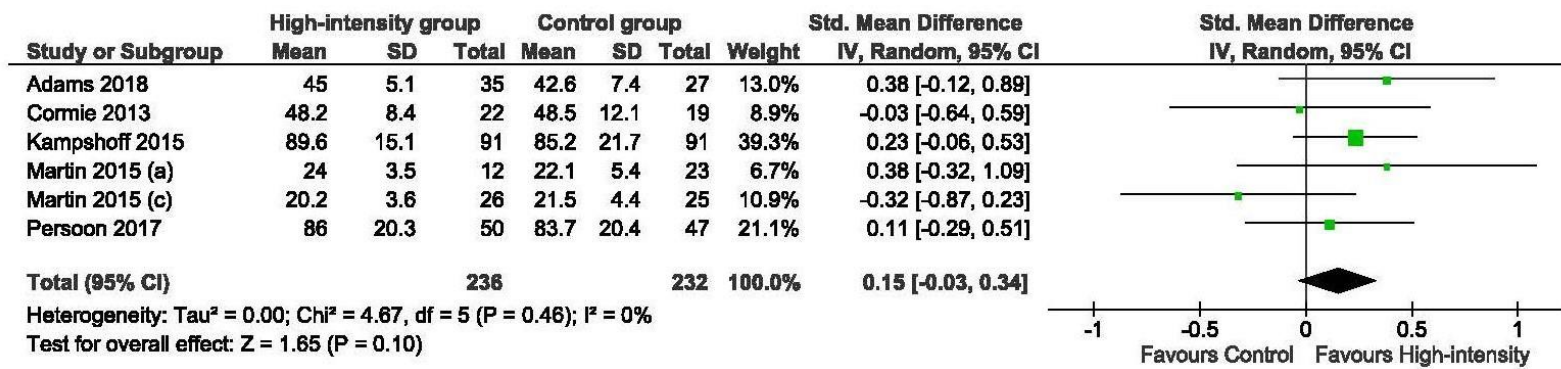

**Supplementary Figure S42:** Effects of high-intensity training in social functioning according to the treatment timing.

Social functioning dimension: During treatment

| Study or Subgroup     | High-Intensity group |       |            | Control group |       |            | Weight        | Std. Mean Difference<br>IV, Random, 95% CI |
|-----------------------|----------------------|-------|------------|---------------|-------|------------|---------------|--------------------------------------------|
|                       | Mean                 | SD    | Total      | Mean          | SD    | Total      |               |                                            |
| Adamsen 2009          | 45                   | 5.1   | 35         | 42.6          | 7.4   | 27         | 8.9%          | 0.38 [-0.12, 0.89]                         |
| Andersen 2013         | 82.6                 | 20.5  | 135        | 79.4          | 20.8  | 134        | 40.0%         | 0.15 [-0.08, 0.39]                         |
| Egegaard 2019         | 23.3                 | 5.8   | 8          | 24.2          | 3.8   | 5          | 1.8%          | -0.16 [-1.28, 0.96]                        |
| Hwang 2012            | 91                   | 12.9  | 13         | 87.8          | 21.8  | 11         | 3.5%          | 0.18 [-0.63, 0.98]                         |
| Mijwel 2017           | 62.32                | 46.87 | 74         | 63.3          | 27.67 | 60         | 19.8%         | -0.02 [-0.37, 0.32]                        |
| Moller 2015 (a)       | 87.04                | 16.2  | 9          | 74.07         | 14.7  | 9          | 2.4%          | 0.80 [-0.17, 1.77]                         |
| Moller 2015 (b)       | 75                   | 31.91 | 4          | 66.67         | 47.14 | 2          | 0.8%          | 0.18 [-1.52, 1.89]                         |
| Van Wart 2015         | 73.5                 | 21.6  | 76         | 67.9          | 29.1  | 77         | 22.7%         | 0.22 [-0.10, 0.54]                         |
| <b>Total (95% CI)</b> |                      |       | <b>354</b> |               |       | <b>325</b> | <b>100.0%</b> | <b>0.16 [0.01, 0.32]</b>                   |

Heterogeneity: Tau<sup>2</sup> = 0.00; Chi<sup>2</sup> = 3.98, df = 7 (P = 0.78); I<sup>2</sup> = 0%

Test for overall effect: Z = 2.13 (P = 0.03)

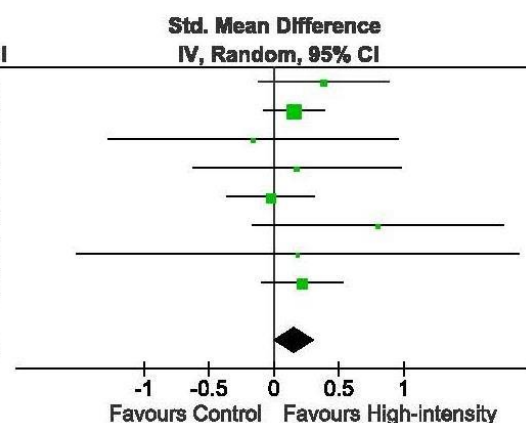

Social functioning dimension: After treatment

| Study or Subgroup     | High-intensity group |      |            | Control group |      |            | Weight        | Std. Mean Difference<br>IV, Random, 95% CI |
|-----------------------|----------------------|------|------------|---------------|------|------------|---------------|--------------------------------------------|
|                       | Mean                 | SD   | Total      | Mean          | SD   | Total      |               |                                            |
| Adams 2018            | 45                   | 5.1  | 35         | 42.6          | 7.4  | 27         | 13.0%         | 0.38 [-0.12, 0.89]                         |
| Comie 2013            | 48.2                 | 8.4  | 22         | 48.5          | 12.1 | 19         | 8.9%          | -0.03 [-0.64, 0.59]                        |
| Kampshoff 2015        | 89.6                 | 15.1 | 91         | 85.2          | 21.7 | 91         | 39.3%         | 0.23 [-0.06, 0.53]                         |
| Martin 2015 (a)       | 24                   | 3.5  | 12         | 22.1          | 5.4  | 23         | 6.7%          | 0.38 [-0.32, 1.09]                         |
| Martin 2015 (c)       | 20.2                 | 3.6  | 26         | 21.5          | 4.4  | 25         | 10.9%         | -0.32 [-0.87, 0.23]                        |
| Persoon 2017          | 86                   | 20.3 | 50         | 83.7          | 20.4 | 47         | 21.1%         | 0.11 [-0.29, 0.51]                         |
| <b>Total (95% CI)</b> |                      |      | <b>236</b> |               |      | <b>232</b> | <b>100.0%</b> | <b>0.15 [-0.03, 0.34]</b>                  |

Heterogeneity: Tau<sup>2</sup> = 0.00; Chi<sup>2</sup> = 4.67, df = 5 (P = 0.46); I<sup>2</sup> = 0%

Test for overall effect: Z = 1.65 (P = 0.10)

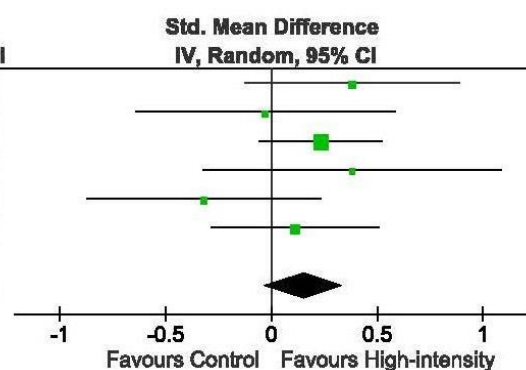

**Supplementary Figure S43:** Effects of the type of exercise in social functioning dimension.

Social functioning dimension: High-intensity cardiovascular training

| Study or Subgroup     | High-Intensity group |       |            | Control group |       |            | Weight        | Std. Mean Difference<br>IV, Random, 95% CI |
|-----------------------|----------------------|-------|------------|---------------|-------|------------|---------------|--------------------------------------------|
|                       | Mean                 | SD    | Total      | Mean          | SD    | Total      |               |                                            |
| Adams 2018            | 45                   | 5.1   | 35         | 42.6          | 7.4   | 27         | 26.8%         | 0.38 [-0.12, 0.89]                         |
| Egegaard 2019         | 23.3                 | 5.8   | 8          | 24.2          | 3.8   | 5          | 5.5%          | -0.16 [-1.28, 0.96]                        |
| Hwang 2012            | 91                   | 12.9  | 13         | 87.8          | 21.8  | 11         | 10.6%         | 0.18 [-0.63, 0.98]                         |
| Mijwel 2017           | 71.33                | 23.94 | 70         | 63.3          | 27.67 | 60         | 57.1%         | 0.31 [-0.04, 0.66]                         |
| <b>Total (95% CI)</b> |                      |       | <b>126</b> |               |       | <b>103</b> | <b>100.0%</b> | <b>0.29 [0.03, 0.55]</b>                   |

Heterogeneity: Tau<sup>2</sup> = 0.00; Chi<sup>2</sup> = 0.84, df = 3 (P = 0.84); I<sup>2</sup> = 0%

Test for overall effect: Z = 2.16 (P = 0.03)

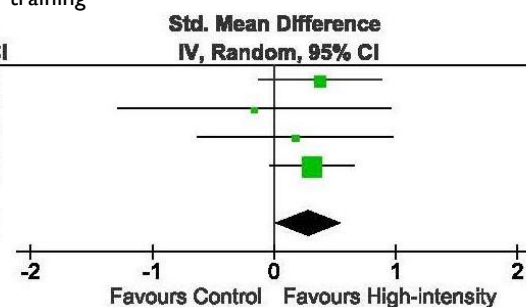

Social functioning dimension: High-intensity cardiovascular training + Resistance training

| Study or Subgroup     | High-Intensity group |       |            | Control group |       |            | Weight        | Std. Mean Difference<br>IV, Random, 95% CI |
|-----------------------|----------------------|-------|------------|---------------|-------|------------|---------------|--------------------------------------------|
|                       | Mean                 | SD    | Total      | Mean          | SD    | Total      |               |                                            |
| Adamsen 2009          | 82.6                 | 20.5  | 135        | 79.4          | 20.8  | 134        | 22.6%         | 0.15 [-0.08, 0.39]                         |
| Andersen 2013         | 23.25                | 3.84  | 106        | 23.27         | 3.73  | 107        | 17.9%         | -0.01 [-0.27, 0.26]                        |
| Comie 2013            | 48.2                 | 8.4   | 22         | 48.5          | 12.1  | 19         | 3.4%          | -0.03 [-0.64, 0.59]                        |
| Kampshoff 2015        | 89.6                 | 15.1  | 91         | 85.2          | 21.7  | 91         | 15.2%         | 0.23 [-0.06, 0.53]                         |
| Martin 2015 (a)       | 24                   | 3.5   | 12         | 22.1          | 5.4   | 23         | 2.6%          | 0.38 [-0.32, 1.09]                         |
| Martin 2015 (c)       | 20.2                 | 3.6   | 26         | 21.5          | 4.4   | 25         | 4.2%          | -0.32 [-0.87, 0.23]                        |
| Mijwel 2017           | 62.32                | 46.87 | 74         | 63.3          | 27.67 | 60         | 11.2%         | -0.02 [-0.37, 0.32]                        |
| Moller 2015 (a)       | 87.04                | 16.2  | 9          | 74.07         | 14.7  | 9          | 1.4%          | 0.80 [-0.17, 1.77]                         |
| Moller 2015 (b)       | 75                   | 31.91 | 4          | 66.67         | 47.14 | 2          | 0.4%          | 0.18 [-1.52, 1.89]                         |
| Persoon 2017          | 86                   | 20.3  | 50         | 83.7          | 20.4  | 47         | 8.2%          | 0.11 [-0.29, 0.51]                         |
| Van Wart 2015         | 73.5                 | 21.6  | 76         | 67.9          | 29.1  | 77         | 12.8%         | 0.22 [-0.10, 0.54]                         |
| <b>Total (95% CI)</b> |                      |       | <b>605</b> |               |       | <b>594</b> | <b>100.0%</b> | <b>0.11 [-0.00, 0.22]</b>                  |

Heterogeneity: Tau<sup>2</sup> = 0.00; Chi<sup>2</sup> = 7.61, df = 10 (P = 0.67); I<sup>2</sup> = 0%

Test for overall effect: Z = 1.91 (P = 0.06)

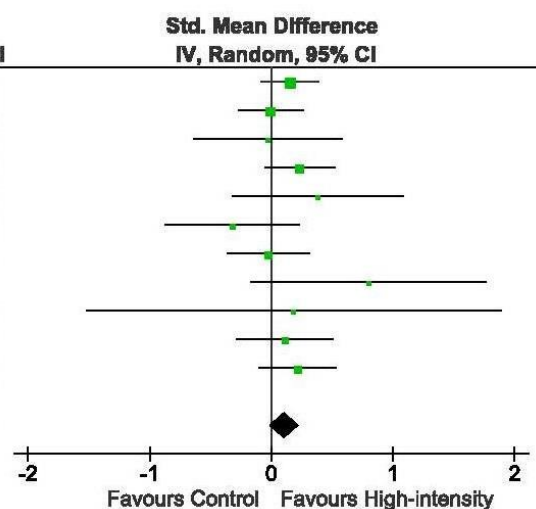



**Supplementary Figure S44:** Effects of the exercise programs length in social functioning dimension.

Social functioning dimension: Eight weeks of exercise program or less

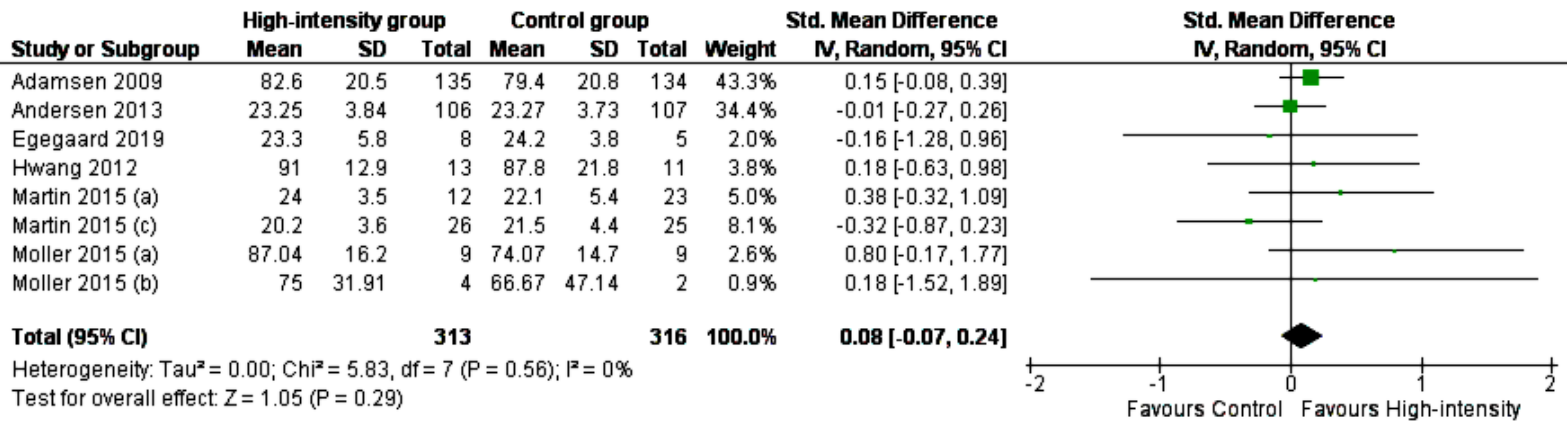

Social functioning dimension: More than eight weeks of exercise program

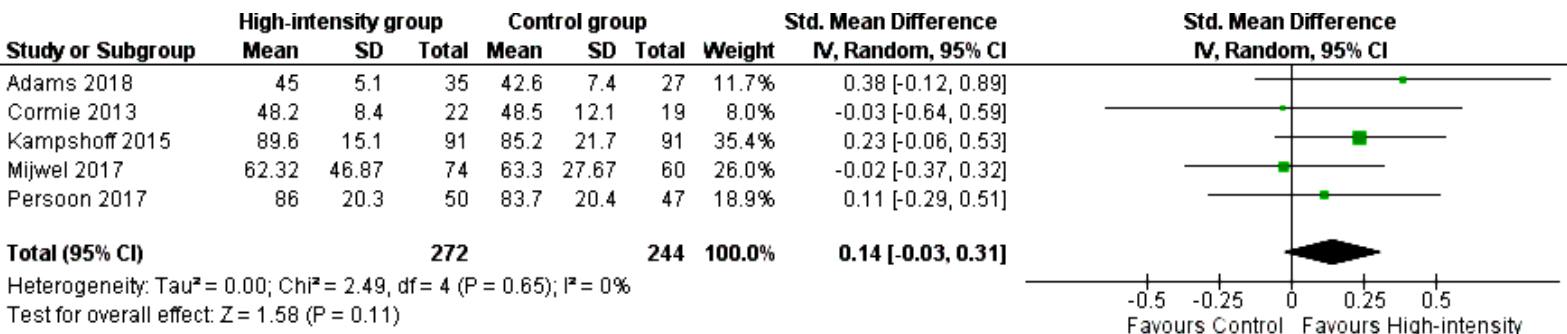

**Supplementary Figure S45:** Effects of the weekly exercise frequency in social functioning dimension

Social functioning dimension: 2 times per week

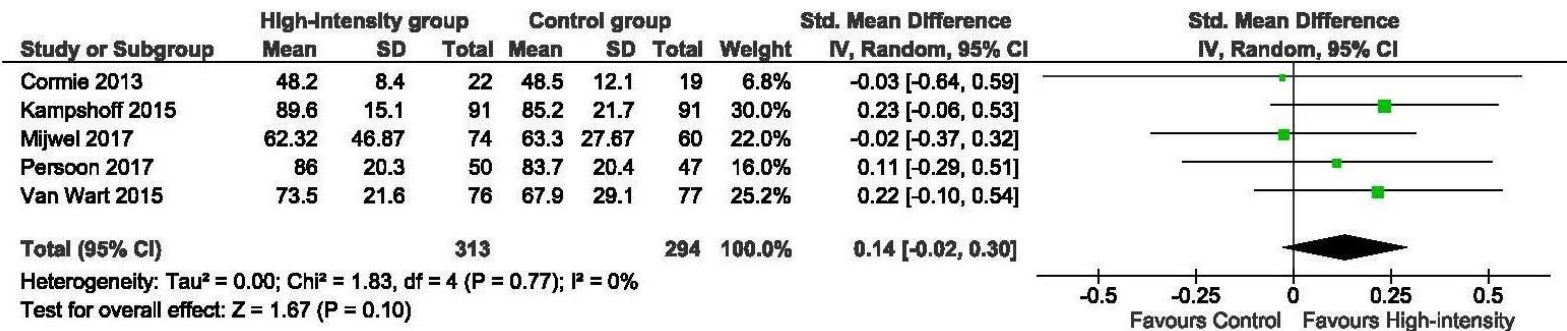

Social functioning dimension: 3 times per week

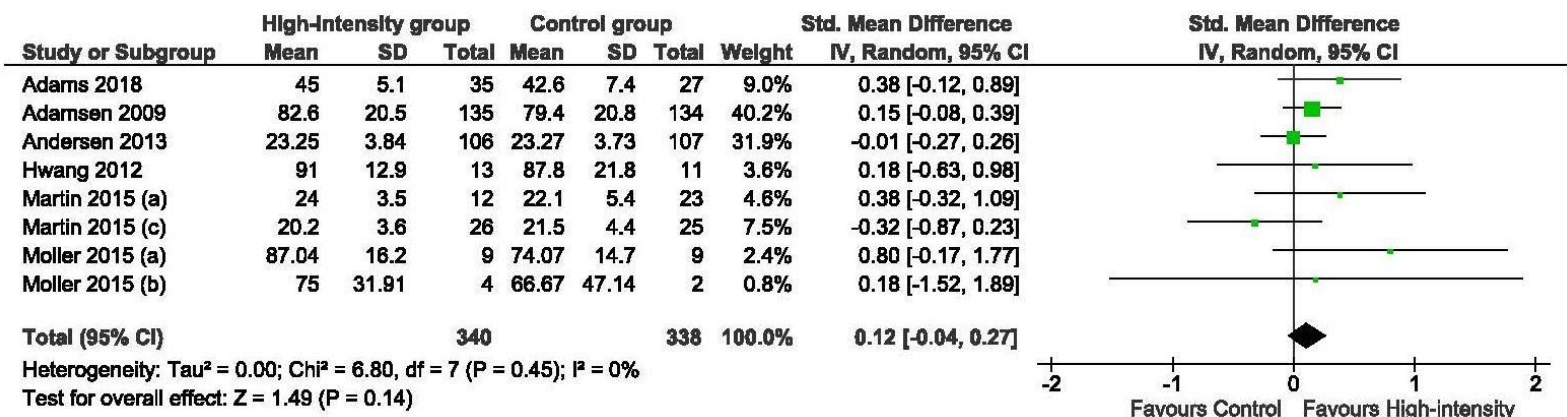

**Supplementary Figure S46:** Effects of training minutes per week in social functioning dimension.

Social functioning dimension: Less than 120 minutes of exercise per weeks

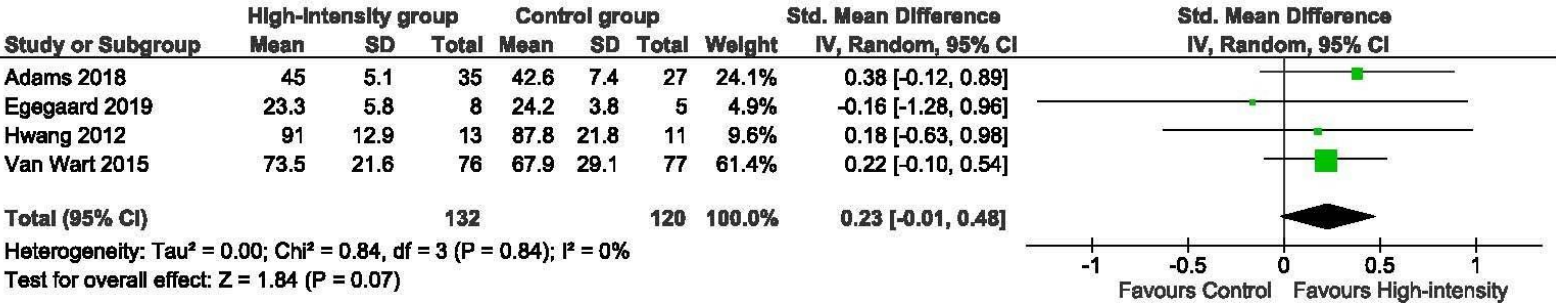

Social functioning dimension: 120 minutes or more of exercise per weeks

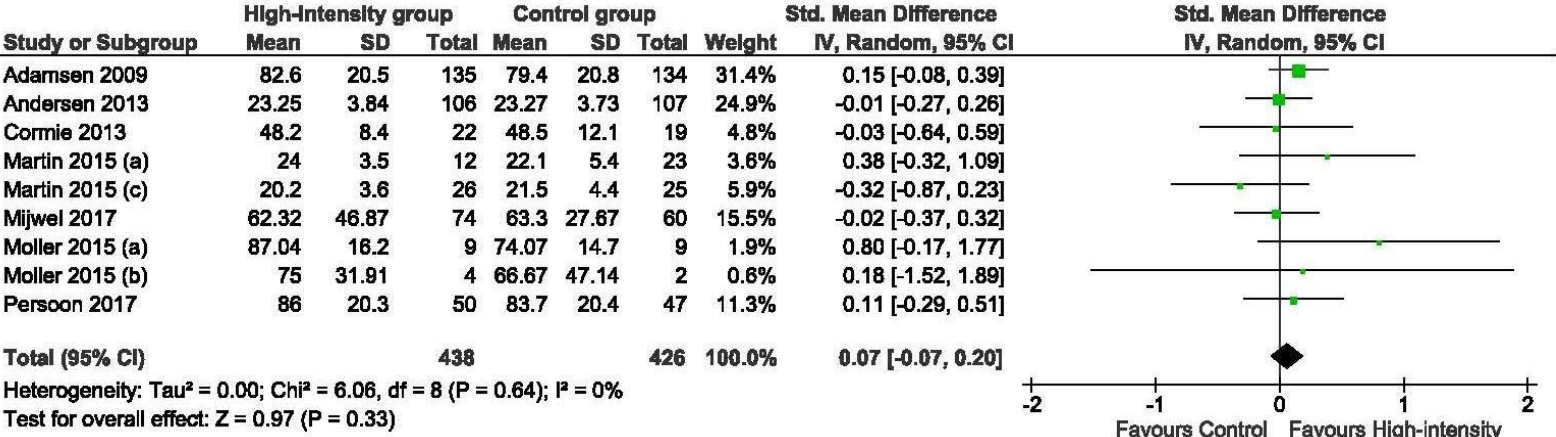

**Supplementary Figure S47** Effects of the high-intensity training part duration in social functioning dimension.

Social functioning dimension: 15 minutes or less of high-intensity training

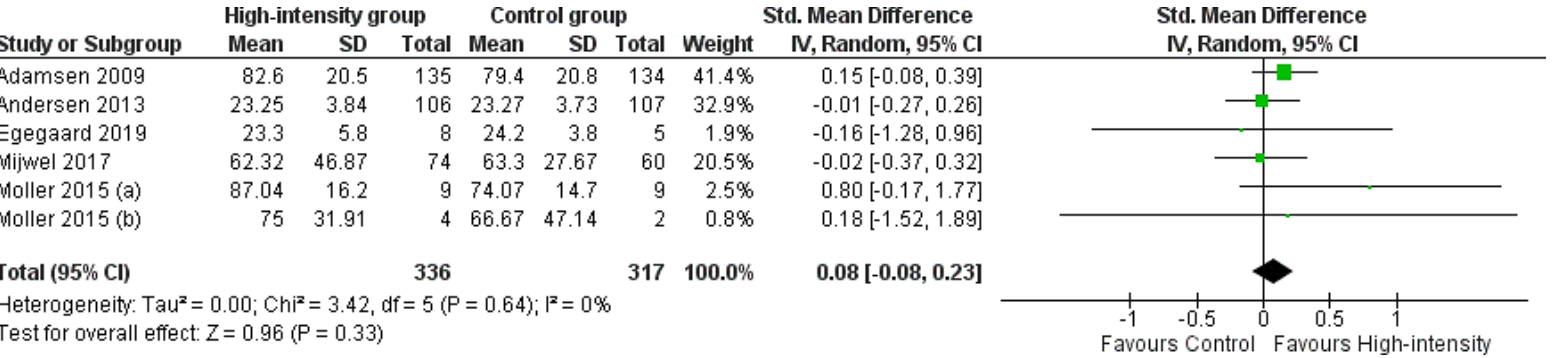

Social functioning dimension: More than 15 minutes of high-intensity training

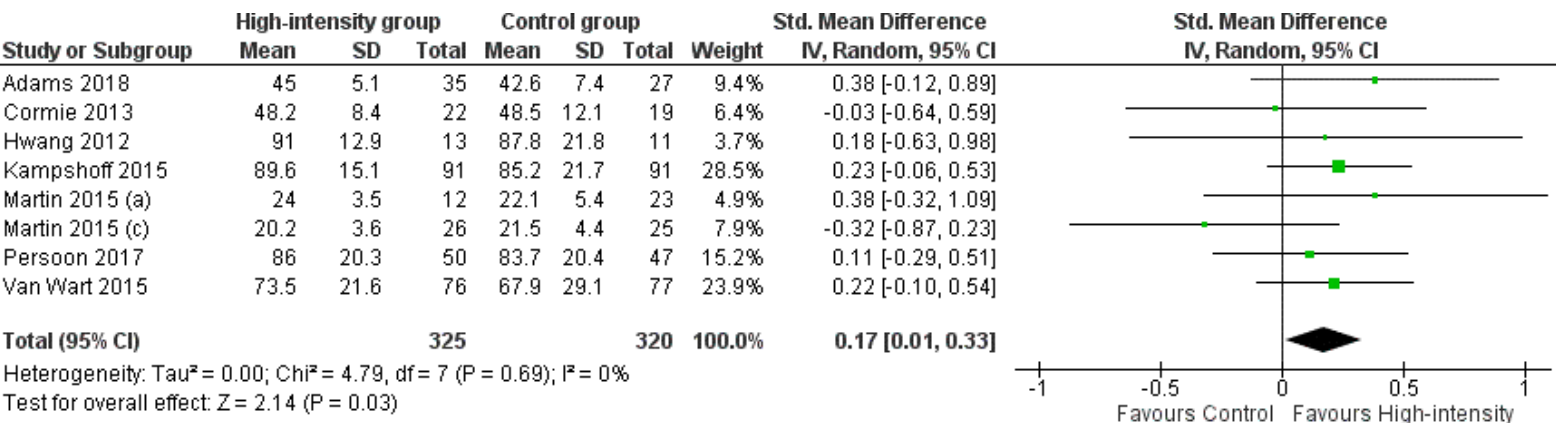

**Supplementary Figure S48:** Effects in the fatigue dimension of the comparisons between high-intensity training group and control group, and high- intensity training group and low- intensity exercise group.

Fatigue dimension: Comparison between high-intensity group and control group

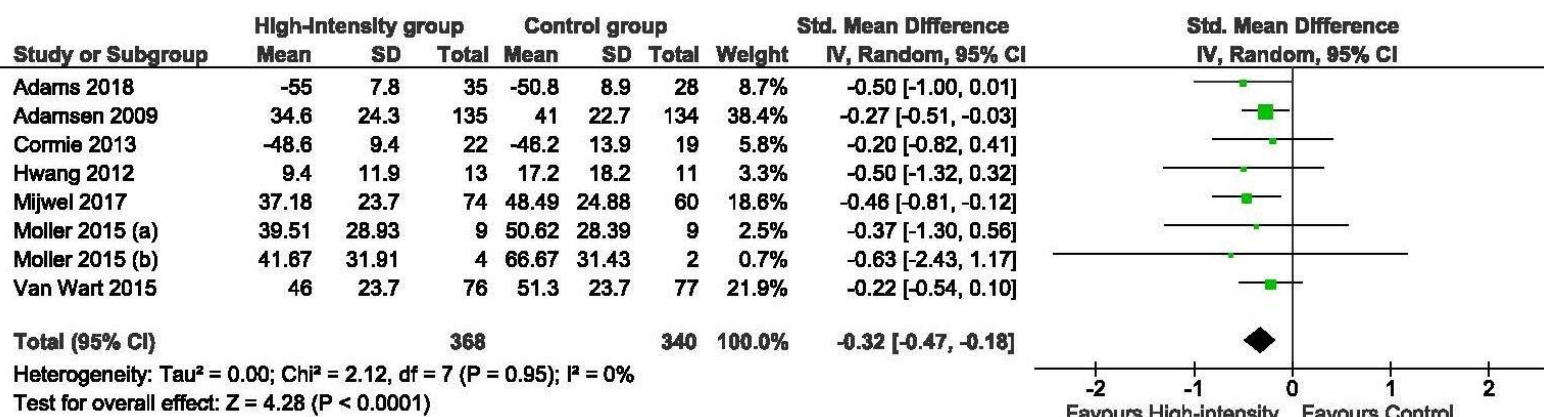

Fatigue dimension: Comparison between high-intensity group and low-moderate intensity group

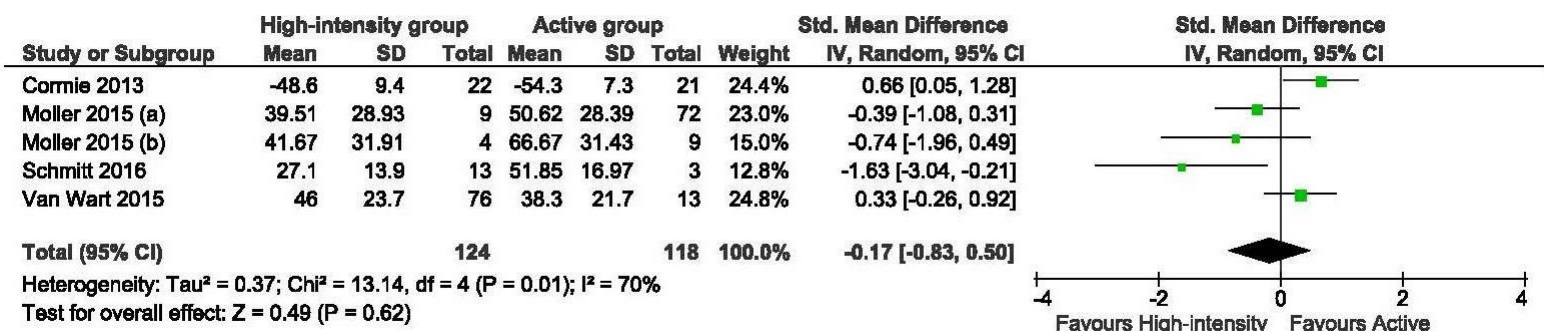

**Supplementary Figure S49:** Effects of high-intensity training in fatigue according to the treatment timing.

Fatigue functioning dimension: During treatment

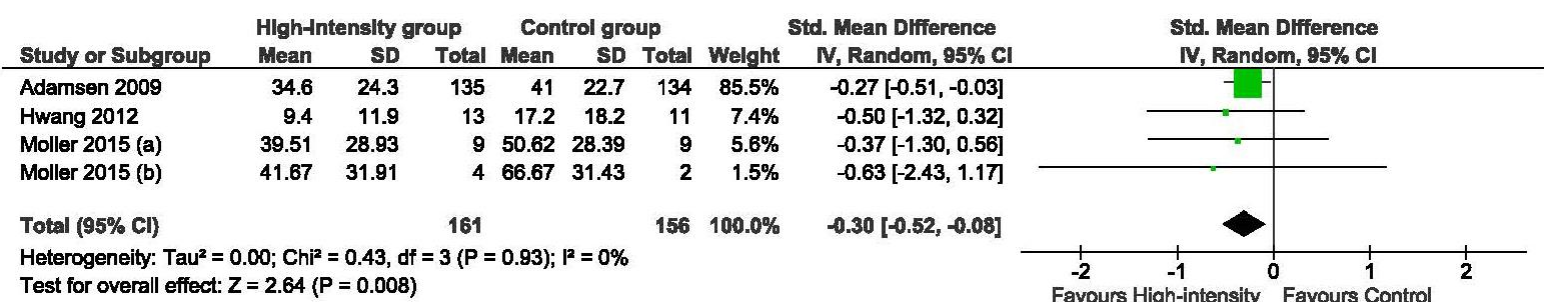

Fatigue functioning dimension: After treatment

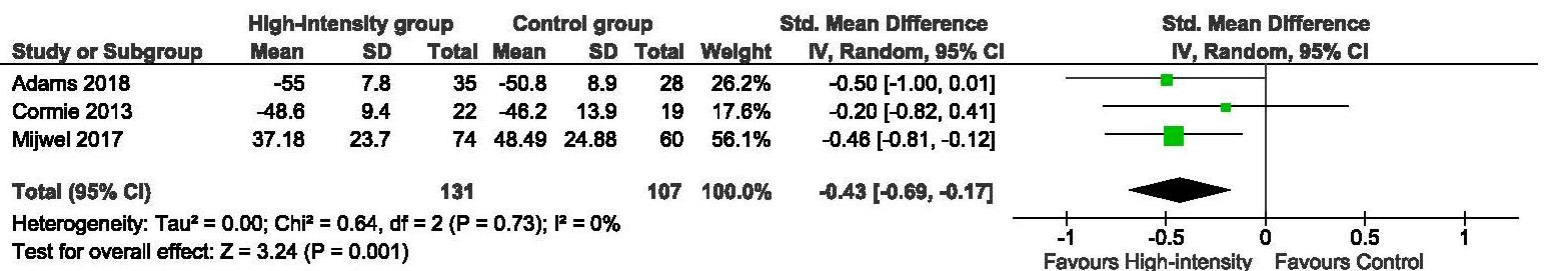



**Supplementary Figure S50:** Effects of the weekly exercise frequency in fatigue dimension.

Fatigue functioning dimension: 2 times per week

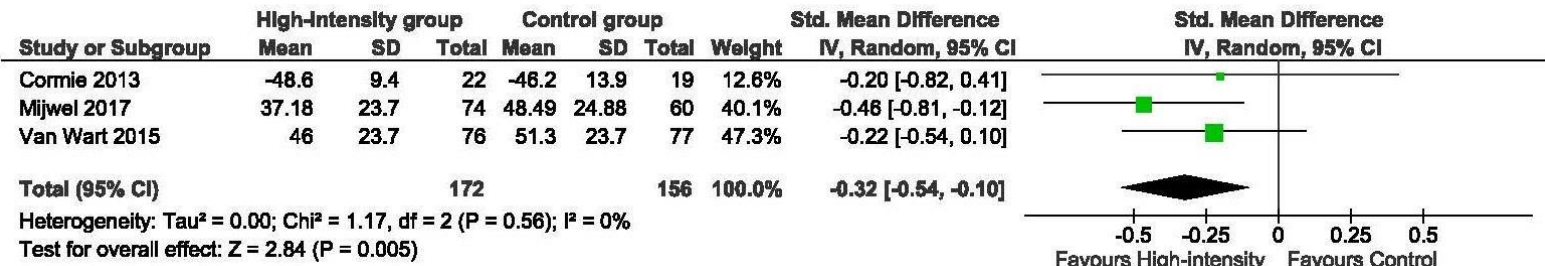

Fatigue functioning dimension: 3 times per week

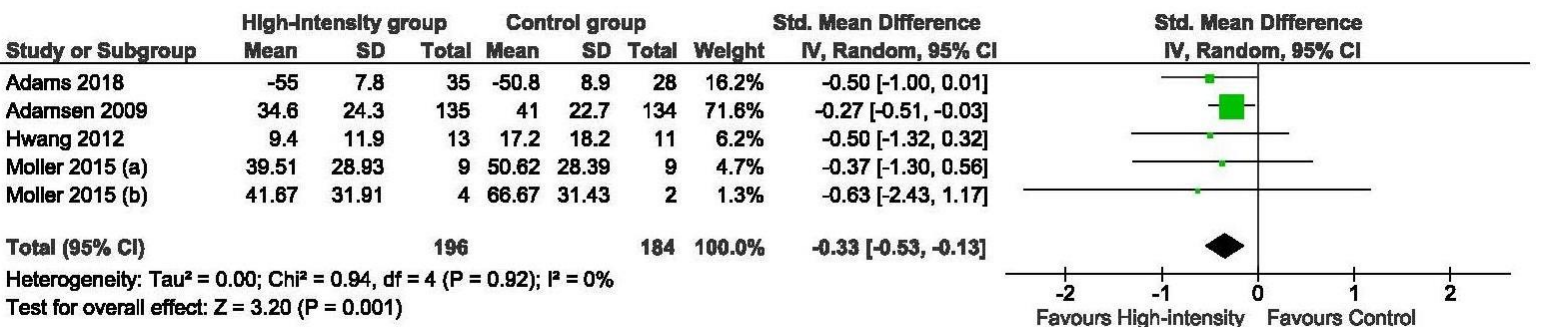

**Supplementary Figure S51:** Effects of training minutes per week in fatigue dimension

Fatigue dimension: Less than 120 minutes of exercise per week

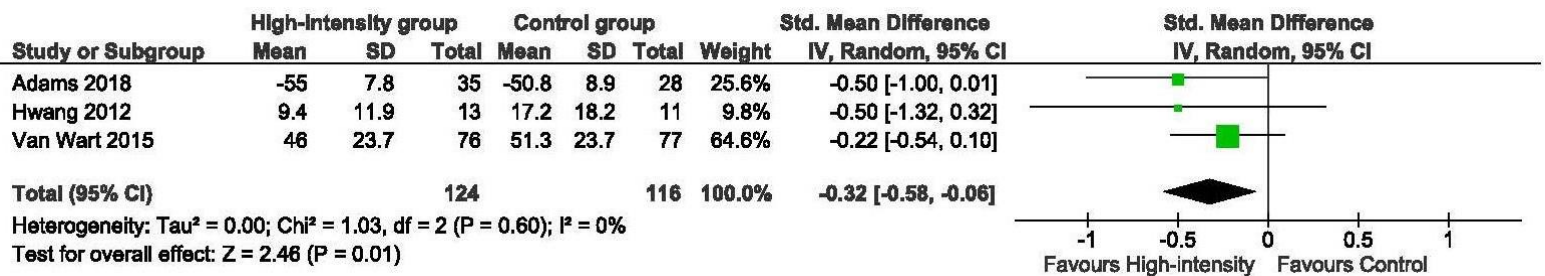

Fatigue dimension: 120 minutes or more of exercise per week

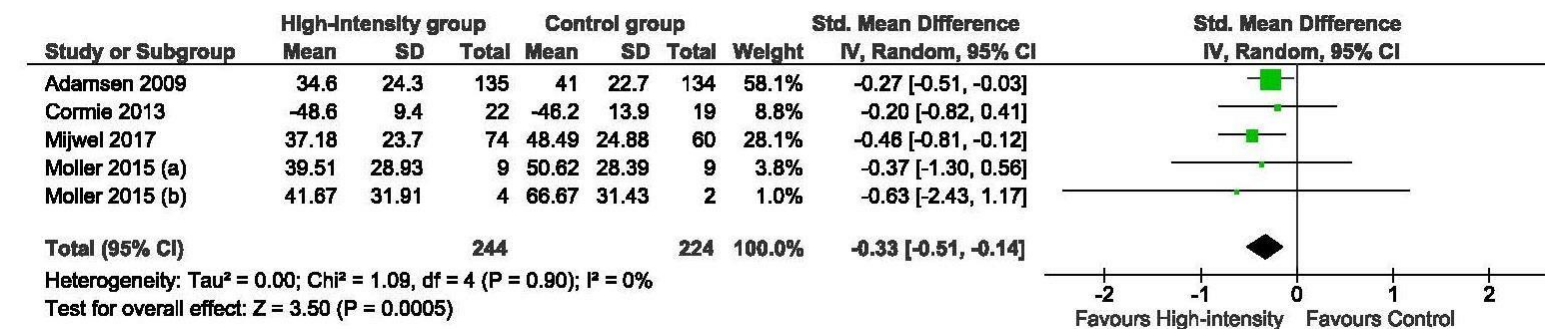

**Supplementary Figure S52: Effects of the high-intensity training part duration in fatigue dimension**

Fatigue dimension: 15 minutes or less of high-intensity training

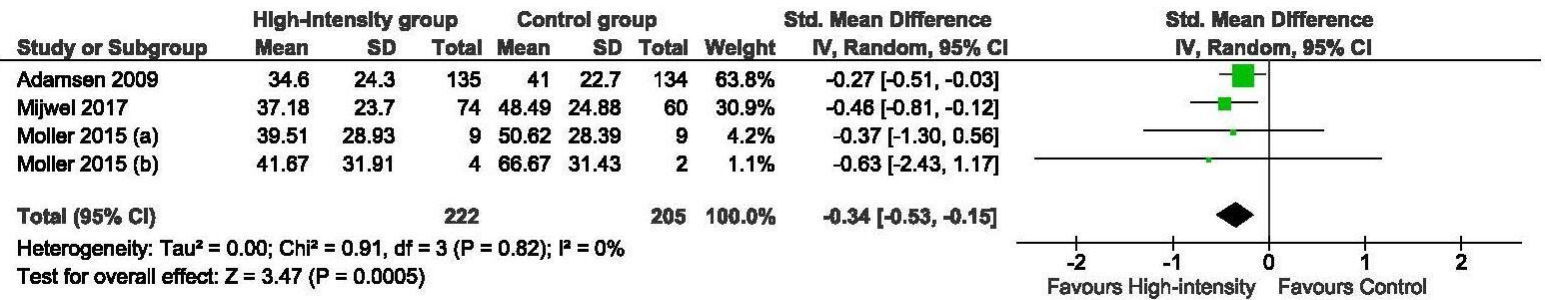

Fatigue dimension: More than 15 minutes of high-intensity training

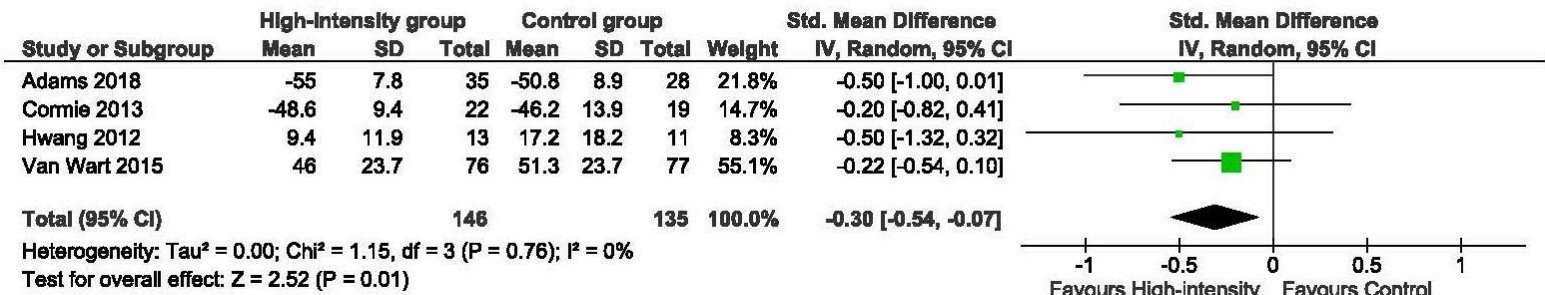

**Supplementary Figure S53: Effects in the bodily pain dimension of the comparisons between high-intensity training group and control group, and high-intensity training group and low-intensity exercise group.**

Bodily pain dimension: Comparison between high-intensity group and control group

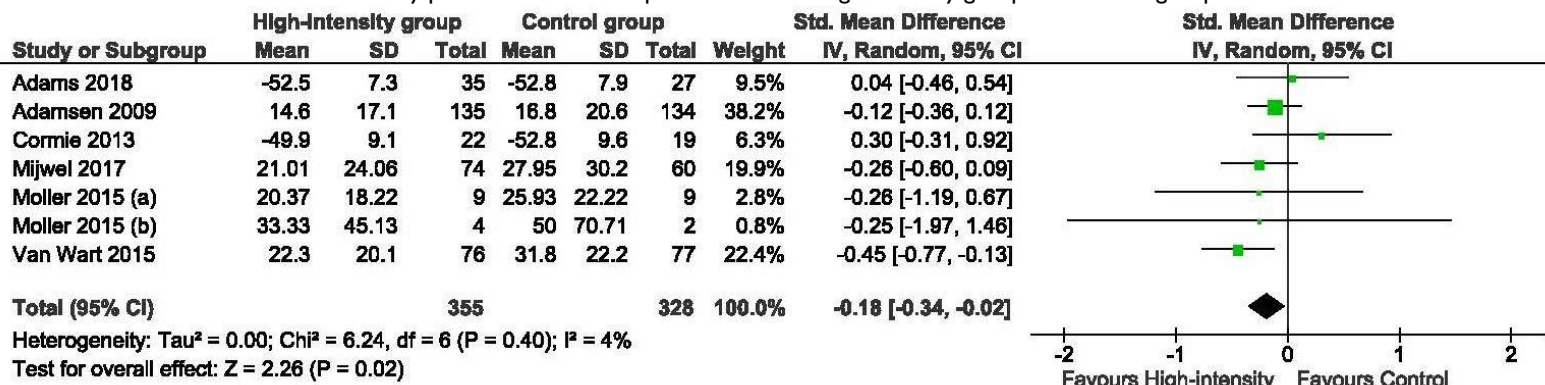

Bodily pain dimension: Comparison between high-intensity group and low-moderate intensity group

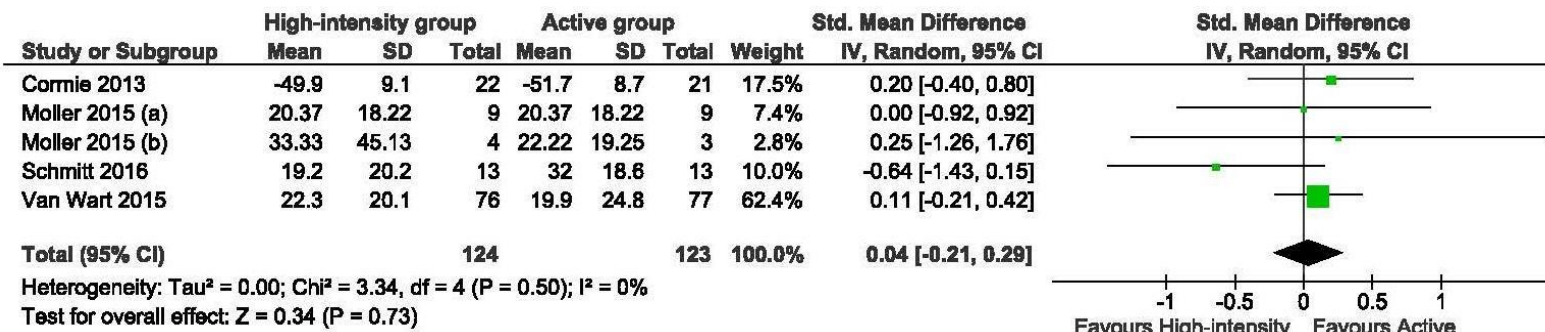



**Supplementary Figure S54:** Effects of the exercise programs length in bodily pain dimension

Bodily pain dimension: Eight weeks of exercise program or less

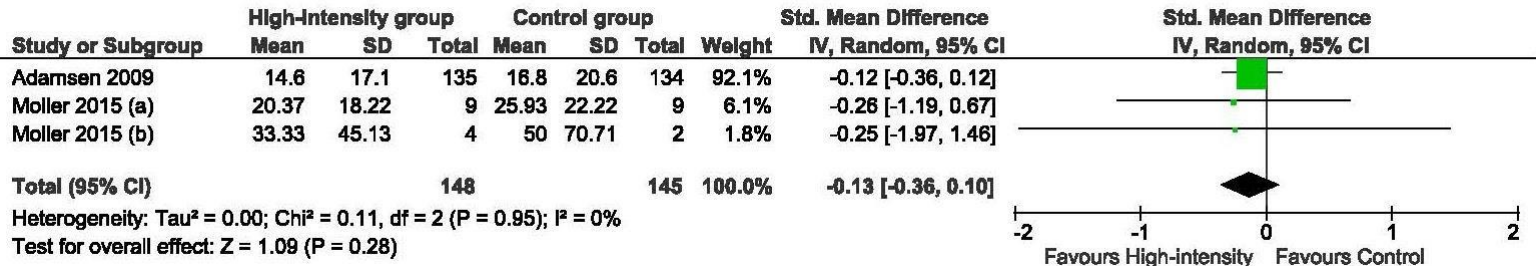

Bodily pain dimension: More than eight weeks of exercise program

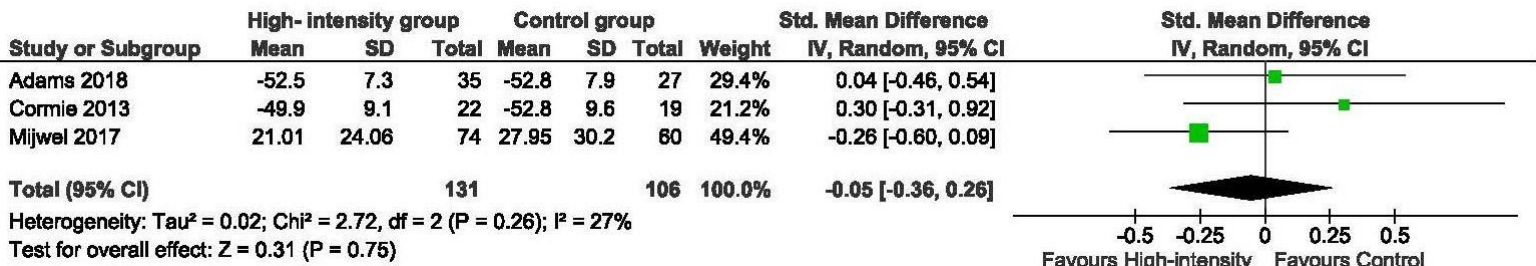

**Supplementary Figure S55:** Effects of the weekly exercise frequency in bodily pain dimension.

Bodily pain dimension: 2 times per week

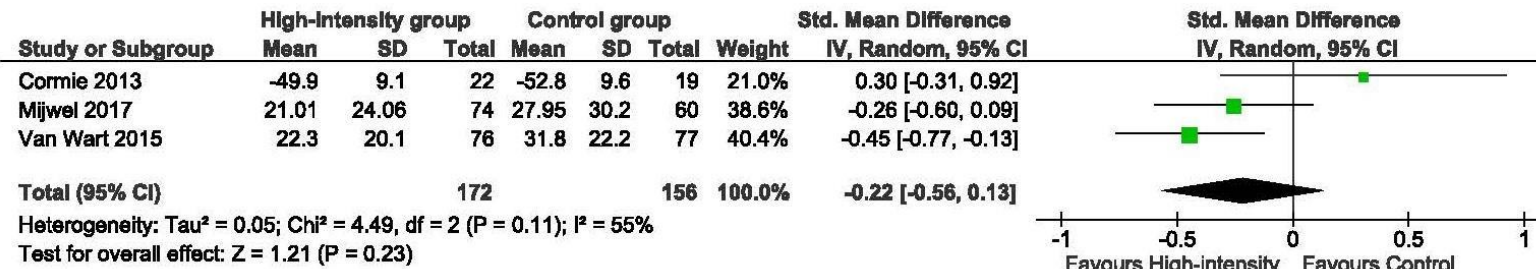

Bodily pain dimension: 3 times per week

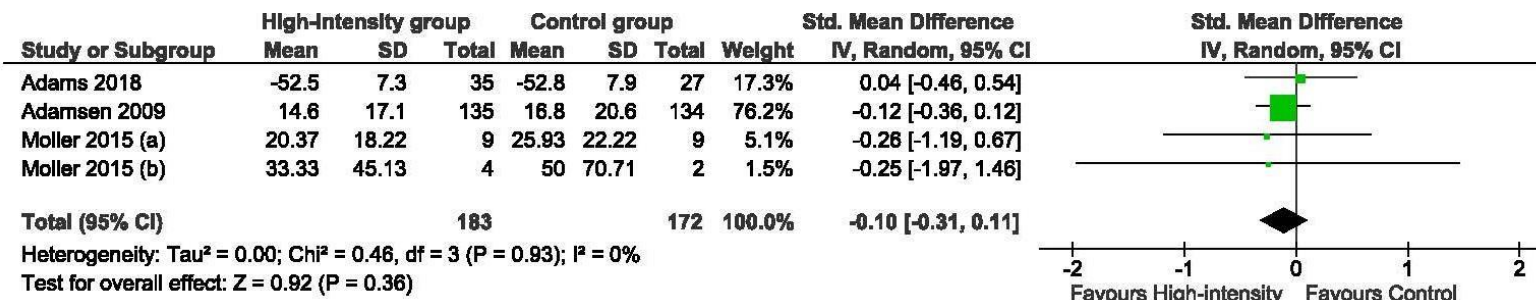

**Supplementary Figure S56:** Effects of the high-intensity training part duration in bodily pain dimension.

Bodily pain dimension: 15 minutes or less of high-intensity training

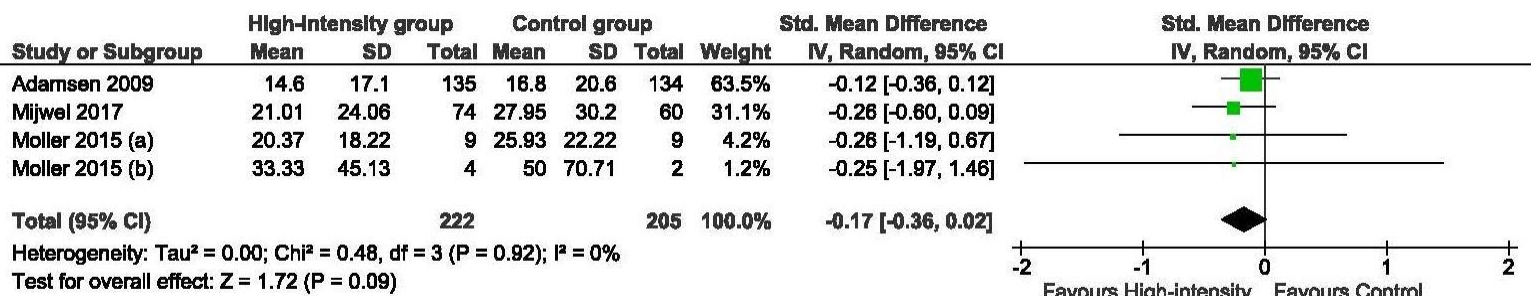

Bodily pain dimension: More than 15 minutes of high-intensity training

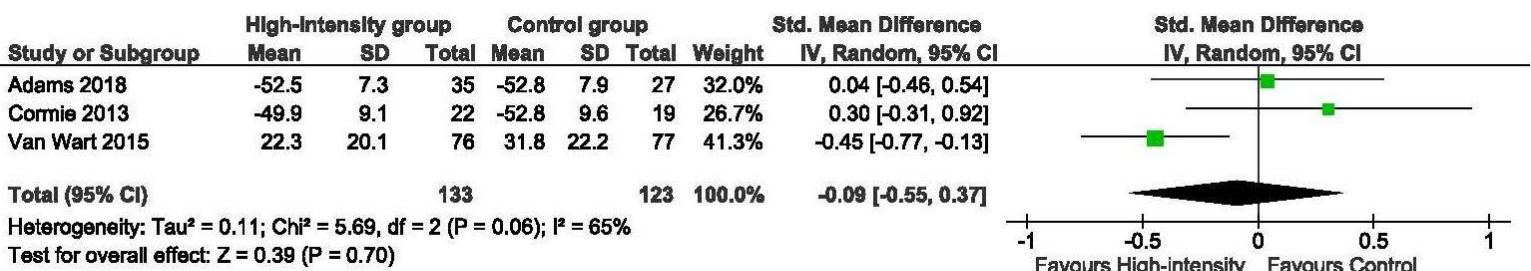

**Supplementary Figure S57:** Effects in the dysnoea dimension of the comparisons between high-intensity training group and control group, and high- intensity training group and low- intensity exercise group.

Dyspnoea dimension: Comparison between high-intensity group and control group

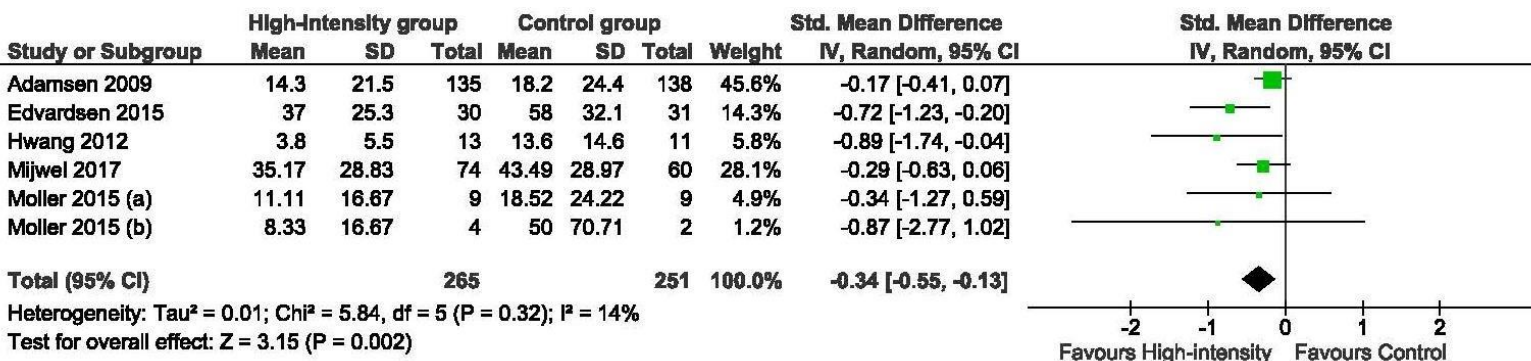

Dyspnoea dimension: Comparison between high-intensity group and low-moderate intensity group

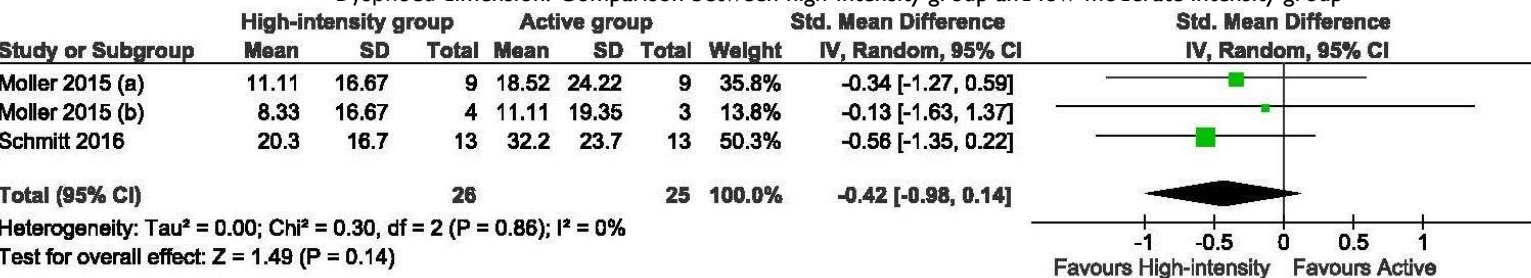



**Supplementary Figure S58:** Effects in the diarrhoea dimension of the comparisons between high-intensity training group and control group, and high- intensity training group and low- intensity exercise group.

Diarrhoea dimension: Comparison between high-intensity group and control group

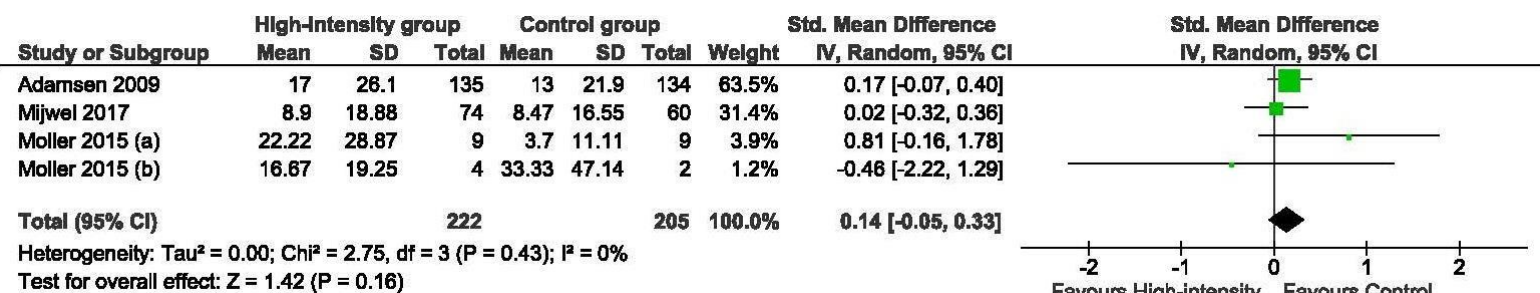

Diarrhoea dimension: Comparison between high-intensity group and low-moderate intensity group

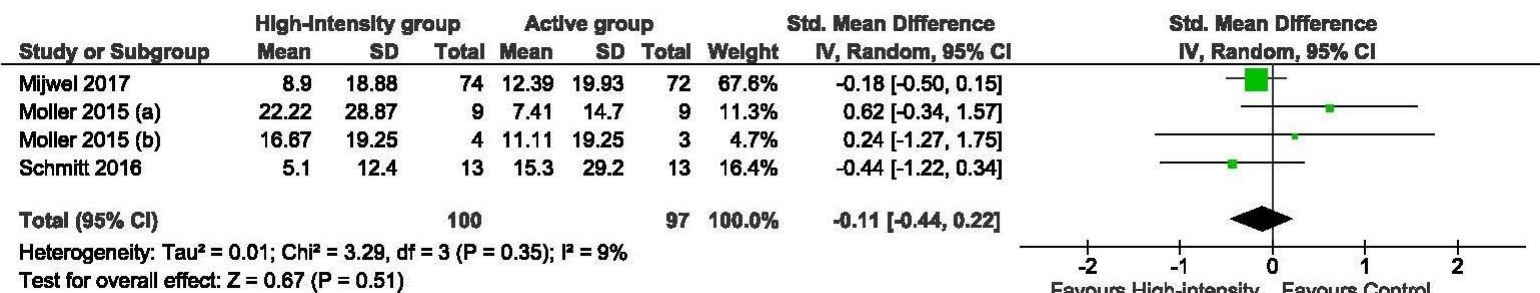

**Supplementary Figure S59:** Effects in the nausea dimension of the comparisons between high-intensity training group and control group.

Nausea dimension: Comparison between high-intensity group and control group.

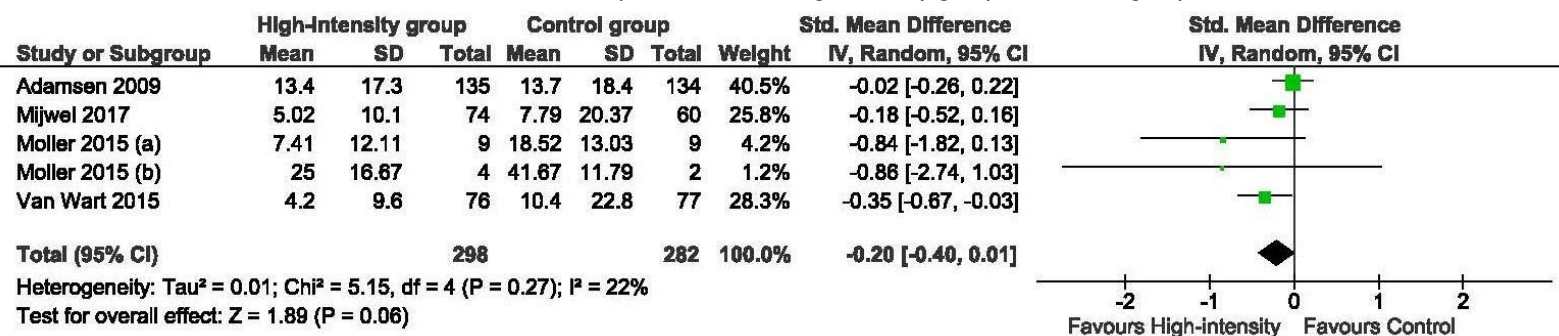

**Supplementary Figure S60:** Effects in the constipation dimension of the comparisons between high-intensity training group and control group.

Constipation dimension: Comparison between high-intensity group and control group.

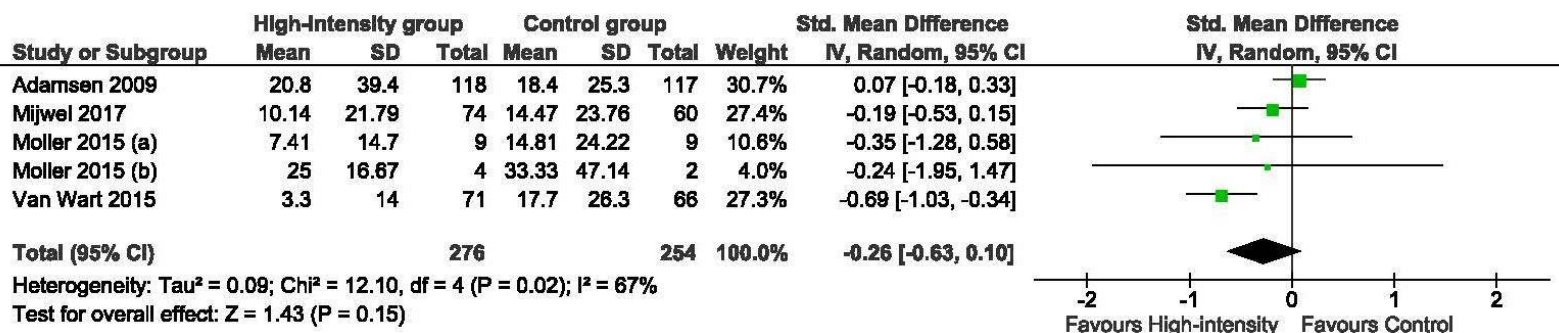

**Supplementary Figure S61:** Effects in the insomnia dimension of the comparisons between high-intensity training group and control group, and high- intensity training group and low- intensity exercise group.

Insomnia dimension: Comparison between high-intensity group and control group

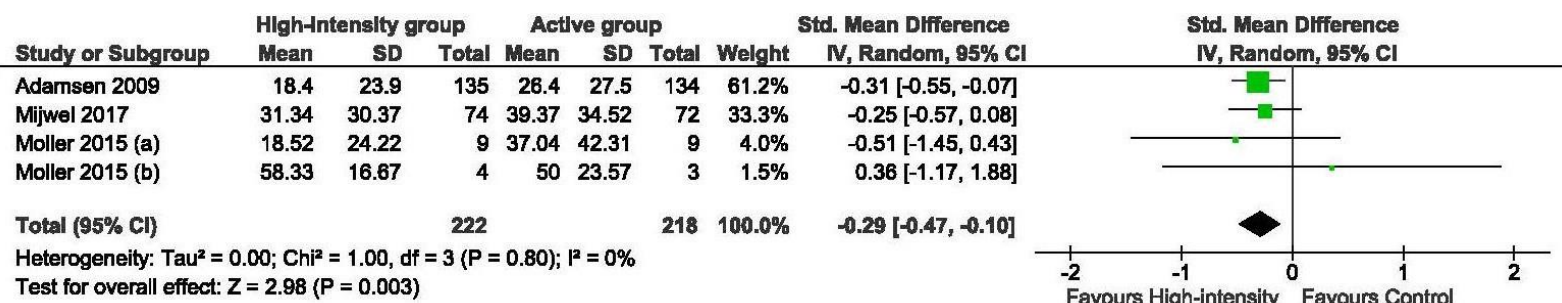

Insomnia dimension: Comparison between high-intensity group and low-moderate intensity group

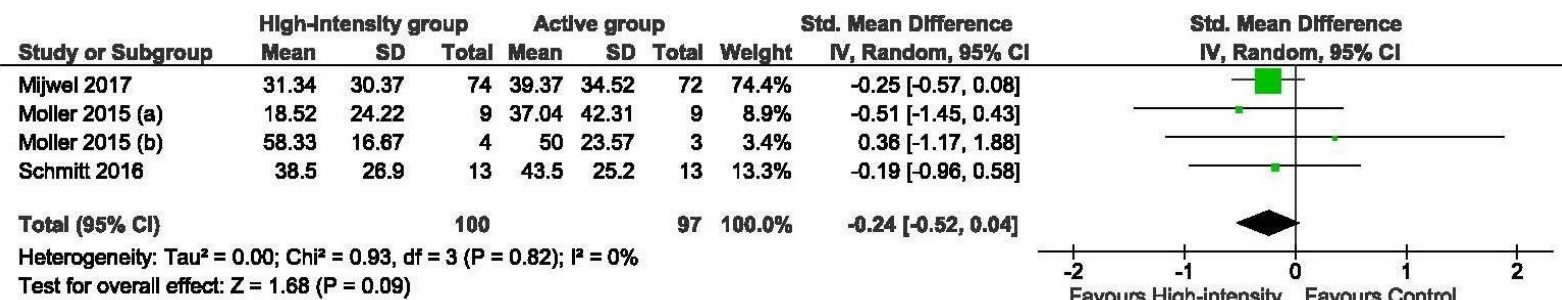

**Supplementary Figure S62:** Effects in the appetite loss dimension of the comparisons between high-intensity training group and control group, and high- intensity training group and low- intensity exercise group.

Appetite loss dimension: Comparison between high-intensity group and control group

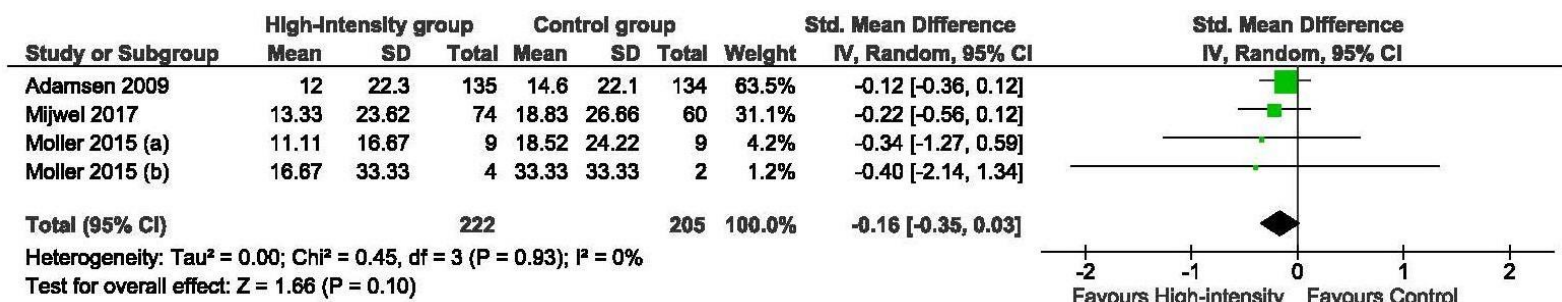

Appetite loss dimension: Comparison between high-intensity group and low-moderate intensity group

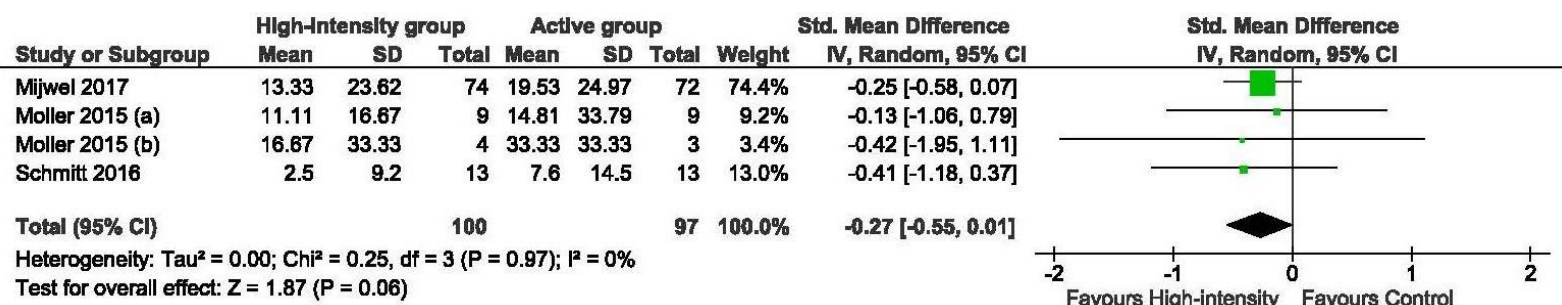

Supplement: 41598_2021_94476_MOESM1_ESM.pdf [file 41598_2021_94476_MOESM1_ESM.pdf]
